1           **Genomic and structural features of the Yellow Fever virus from the 2016-**  
2           **2017 Brazilian outbreak**

3

4   Mariela Martínez Gómez<sup>1</sup>, Filipe Vieira Santos de Abreu<sup>2,3</sup>, Alexandre Araujo Cunha dos  
5   Santos<sup>1</sup>, Iasmim Silva de Mello<sup>1</sup>, Marta Pereira Santos<sup>1</sup>, Ieda Pereira Ribeiro<sup>1</sup>, Anielly  
6   Ferreira-de-Brito<sup>2</sup>, Rafaella Moraes de Miranda<sup>2</sup>, Marcia Gonçalves de Castro<sup>2</sup>, Mario  
7   Sergio Ribeiro<sup>4</sup>, Roberto da Costa Laterrière Junior<sup>5</sup>, Shirlei Ferreira Aguiar<sup>6</sup>, Guilherme  
8   Louzada Silva Meira<sup>6</sup>, Deborah Antunes<sup>7</sup>, Pedro Henrique Monteiro Torres<sup>7</sup>, Ana  
9   Carolina Paulo Vicente<sup>8</sup>, Ana Carolina Ramos Guimarães<sup>9</sup>, Ernesto Raul Caffarena<sup>7</sup>,  
10   Gonzalo Bello<sup>10</sup>, Ricardo Lourenço-de-Oliveira<sup>2\*</sup>, Myrna Cristina Bonaldo<sup>1\*</sup>

11   1-    Laboratório de Biologia Molecular de Flavivírus, Instituto Oswaldo Cruz,  
12   Fundação Oswaldo Cruz, Rio de Janeiro, Brazil.

13   2-    Laboratório de Mosquitos Transmissores de Hematozoários, Instituto Oswaldo  
14   Cruz, Fundação Oswaldo Cruz, Rio de Janeiro, Brazil.

15   3-    Instituto Federal do Norte de Minas Gerais, Salinas, MG, Brazil.

16   4-    Superintendência de Vigilância Epidemiológica e Ambiental, Secretaria Estadual  
17   de Saúde, Rio de Janeiro, Brazil.

18   5-    Núcleo Especial de Vigilância Ambiental, Secretaria Estadual de Saúde do  
19   Espírito Santo, Vitória, Brazil.

20   6-    Laboratório Central de Saúde Pública Noel Nutels (LACEN-RJ), Rio de Janeiro,  
21   Brazil.

22   7-    Programa de Computação Científica (PROCC), Fundação Oswaldo Cruz, Rio de  
23   Janeiro, Brazil.

24   8-    Laboratório de Genética Molecular de Microorganismos, Instituto Oswaldo Cruz,  
25   Fundação Oswaldo Cruz, Rio de Janeiro, Brazil.

26   9-    Laboratório de Genômica Funcional e Bioinformática, Instituto Oswaldo Cruz,  
27   Fundação Oswaldo Cruz, Rio de Janeiro, Brazil.

28   10-   Laboratório de AIDS e Imunologia Molecular, Instituto Oswaldo Cruz, Fundação  
29   Oswaldo Cruz, Rio de Janeiro, Brazil.

30

31

32 **\*Corresponding author:**

33 Correspondence and requests for materials should be addressed to R.L.-d.-O. (email:

34 [lourenco@ioc.fiocruz](mailto:lourenco@ioc.fiocruz)) or M.C.B. ([mbonaldo@ioc.fiocruz.br](mailto:mbonaldo@ioc.fiocruz.br)).

35

36 Keywords: Yellow fever virus, 2016-2017 Brazilian outbreak, amino acid changes,  
37 genetic diversity, evolution

38

39

40

41

42

43

44

45

46

47

48 **ABSTRACT**

49           Brazil has been suffering a severe sylvatic epidemic of yellow fever virus (YFV)  
50 since late 2016. Analysis of full-length YFV genomes from all hosts involved in the  
51 Brazilian 2017 outbreak reveals that they belong to sub-lineage 1E within modern-  
52 lineage, but display several unique amino acid substitutions in highly conserved positions  
53 at NS3 and NS5 viral proteins. Evolutionary analyses indicate that YFV carrying that set  
54 of amino acid substitution circulates in the Southern Brazilian region for several months  
55 before being detected in December 2016. Structural and selection analyses support that  
56 some of these substitutions were under positive selection and could impact enzyme  
57 structure and function. Altogether, this evidence demonstrated that the current Brazilian  
58 YFV carries unique amino acid signatures in the non-structural proteins and support the  
59 hypothesis that those substitutions may be affecting the viral fitness and transmissibility.

60

61 **INTRODUCTION**

62           Yellow fever (YF) is a viral disease transmitted by the bite of infected mosquitoes  
63 in Africa and South America, affecting around 200,000 people annually, mostly in Africa  
64 (1-3). There are two main epidemiological cycles: the enzootic sylvatic cycle where the  
65 virus is transmitted between non-human primates (NHP) and wild arboreal mosquitoes of  
66 genus *Aedes*, *Haemagogus* and *Sabethes*, and in which humans can be accidentally  
67 infected, and the urban cycle where inter-human transmission is ensured by the domestic  
68 and anthropophilic mosquito *Aedes aegypti* (3). While only the sylvatic cycle has been  
69 reported in the Americas during nearly the last 75 years, in Africa people may acquire the  
70 infection in both cycles, besides in an intermediate cycle occurring in rural areas close to  
71 forests (2, 4).

72           The causative agent is the yellow fever virus (YFV) (genus: *Flavivirus*, family:  
73 *Flaviviridae*), presenting a single-positive-sense RNA genome, containing a 5' end cap  
74 structure, that is translated in a single immature polyprotein precursor. The precursor  
75 polyprotein is cleaved into three structural proteins, capsid (C), envelope (E), and  
76 membrane protein (M) and seven non-structural proteins, NS1, NS2A, NS2B, NS3,  
77 NS4A NS4B, and NS5 (2). The virus was originated in Africa, where five genotypes have  
78 been documented, being two from West Africa (West Africa I and II) and three in East  
79 and Central Africa (East Africa, East/Central Africa, and Angola). The YFV virus has  
80 spread from Africa to the Americas together with the invasive mosquito *Ae. aegypti* where  
81 it evolved in the last four centuries into two genotypes (South America I and II) derived  
82 from the Western African ancestor (5-7). The South American genotype I is the most  
83 spread and frequently detected during the epizootics and epidemics waves in Brazil and  
84 other countries of South America (8, 9). Until the 1990's, the transmission area in Brazil  
85 was primarily limited to the Amazon forest, in the Northern, and the savanna-like  
86 *cerrado*, in Center-West region. However, in about two decades, the YFV territory has  
87 progressively expanded Southward and Eastward reaching the Atlantic forest and other  
88 biomes from the country's most populated regions(10). During this boundary expansion,  
89 five viral sub-lineages (1A to 1E) successively arose within the genotype I. They were  
90 distinguished by analysis of partial nucleotide sequencing of the YFV genome  
91 particularly the pre-membrane and envelope (prM/E) gene junction (8, 9, 11). Most  
92 recently, South America genotype I was divided into two major lineages named as Old  
93 lineages (enclosing Old Para, and 1A, 1B, and 1C sub-lineages) and Modern lineage  
94 (enclosing Trinidad and Tobago, and 1D and 1E sub-lineages) (11, 12).

95           A rapid expansion of the YFV area has reported since late 2016 in Southeast Brazil  
96 (Fig.1) (13, 14). From December 2016 to May 2017, the YFV quickly spread from the

97 transition zone between the *cerrado* and the Atlantic forest inland of Minas Gerais State  
98 (MG) to the coastal areas in the Espírito Santo (ES) and Rio de Janeiro (RJ) states, then  
99 approaching to densely populated sites with insignificant vaccination coverage under  
100 influence of the rain forest. A YFV outbreak of unprecedented sanitary severity and  
101 causing an ecological disaster was recorded. In a few months, around 3,850 NHPs died,  
102 and nearly 800 human cases with 435 deaths were registered, of which 274 were YF  
103 confirmed until July 2017 (13, 14). Interestingly, during this ongoing outbreak analysis  
104 of complete nucleotide genome sequences of the YFV obtained from the blood of two  
105 howler monkeys from a single locality in ES confirmed that they cluster within the sub-  
106 lineage 1E. Furthermore, these strains revealed new polymorphisms comprising several  
107 amino acid substitutions mainly located in the components of the viral replicase complex,  
108 in the protease domain of the NS3 protein, and in the methyltransferase (MTase) and  
109 RNA-dependent RNA polymerase (RdRp) domain of the NS5 protein(15). The NS3  
110 protein, a viral multi-functional protein, carries a chymotrypsin-like serine protease  
111 activity (NS3pro) at its N-terminal and an helicase activity (NS3hel) at its C-terminal  
112 domain(16). The NS3pro associated with its cofactor NS2B cleaves all cytoplasmic  
113 protein junction sites of the precursor polyprotein. The NS5 protein contains two  
114 functional domains with a capping related MTase and the central replication enzyme  
115 RdRp (17-19). Connecting MTase and RdRp, there is a linker of 5–6 residues (residues  
116 266–271; NS5 Dengue virus position), which has an essential role in NS5 conformation  
117 and protein activity (20). Also, NS3 and NS5 have been associated with innate immune  
118 system evasion (21, 22). It was unclear, however, whether the observed amino acid  
119 substitutions are genetic signatures of the most recent YF outbreaks as few complete  
120 genomes of current circulating viral strains were available (8, 15).

121           In this study, we elucidated the complete genome sequence of 12 YFV strains  
122 from three hosts (NHPs, mosquitoes, and humans) involved in the transmission cycle of  
123 the current Brazilian outbreak in two Southeastern states (RJ and ES). Sequences were  
124 analyzed to establish whether specific amino acid changes previously observed are fixed  
125 in other recent YFV samples and therefore constitute a molecular signature of the 2017  
126 YFV. We also created homology models for NS3 and NS5 to determine the location and  
127 potential effects of amino acid substitutions on NS3pro and NS5 proteins. Moreover, we  
128 performed phylogenetic and evolutionary studies to analyze the codons that might be  
129 under positive selection pressure and to estimate the time of the most recent common  
130 ancestor ( $T_{MRCA}$ ) of Brazilian YFV 2017 samples.

131

## 132 **RESULTS**

### 133 **YFV samples geographic distribution and genome characterization**

134           From February to June 2017, we collected 15 YFV samples from five distinct  
135 infected host species including mosquitoes, NHP and humans from 11 localities  
136 belonging to three main river basins across the current epidemic/epizootic territory in the  
137 Atlantic coast in ES and RJ (Table 1; Fig. 1). We determined and analyzed the whole  
138 YFV genome of twelve samples: two pools of infected mosquitoes belonging to two  
139 species *Haemagogus leucocelaenus* and *Hg. janthinomys*, six from NHP (four howler  
140 monkeys and two marmosets), and four from human cases (Table 1). Partial sequences of  
141 the YFV genome were also obtained from an additional human case (H189) (data not  
142 shown).

143           The comparison of all the YFV genomes from the ongoing Southeast Brazilian  
144 outbreak reveals low genetic variation, providing a mean nucleotide identity of 99.8 %  
145 and amino acid identity values ranged from 99.9% to 100%. However, part of the

146 nucleotide variations is non-synonymous, leading to new amino acid substitutions in the  
147 polyprotein sequence (Fig. 2; Supplementary file 1). Regardless the host, all the 2017  
148 YFV Brazilian genomes display a set of eight unique amino acid substitutions, that we  
149 have recently identified in two YFV samples from infected howler monkeys (ES-504 and  
150 ES-505) from ES state (15). Remarkably, the comparison with the genome of other South  
151 America strains confirmed that these polymorphisms are only present in the Brazilian  
152 strains from the ongoing outbreak when comparing with other South American strains.  
153 They localize at C protein (V108I), at NS3pro (E1572D; R1605K), at NS5 in MTase  
154 domain (K2607R; V2644I; G2679S), and at NS5 in RdRp domain (V3149A; N3215S)  
155 (Fig. 2). Nevertheless, the partial nucleotide sequence from H189 also displayed all amino  
156 acid changes detected in the other sequences, except for the mutation in the C protein.  
157 Moreover, all 2017 YFV Brazilian strains also share an amino acid change at position  
158 N/D2803S that was previously observed only in a Venezuelan strain isolated in 2006  
159 (GenBank, KM388818). We also detected additional amino acid substitutions, which are  
160 not present in all the 2017 Brazilian genomes (Fig. 2). Accordingly, the YFV H199  
161 sequence shows a change from an alanine (A) to a serine (S) at the amino acid position  
162 826, corresponding to the NS1 protein (position 48). The YFV genomes RJ95, RJ96,  
163 RJ97, H191 and PA193, show a substitution from an isoleucine (I) to a valine (V) at  
164 position 2176 (NS4A, position 77). The phylogenetic analysis of prM/E sequences  
165 indicates that all 2017 YFV Brazilian strains cluster inside sub-lineage 1E of the Modern  
166 lineage of South America genotype I in a monophyletic clade with high support (bootstrap  
167 = 87 %) (Fig. 2 – Fig. Supplement 1). The same clustering pattern was obtained when we  
168 performed the phylogenetic analyses of either NS3 or NS5 nucleotide sequences (Fig. 2  
169 – Fig. Supplement 2).

## 170 **Modeling and Structural Analysis of NS2B/NS3 and NS5 proteins**

171 We created structural models of NS3 and NS5 proteins to gain some insights into  
172 the structural and functional effects of these amino acid substitutions. Initially, prior to  
173 the structural model generation, we aligned the NS3 and NS5 amino acid sequences of  
174 the prototype 2017 Brazilian YF virus (strain ES505) (15) with the different template  
175 sequences (Fig. 3– Fig. Supplements 1; Fig. 4– Fig. Supplements 1).

176 The effect of the amino acid substitutions on both NS3 and NS5 proteins was  
177 evaluated through hydrogen bond formation and electrostatic analysis. The two  
178 substitutions found in NS3, E88D and R121K (polyprotein position: E1572D; R1605K,  
179 respectively) are conservative and, as such, they have little impact on the surface  
180 electrostatic potential (Fig. 3 C, D). For the E88D substitution, a small structural change  
181 was observed, which mainly consisted of lysine 174 (polyprotein position: K1658) side  
182 chain displacement due to the loss of a hydrogen bond with the protein backbone (Fig. 3  
183 E, F). On the other hand, the R121K substitution is located near the NS2B binding groove  
184 and might influence the interaction between these two molecules. Hydrogen bond  
185 analysis indicates that K 121 could favor the formation of a hydrogen bond with threonine  
186 77 of NS2B (polyprotein position: T1431), whereas such an interaction was not identified  
187 in 2010 model (Fig. 3 A, B). This interaction could, in turn, modulate the NS3-NS2B  
188 binding affinity and, thus, the protease efficiency.

189 The three first amino acid substitutions in NS5 are clustered in the MTase domain,  
190 whereas the remaining ones are in the RdRp domain. All amino acid substitutions at the  
191 MTase domain are conservative, but they are spatially adjacent. Arginine 101  
192 (polyprotein position: R2607) alpha carbon is 9.7 Å away from that of isoleucine 138  
193 (polyprotein position: I2644), which in turn is 10.6 Å away from serine 173 alpha carbon  
194 (polyprotein position: S2679). These three residues face the RdRp domain tunnel opening  
195 (Fig. 4B), which presents a basic electrostatic profile to accommodate the YFV RNA



196 molecule (Fig. 4 – Fig. Supplement 2), suggesting that they may influence the enzyme  
197 activity.

198 Additionally, the N297S substitution (polyprotein position: N/D/S 2803) from the  
199 RdRp domain, although being conservative, is located near the hinge domain. The  
200 remaining two amino acid alterations: V643A (polyprotein position: V/A 3149) and  
201 N709S (polyprotein position: N/S 3215) are located at the protein surface and are also  
202 conservative. The combined effect of the mutations on the NS5 protein dynamics was  
203 assessed through molecular dynamics simulations, which indicate that the NS5 protein  
204 from 2017 sample has a decrease in fluctuation around the hinge region (Fig. 4– Fig.  
205 Supplement 3).

#### 206 **Selection analyses**

207 The mean dN/dS ratio of substitutions per site estimated by the SLAC method for  
208 the South America genotype I (SAI) and West Africa (WA) data sets was 0.05 and 0.04,  
209 respectively; thus indicating that purifying selection was the main evolutionary force of  
210 both YFV genotypes. Tests for negative/positive selection, however, reveal some  
211 important differences in the evolutionary dynamics of both genotypes (Fig. 5).

212 Selection analysis of the SAI dataset identifies 13 codons with evidence of  
213 positive selection, including nine sites with evidence of episodic diversifying selection  
214 (MEME), four sites with evidence of pervasive diversifying selection (FEL and/or  
215 FUBAR) and one site identified by all three algorithms (FEL, MEME, and FUBAR).  
216 Most sites (69%, 9/13) under positive selection were concentrated in a short genome  
217 segment (2,100-2,850 codon positions) coding for non-structural proteins NS4A  
218 (I2176V), NS4B (H2311L, N2408S, K2502N, T2503I) and NS5 (R2601K, R2640P,  
219 D2647V, N/D2803S) (Fig. 5 – Fig. Supplement 1). Selection analysis of the WA dataset,  
220 by contrast, detected no sites under pervasive diversifying selection and identified 18 sites

221 with evidence of episodic diversifying selection (MEME) uniformly distributed along  
222 structural and non-structural proteins (Fig. 5 – Fig. Supplement 1).

### 223 **Evolutionary analyses**

224 The Bayesian MCC tree inferred from the complete coding sequence (CDS) of  
225 YFV South American genotypes I and II reveals that YFV strains from the ongoing  
226 Southeast Brazilian outbreak grouped in a highly supported (*Posterior Probability [PP]*  
227 = 1) monophyletic cluster nested within sub-lineage E strains of the modern-lineage (Fig.  
228 6). We further observed that 2017 YFV Brazilian strains segregate in two reciprocally  
229 monophyletic subgroups, one sub-cluster comprising strains of mosquitoes, NHP and  
230 humans from RJ and ES states (sub-clade A) (*PP* = 0.29), and one highly supported (*PP*  
231 = 0.99) sub-cluster containing YFV strains of NHP and humans from the state of RJ (sub-  
232 clade B). The median substitution rate of YFV South American genotypes complete  
233 genomes was estimated at  $3.5 \times 10^{-4}$  subst./site/year (95% HPD:  $2.4\text{-}4.8 \times 10^{-4}$   
234 subst./site/year), in agreement with previous estimations(12). The median  $T_{MRCA}$  for all  
235 Brazilian 2017 YFV strains was estimated in April 2016 (95% HPD: July 2015 - October  
236 2016) and for the sub-clade B at October 2016 (95% HPD: April 2016 - January 2017).  
237 In addition, the median  $T_{MRCA}$  of Venezuelan and Brazilian 2017 YFV strains was  
238 estimated as occurred 24 years ago.

239

### 240 **DISCUSSION**

241 In the 2016-2017 YFV outbreak in Southeast Brazil, most of the epizootics and  
242 human cases originally occurred in inland rural areas of MG and subsequently in Eastern  
243 Atlantic coastal sites under the influence of the ES rain forest segments. After that, the  
244 YFV spreading approached and even touched the Great Metropolitan areas of Vitoria  
245 (ES) and Rio de Janeiro (RJ), where lived nearly 1.8 and 12.3 million unvaccinated

246 inhabitants, respectively. Alarming, these densely populated areas host some of the  
247 busiest South American airports, ports and road networks, are highly infested by YFV  
248 competent urban vectors, *Aedes aegypti* and *Ae. albopictus*, and have repeatedly been the  
249 territory of severe dengue epidemics. All together, these ecological and sanitary marks  
250 raised concern about the potential risk of YFV to reemerge in an urban cycle in Brazil as  
251 well as to spread to other countries and continents rapidly(23, 24). Furthermore, YFV  
252 strains characterized by a set of amino acid polymorphism were identified during this  
253 outbreak, and their biological impact needed to be investigated (15).

254         Regardless of deriving from five distinct host species infected in a six month lag  
255 in 11 sites dispersed along 350 Km of the Southeast Brazilian coast across the outbreak  
256 territory including the Great Metropolitan area of Rio de Janeiro, the YFV samples  
257 analyzed in the current study are almost identical at the nucleotide and amino acid levels.  
258 Also, they share a molecular signature represented by nine amino acids, being eight in  
259 highly conserved positions at NS3 and NS5 encoding regions, and one in the structural  
260 capsid protein. Previous analysis of 2017 YFV from two howler monkeys from a single  
261 site in ES had not considered the substitution at position 2803 at NS5. However, in the  
262 current study, the analysis of a higher number of samples allowed the identification of  
263 one more substitution at position 2803 at NS5 in all 2017 YFV. This molecular signature  
264 represented by nine amino acids have never been observed before in South-American and  
265 African genotypes (15).

266         Hypothetically, amino acid changes at conserved protein positions of NS3 and  
267 NS5 may have a role in the capacity of viral infection to vertebrate and invertebrate hosts  
268 and thus accelerating the spreading of the ongoing outbreak. The NS3 and NS5 proteins  
269 have multiple enzymatic activities essential for viral RNA replication and 5'-capping (25-  
270 27). For these reasons, we also investigated the impact of the identified amino acid

271 substitutions through the structural analysis of NS3 and NS5 protein models. Even though  
272 all the amino acid substitutions were mainly conservative, they occur close to domains  
273 that might be affected by these subtle modifications. Furthermore, we were able to detect  
274 features that may correlate with an increase in enzymatic efficiency and constitute an  
275 advantage in viral dissemination. In the NS3 protein, the R121K substitution is located in  
276 the region responsible for the interaction with NS2B, the cofactor for the proteolytic  
277 activity of this enzyme. Although both residues bear a positive charge, lysine was shown  
278 to potentially establish a hydrogen bond with NS2B, due to the less bulky side chain. For  
279 the NS5 protein, we found that the three amino acid substitutions located at the MTase  
280 domain were spatially contiguous and could influence the relative orientation between  
281 the two domains. The N297S substitution might also have a significant role in the  
282 enzymatic efficiency since is located near the hinge domain. Hence, molecular dynamics  
283 simulations have shown that all these substitutions combined may have a stabilizing effect  
284 on the linker domain, which has been demonstrated to influence the enzyme processivity  
285 directly and viral replication in Dengue 4 virus *in vitro* models (28, 29). These findings  
286 shall be addressed in future studies considering the unrevealed diversity of the YFV in  
287 the cell culture and animal models.

288         A hot spot region of episodic or pervasive positive selection was identified in  
289 between codons 2100-2850 of CDS region in YFV genomes of South American genotype  
290 I, that was not detected in the West Africa genotype. Interestingly, most of these  
291 positively selected sites localize in the NS4B, and NS5 coding regions have also been  
292 described in Zika virus from the current epidemics(30). Several studies have  
293 demonstrated the role of non-structural proteins in the host innate immune response  
294 against flavivirus infection (22, 31-33). Onward, these proteins widely interact with other  
295 viral proteins and host molecules (27, 33-35). It is also interesting to note that the 2803

296 position, part of the molecular signature of 2017 YFV, is one of the positively selected  
297 sites. Also, two other positions positively selected (826 and 2176), presented variability  
298 in the 2017 YFV. These observations support some singularities in the evolutionary  
299 dynamics of YFV South American genotype I and also indicate that fixation of some  
300 amino acid substitutions in Brazilian 2017 YFV strains might have been driven by  
301 positive selection.

302         Since the beginning of the XXI, a striking spreading of the YFV has been  
303 occurring in Brazil. The outbreaks formerly constrained to the endemic Amazon and  
304 Central-Western regions have reached the South and Southeast of Brazil, where  
305 vaccination coverage against YF was insignificant until the explosion of the ongoing  
306 outbreak. It has been recently proposed that a YFV strain from Trinidad-Tobago  
307 introduced in Brazil and Venezuela in the late 1980s originate all modern-lineages strains  
308 belonging to sub-lineages 1D and 1E (12). The main source of variability related to the  
309 ancestral lineages is the occurrence of several amino acid substitutions particularly within  
310 non-structural viral proteins (12), as observed in the 2017 Brazilian outbreak YFV. All  
311 Brazilian 2017 YFV belonged to the sub-lineage 1E and clustered with the Venezuelan  
312 strains isolated in the late 2000s, consistent with the notion that ancestral YFV strain  
313 responsible for the ongoing Brazilian outbreak would have originated in Venezuela (12).

314         Although Brazilian 2017 YFV strains are most closely related with Venezuelan  
315 2004-2010 YFV strains, they share a relatively distant common ancestor traced to 1993  
316 (95% HPD: 1987-1997) (Fig. 6). This indicates that the virus may have circulated in  
317 endemic South American regions for a long period before being introduced in Southeast  
318 Brazil, but the precise pathway of viral dissemination is difficult to elucidate because the  
319 paucity of Brazilian YFV sequences sampled from endemic regions over the last 10-15  
320 years. We estimate the median  $T_{MRCA}$  for the Brazilian 2017 YFV strains at early 2016,

321 suggesting that the virus circulated for several months in the Southeastern region before  
322 the ongoing outbreak was first recognized at December 2016. This pre-detection period  
323 of cryptic transmission of YFV in Southeastern Brazil is comparable to that recently  
324 estimated for Zika virus in the Northeastern Brazilian region (36).

325 Bayesian analysis also showed that Brazilian 2017 YFV strains segregate into two  
326 sub-clusters, one of them (sub-clade A) containing sequences from both RJ and ES, and  
327 the other (sub-clade B) comprising only sequences from RJ whose  $T_{MRCA}$  was traced to  
328 October 2016. It is also interesting to note that all YFV sequences of RJ that branched  
329 within sub-clade A were sampled from sites situated in the Paraíba do Sul basin whose  
330 tributaries born on the northern side of the Serra do Mar, a 1,500km long system of  
331 mountain ranges and escarpments that runs parallel to the Atlantic Ocean coast in  
332 Southeastern Brazil (Fig. 1). By contrast, YFV sequences of RJ that branched within sub-  
333 clade B were obtained from locations situated along the Macaé conjugated river basin  
334 whose tributaries born on the escarpments of the coastal side of the Serra do Mar. The  
335 only exception is the sample H190, which despite originating in the Paraíba do Sul river  
336 basin, it clustered in the sub-clade B. Intriguingly, the sampling location of H190 (São  
337 Fidelis) is located in the largest discontinuity of the long mountain ranges of the Serra do  
338 Mar and this YFV strain branched basally to all other sub-clade B strains. Together, these  
339 results support the occurrence of multiple independent introductions of YFV in RJ  
340 (probably from both ES and MG) and further indicate at least two main routes of viral  
341 dissemination within the state running at the northern and coastal sides of the Serra do  
342 Mar. These analyses also point that YFV dissemination through the coastal route in Rio  
343 de Janeiro probably started in São Fidelis around late 2016, but more YFV sequences  
344 from other Southeastern states are necessary to confirm this conclusion.

345 Future analysis based on reverse genetic approaches can contribute to establishing  
346 the role of amino acid substitutions present in Brazilian 2017 YFV in the viral fitness and  
347 transmissibility. It will also be crucial to improving the number of YFV genomes from  
348 Brazilian endemic and non-endemic regions in the last years to better understand the  
349 epidemiology during recent years.

350

## 351 **MATERIAL AND METHODS**

### 352 **Ethics Statements.**

353 This study was reviewed and approved by the Ethics Committee for human  
354 research at the Instituto Oswaldo Cruz (IOC) (CAAE 69206217.8.0000.5248), which  
355 exempted the need of a specific written informed consent from patients or their legal  
356 representatives. The protocols for mosquito rearing as well as handling and blood  
357 sampling of NHP were approved by the Institutional Ethics Committee of Animal use at  
358 IOC (CEUA licenses LW-34/2014 and L037/2016, respectively). Capture of wild NHPs  
359 and mosquitoes were approved by the Brazilian environmental authorities: SISBIO-  
360 MMA licenses 54707-137362-2 and 52472-1, and INEA license 012/2016012/2016. No  
361 specific permits are needed for conducting mosquito collection in the urban and suburban  
362 areas in Southeastern Brazil. This study does not include endangered or protected species.

### 363 **Mosquito samples**

364 Adult mosquitoes were collected with BG-sentinel adult traps baited with dry ice  
365 as a source of CO<sub>2</sub> as well as with an insect net when approaching to humans in the forest,  
366 at the forest fringe, and in the modified environment. The insects were immediately frozen  
367 in dry ice or N<sub>2</sub>, transported to the laboratory, identified to species according to Consoli  
368 and Lourenço-de-Oliveira (36), and pooled according to species, the number of captured  
369 mosquitoes and collecting site and day. Entire bodies of pooled mosquitoes were ground

370 and treated in Leibovitz L15 medium (Invitrogen) supplemented with 4% Fetal Bovine  
371 Serum (FBS), and submitted to the RNA extraction as described elsewhere(37).

### 372 **Non-human primate samples**

373 Blood samples were taken from the femoral vein of dying NHPs or the cardiac  
374 cavity of recently dead NHPs. Samples from howler monkeys were centrifuged (2,000 g  
375 for 10 min) for obtaining plasma or serum samples stored at low temperature (N<sub>2</sub> or – 80  
376 °C) until RNA extraction. Due to the small amount of blood in the cardiac cavity of dead  
377 marmosets, RNA extraction was performed from total blood frozen in dry ice  
378 immediately after collection in the field.

### 379 **Human samples**

380 Blood samples were obtained from patients for diagnosis procedures made at their  
381 respective municipal public health ambulatories. Serum samples of suspicious clinical YF  
382 cases were sent to the State Central Laboratory in Rio de Janeiro (LACEN-RJ) for  
383 molecular and serological analyses. Aliquots of serum samples of YFV laboratory-  
384 confirmed cases and negative for Zika virus, Chikungunya virus and Dengue virus  
385 infection were selected by the LACEN-RJ staff and stored at - 80 °C until RNA  
386 extraction.

### 387 **YFV RNA extraction, screening for YFV infection by RT-PCR and** 388 **Nucleotide Sequencing**

389 YFV RNA from mosquito homogenates, blood, and serum samples were obtained  
390 by using the QIAamp Viral RNA kit (Qiagen). The RNA samples were eluted in 60 µL  
391 of AVE buffer and stored at - 80 °C until use. The YFV RNA was reverse transcribed  
392 using the Superscript IV First-Strand Synthesis System (Invitrogen) with random  
393 hexamers or specific primers at 25 °C for 10 min, 55 °C for 10 min and 80 °C for 10  
394 min. Detection of YFV genome was performed by conventional PCR as described



395 elsewhere (15). Complete YFV genome amplification was carried out by conventional  
396 PCR using KAPA HiFi PCR kit (KAPABIOSYSTEMS) under the following conditions:  
397 95 °C for 3 min, followed by 35 cycles at 98°C for 20 sec, 65°C for 15 sec and 72°C for  
398 45 sec, and a final extension at 72 °C for 1 min 30 sec. The set of primers utilized in PCR  
399 and sequencing procedures are listed in the Supplementary files 2 and 3, respectively.  
400 Complete genome sequences were deposited in the GenBank database (Table 1).  
401 Amplified products were sequenced as previously described (15). The sequenced  
402 amplicons were analyzed, and contigs were assembled by using SeqMan Pro v8.1.5 (3),  
403 414 (DNASTAR, Madison, WI). The sequences were manually edited and compared with  
404 other sequences available in GenBank (<https://www.ncbi.nlm.nih.gov/genbank/>). The  
405 Molecular Evolutionary Genetics Analysis (MEGA) 7.0 program was used to calculate  
406 nucleotide and amino acid distances, as well as to explore the amino acid signatures  
407 observed in the YFV strains from the ongoing outbreak in Southeast Brazil.

#### 408 **Comparative modeling, optimization and MD simulation of NS3 pro and NS5** 409 **proteins**

410 We performed the modeling of the NS2B-NS3 protein complex and NS5 protein  
411 of the 2017 outbreak YFV prototype (Genbank, KY885001) and the 2010 Venezuelan  
412 10A strain (Genbank, KM388816). Initially, we used BLASTP program  
413 (<https://blast.ncbi.nlm.nih.gov/Blast.cgi?PAGE=Proteins>), defining the Protein Data  
414 Bank (PDB) as a search set, to select the template structures for comparative modeling.  
415 Three PDB structures were used as templates for the NS2B-NS3 protein complex.  
416 Template 2VBC (51% identity and 96% of coverage) corresponds to the crystal structure  
417 of the NS3 protease-helicase from dengue virus(38). Template 1YKS (96% identity and  
418 70% of coverage) comprises the NS3 helicase domain of the YFV(39). Template 5GJ4  
419 comprises the NS3 protease domain (56% identity and 27 % of coverage) and NS2B

420 peptide cofactor (42% identity and 31 % of coverage) of Zika virus(40). For the NS5  
421 model generation, a single PDB structure from Japanese Encephalitis virus (4K6M) (19)  
422 was used as a template, which shares 60% identity with the YFV sequence. Template and  
423 target sequences were then aligned using the PSI-Coffee mode of T-Coffee program(41).  
424 One hundred homology models were generated using the standard “auto model” routine  
425 of Modeller version 9.18 (42) for each target sequence. Each model was optimized using  
426 the variable target function method (VTFM) optimization until accomplishing 300  
427 iterations. Molecular dynamics (MD) optimization, in the slow level mode, was carried  
428 out. The full cycle was repeated two times to produce an optimized conformation of the  
429 model. The resulting modeled structures were selected according to their discrete  
430 optimized protein energy (DOPE) score. The GROMACS version 5.1.2 package(43), was  
431 used to carry out minimization using the AMBER99SB ILDN force field(44). A short  
432 minimization procedure of 150 steps (100 steps of steepest descent + 50 steps of  
433 conjugate-gradient) was performed. Initial and optimized models were evaluated by  
434 DOPE, Ramachandran plot and QMean server (Supplementary File 4) (45). The  
435 electrostatic potential analysis was conducted using the APBS program(46). Atomic  
436 partial charges and atomic radii parameters from the Amber force field were assigned  
437 using the PDB2PQR server (47). Figures of sequence alignments were rendered using  
438 ALINE (48), and 3D structures were generated using UCSF Chimera and PyMol.

439 Molecular dynamics simulations were carried out using the GROMACS package,  
440 with the AMBER99SB-ILDN force field. Protonation states were assigned using pdb2pqr  
441 software, and the zinc-coordinating cysteine residues were manually deprotonated. The  
442 models were further optimized prior to the MD runs, through  $5.0 \times 10^6$  steps of the  
443 Steepest Descent (with and without heavy atom restraints) and Conjugate Gradients  
444 algorithms. The systems were then run, under an NPT ensemble, for 500 ps with restraints

445 and  $2.0 \times 10^5$  ps without restraints. The V-rescale thermostat and Berendsen barostat  
446 were used for temperature and pressure control, respectively. The 2010 and 2017 strains  
447 and replicas were simulated at 297 and 310 K for a total of 8 runs and  $1.6 \times 10^6$  ps.  
448 Analysis was made over the final 150 ns of the production runs.

#### 449 **PrM/E phylogenetic analysis**

450 A 666-nucleotide sequence consisting of the last 108 nucleotides of the prM gene,  
451 the entire M gene (225 nucleotides), and the first 333 nucleotides of the E gene was used  
452 to established genotype the YFV strains, as previously described(5). In addition to the  
453 sequences obtained in the current study, a set of sequences of the prM/E junction fragment  
454 were selected using the Blast tool (<https://blast.ncbi.nlm.nih.gov/Blast.cgi>) and all  
455 sequences were aligned using Molecular Evolutionary Genetics Analysis (MEGA)  
456 7.0(49). The phylogenetic tree was generated by the Neighbor-joining method (50) using  
457 a matrix of genetic distances established under the Kimura-two parameter model (51).  
458 The robustness of each node was assessed by bootstrap resampling (2,000 replicates) (52).  
459 The homologous region (prM/E) of a dengue virus strain available at the GenBank  
460 database (AF349753) was used as an outgroup.

#### 461 **Selection pressure analyses**

462 Two datasets of sequences were determined: a) Dataset South America I (Set SAI)  
463 with all complete CDS of South American YFV stains available in the GenBank plus  
464 sequences obtained in the current study (N=32); b) Dataset West Africa (Set WA), with  
465 complete CDS from West Africa genotype YFV strains available in the Genbank. The  
466 reason to generate these two datasets was that West African genotype has a closest genetic  
467 relationship with South America genotype I (5), and only two CDS from YFV strains  
468 belonging to South America genotype II are available in the GenBank to date. Datasets  
469 were aligned using Bioedit v7.2.3 (53) and were tested for positive selection by using the

470 online adaptive evolution server DATAMONKEY(54, 55). The ratio of non-synonymous  
471 to synonymous substitutions (dN/dS) per codon sites were estimated using four different  
472 methods, SLAC - Single Likelihood Ancestor Counting, FEL - Fixed Effects  
473 Likelihood(56), MEME - Mixed Effects Model of Evolution(57) and FUBAR - Fast  
474 Unbiased Bayesian Approximate(58). The analysis was run based on neighbor-joining  
475 tree and significant P-value ( $< 0.1$ ). The automated model selection tool available in the  
476 server was used for selection of appropriate nucleotide substitution bias model for both  
477 datasets.

#### 478 **Evolutionary analyses**

479 Complete coding regions sequences (CDS - 10,239 nt in length) of YFV of  
480 American origin (South America genotypes I and II), with a known date of isolation, were  
481 obtained from the GenBank database ([www.ncbi.nlm.nih.gov](http://www.ncbi.nlm.nih.gov)). Retrieved sequences were  
482 aligned together with sequences obtained in the current study using MEGA 7.0 (49). The  
483 nucleotide substitution rate and time of the most recent common ancestor ( $T_{MRCA}$ ) of  
484 American YFV strains were estimated using the Markov chain Monte Carlo (MCMC)  
485 algorithm implemented in the BEAST v1.8.3 package(59, 60) with BEAGLE (61) to  
486 improve run-time. The best-fit nucleotide substitution model, a relaxed uncorrelated  
487 lognormal molecular clock model(62), and a Bayesian Skyline coalescent tree prior(63)  
488 were used. The uncertainty of parameter estimates was assessed after excluding the initial  
489 10% of the run by calculating the Effective Sample Size (ESS) and the 95% Highest  
490 Probability Density (HPD) values, respectively, using TRACER v1.6 program(64).  
491 TreeAnnotator v1.7.5 (60) and FigTree v1.4.0 (65) were used to summarize the posterior  
492 tree distribution and to visualize the annotated Maximum Clade Credibility (MCC) tree,  
493 respectively.

494           **Acknowledgments**

495           To Monique Albuquerque Motta for the help on mosquito identification; Iule de  
496 Souza Bonelli, Marcelo Quinteka Gomes, Lidiane S. R. Menezes, Nathália D. Furtado,  
497 Stephanie O. D. da Cruz and Adalgiza as Silva Rocha for technical assistance; Heloisa  
498 Diniz and Leônidas Leite Santos for the help with illustrations; Alexandre Otávio  
499 Chieppe, Ana Paula Martins Brandão, Carlos Augusto Ferandes (Secretaria Estadual de  
500 Saúde do Rio de Janeiro) Alessandro Pecego M. Romano (Grupo Técnico de Vigilância  
501 de Arboviroses) and Roberta Gomes de Carvalho (Programa Nacional de Controle da  
502 Dengue) Brazilian Ministry of Health, Gilsa Aparecida P. Rodrigues (Secretaria de Saúde  
503 do Estado do Espírito Santo), Gilton Luiz Almada (Centro de Informação Estratégica de  
504 Vigilância em Saúde-ES) for the access to epidemiological data and support for the field  
505 work; Marilza L. Lange (Secretaria Municipal de Saúde, Municipality of Domingos  
506 Martins), Luciano L. Salles (Vigilância em Saúde, Municipality of Ibatiba) Agenor  
507 Barbosa de Oliveira, Marcelo dos Santos Rosário, Mauro Cesar Louzada, Max Mauro  
508 dos Santos Coelho for their assistance in field collections in Espírito Santo. Alexandre  
509 Bezerra de Souza and Vicente Klonowski (Atalaia Park), Romenique de Lemos Araújo,  
510 Luiz Ribeiro Nogueira and Raquel Giri Faria (Environmental Guard) and Macaé  
511 prefecture for their support in collecting samples. Raul Henrique Rafael and Ana Luiza  
512 Quijada for access to the Guapimirim sample; Cassia Schitino de Carvalho Gomes and  
513 Paulo Vitor Araújo Gomes for access to the Carmo samples.

514           **Competing interests**

515           The authors declare that no competing interests exist.

516

517 REFERENCES

- 518 1. Barnett, E. D., Yellow fever: epidemiology and prevention. *Clin Infect Dis* **44**,  
519 850-856 (2007), 10.1086/511869
- 520 2. Monath, T. P., Vasconcelos, P. F., Yellow fever. *J Clin Virol* **64**, 160-173 (2015),  
521 10.1016/j.jcv.2014.08.030
- 522 3. Weaver, S. C., Reisen, W. K., Present and future arboviral threats. *Antiviral Res*  
523 **85**, 328-345 (2010), 10.1016/j.antiviral.2009.10.008
- 524 4. Vasconcelos, P. F., Monath, T. P., Yellow Fever Remains a Potential Threat to  
525 Public Health. *Vector Borne Zoonotic Dis* **16**, 566-567 (2016),  
526 10.1089/vbz.2016.2031
- 527 5. Bryant, J. E., Holmes, E. C., Barrett, A. D., Out of Africa: a molecular perspective  
528 on the introduction of yellow fever virus into the Americas. *PLoS Pathog* **3**, e75  
529 (2007), 10.1371/journal.ppat.0030075
- 530 6. Mutebi, J. P., Wang, H., Li, L., Bryant, J. E., Barrett, A. D., Phylogenetic and  
531 evolutionary relationships among yellow fever virus isolates in Africa. *J Virol* **75**,  
532 6999-7008 (2001), 10.1128/JVI.75.15.6999-7008.2001
- 533 7. Staples, J. E., Monath, T. P., Yellow fever: 100 years of discovery. *JAMA* **300**,  
534 960-962 (2008), 10.1001/jama.300.8.960
- 535 8. Nunes, M. R., Palacios, G., Cardoso, J. F., Martins, L. C., Sousa, E. C., Jr., de  
536 Lima, C. P., Medeiros, D. B., Savji, N., Desai, A., Rodrigues, S. G., Carvalho, V.  
537 L., Lipkin, W. I., Vasconcelos, P. F., Genomic and phylogenetic characterization  
538 of Brazilian yellow fever virus strains. *J Virol* **86**, 13263-13271 (2012),  
539 10.1128/JVI.00565-12

- 540 9. Vasconcelos, P. F., Bryant, J. E., da Rosa, T. P., Tesh, R. B., Rodrigues, S. G.,  
541 Barrett, A. D., Genetic divergence and dispersal of yellow fever virus, Brazil.  
542 *Emerg Infect Dis* **10**, 1578-1584 (2004), 10.3201/eid1009.040197
- 543 10. Romano, A. P., Costa, Z. G., Ramos, D. G., Andrade, M. A., Jayme Vde, S.,  
544 Almeida, M. A., Vettorello, K. C., Mascheretti, M., Flannery, B., Yellow Fever  
545 outbreaks in unvaccinated populations, Brazil, 2008-2009. *PLoS Negl Trop Dis* **8**,  
546 e2740 (2014), 10.1371/journal.pntd.0002740
- 547 11. de Souza, R. P., Foster, P. G., Sallum, M. A., Coimbra, T. L., Maeda, A. Y.,  
548 Silveira, V. R., Moreno, E. S., da Silva, F. G., Rocco, I. M., Ferreira, I. B., Suzuki,  
549 A., Oshiro, F. M., Petrella, S. M., Pereira, L. E., Katz, G., Tengan, C. H., Siciliano,  
550 M. M., Dos Santos, C. L., Detection of a new yellow fever virus lineage within  
551 the South American genotype I in Brazil. *J Med Virol* **82**, 175-185 (2010),  
552 10.1002/jmv.21606
- 553 12. Mir, D., Delatorre, E., Bonaldo, M., Lourenço-de-Oliveira, R., Vicente, A. C.,  
554 Bello, G., Phylodynamics of Yellow Fever Virus in the Americas: new insights  
555 into the origin of the 2017 Brazilian outbreak. *Scientific Reports* **7**, (2017),  
556 10.1038/s41598-017-07873-7
- 557 13. Health, B. M. o., COES -Febre amarela. Informe 42/2-17, (2017),  
558 [http://portalarquivos.saude.gov.br/images/pdf/2017/maio/26/COES-FEBRE-](http://portalarquivos.saude.gov.br/images/pdf/2017/maio/26/COES-FEBRE-AMARELA-INFORME-42.pdf)  
559 [AMARELA-INFORME-42.pdf](http://portalarquivos.saude.gov.br/images/pdf/2017/maio/26/COES-FEBRE-AMARELA-INFORME-42.pdf)
- 560 14. Organization, P. A. H., Epidemiological Update -Yellow Fever, (2017),  
561 [http://www.paho.org/hq/index.php?option=com\\_docman&task=doc\\_view&Item](http://www.paho.org/hq/index.php?option=com_docman&task=doc_view&Itemid=270&gid=40841&lang=en)  
562 [id=270&gid=40841&lang=en](http://www.paho.org/hq/index.php?option=com_docman&task=doc_view&Itemid=270&gid=40841&lang=en)
- 563 15. Bonaldo, M. C., Gomez, M. M., Dos Santos, A. A., Abreu, F. V. S., Ferreira-de-  
564 Brito, A., Miranda, R. M., Castro, M. G., Lourenco-de-Oliveira, R., Genome

- 565 analysis of yellow fever virus of the ongoing outbreak in Brazil reveals  
566 polymorphisms. *Mem Inst Oswaldo Cruz* **112**, 447-451 (2017), 10.1590/0074-  
567 02760170134
- 568 16. Luo, D., Vasudevan, S. G., Lescar, J., The flavivirus NS2B-NS3 protease-helicase  
569 as a target for antiviral drug development. *Antiviral Res* **118**, 148-158 (2015),  
570 10.1016/j.antiviral.2015.03.014
- 571 17. Khromykh, A. A., Sedlak, P. L., Westaway, E. G., trans-Complementation  
572 analysis of the flavivirus Kunjin ns5 gene reveals an essential role for translation  
573 of its N-terminal half in RNA replication. *J Virol* **73**, 9247-9255 (1999),  
574 <https://www.ncbi.nlm.nih.gov/pubmed/10516033>)
- 575 18. Koonin, E. V., Computer-assisted identification of a putative methyltransferase  
576 domain in NS5 protein of flaviviruses and lambda 2 protein of reovirus. *J Gen  
577 Virol* **74 ( Pt 4)**, 733-740 (1993), 10.1099/0022-1317-74-4-733
- 578 19. Lu, G., Gong, P., Crystal Structure of the full-length Japanese encephalitis virus  
579 NS5 reveals a conserved methyltransferase-polymerase interface. *PLoS Pathog* **9**,  
580 e1003549 (2013), 10.1371/journal.ppat.1003549
- 581 20. El Sahili, A., Lescar, J., Dengue Virus Non-Structural Protein 5. *Viruses* **9**,  
582 (2017), 10.3390/v9040091
- 583 21. Laurent-Rolle, M., Morrison, J., Rajsbaum, R., Macleod, J. M. L., Pisanelli, G.,  
584 Pham, A., Ayllon, J., Miorin, L., Martinez, C., tenOever, B. R., Garcia-Sastre, A.,  
585 The interferon signaling antagonist function of yellow fever virus NS5 protein is  
586 activated by type I interferon. *Cell Host Microbe* **16**, 314-327 (2014),  
587 10.1016/j.chom.2014.07.015



- 588 22. Cumberworth, S. L., Clark, J. J., Kohl, A., Donald, C. L., Inhibition of type I  
589 interferon induction and signalling by mosquito-borne flaviviruses. *Cell*  
590 *Microbiol* **19**, (2017), 10.1111/cmi.12737
- 591 23. Dorigatti, I., Hamlet, A., Aguas, R., Cattarino, L., Cori, A., Donnelly, C. A.,  
592 Garske, T., Imai, N., Ferguson, N. M., International risk of yellow fever spread  
593 from the ongoing outbreak in Brazil, December 2016 to May 2017. *Euro Surveill*  
594 **22**, (2017), 10.2807/1560-7917.ES.2017.22.28.30572
- 595 24. Couto-Lima, D., Madec, Y., Bersot, M. I., Campos, S. S., Motta, M. A., Santos,  
596 F. B. D., Vazeille, M., Vasconcelos, P., Lourenco-de-Oliveira, R., Failloux, A. B.,  
597 Potential risk of re-emergence of urban transmission of Yellow Fever virus in  
598 Brazil facilitated by competent Aedes populations. *Sci Rep* **7**, 4848 (2017),  
599 10.1038/s41598-017-05186-3
- 600 25. Carpp, L. N., Galler, R., Bonaldo, M. C., Interaction between the yellow fever  
601 virus nonstructural protein NS3 and the host protein Alix contributes to the release  
602 of infectious particles. *Microbes Infect* **13**, 85-95 (2011),  
603 10.1016/j.micinf.2010.10.010
- 604 26. Patkar, C. G., Kuhn, R. J., Yellow Fever virus NS3 plays an essential role in virus  
605 assembly independent of its known enzymatic functions. *J Virol* **82**, 3342-3352  
606 (2008), 10.1128/JVI.02447-07
- 607 27. Teramoto, T., Balasubramanian, A., Choi, K. H., Padmanabhan, R., Serotype-  
608 specific interactions among functional domains of dengue virus 2 nonstructural  
609 proteins (NS) 5 and NS3 are crucial for viral RNA replication. *J Biol Chem* **292**,  
610 9465-9479 (2017), 10.1074/jbc.M117.775643
- 611 28. Lim, S. P., Koh, J. H., Seh, C. C., Liew, C. W., Davidson, A. D., Chua, L. S.,  
612 Chandrasekaran, R., Cornvik, T. C., Shi, P. Y., Lescar, J., A crystal structure of

- 613 the dengue virus non-structural protein 5 (NS5) polymerase delineates  
614 interdomain amino acid residues that enhance its thermostability and de novo  
615 initiation activities. *J Biol Chem* **288**, 31105-31114 (2013),  
616 10.1074/jbc.M113.508606
- 617 29. Zhao, Y., Soh, T. S., Zheng, J., Chan, K. W., Phoo, W. W., Lee, C. C., Tay, M.  
618 Y., Swaminathan, K., Cornvik, T. C., Lim, S. P., Shi, P. Y., Lescar, J., Vasudevan,  
619 S. G., Luo, D., A crystal structure of the Dengue virus NS5 protein reveals a novel  
620 inter-domain interface essential for protein flexibility and virus replication. *PLoS*  
621 *Pathog* **11**, e1004682 (2015), 10.1371/journal.ppat.1004682
- 622 30. Sironi, M., Forni, D., Clerici, M., Cagliani, R., Nonstructural Proteins Are  
623 Preferential Positive Selection Targets in Zika Virus and Related Flaviviruses.  
624 *PLoS Negl Trop Dis* **10**, e0004978 (2016), 10.1371/journal.pntd.0004978
- 625 31. Mathew, A., Townsley, E., Ennis, F. A., Elucidating the role of T cells in  
626 protection against and pathogenesis of dengue virus infections. *Future Microbiol*  
627 **9**, 411-425 (2014), 10.2217/fmb.13.171
- 628 32. Schlesinger, J. J., Foltzer, M., Chapman, S., The Fc portion of antibody to yellow  
629 fever virus NS1 is a determinant of protection against YF encephalitis in mice.  
630 *Virology* **192**, 132-141 (1993), 10.1006/viro.1993.1015
- 631 33. Wu, R. H., Tsai, M. H., Tsai, K. N., Tian, J. N., Wu, J. S., Wu, S. Y., Chern, J.  
632 H., Chen, C. H., Yueh, A., Mutagenesis of Dengue Virus Protein NS2A Revealed  
633 a Novel Domain Responsible for Virus-Induced Cytopathic Effect and  
634 Interactions between NS2A and NS2B Transmembrane Segments. *J Virol* **91**,  
635 (2017), 10.1128/JVI.01836-16
- 636 34. Le Breton, M., Meyniel-Schicklin, L., Deloire, A., Coutard, B., Canard, B., de  
637 Lamballerie, X., Andre, P., Rabourdin-Combe, C., Lotteau, V., Davoust, N.,

- 638 Flavivirus NS3 and NS5 proteins interaction network: a high-throughput yeast  
639 two-hybrid screen. *BMC Microbiol* **11**, 234 (2011), 10.1186/1471-2180-11-234
- 640 35. Zou, J., Lee le, T., Wang, Q. Y., Xie, X., Lu, S., Yau, Y. H., Yuan, Z., Geifman  
641 Shochat, S., Kang, C., Lescar, J., Shi, P. Y., Mapping the Interactions between the  
642 NS4B and NS3 proteins of dengue virus. *J Virol* **89**, 3471-3483 (2015),  
643 10.1128/JVI.03454-14
- 644 36. Faria, N. R., Azevedo, R., Kraemer, M. U. G., Souza, R., Cunha, M. S., Hill, S.  
645 C., Theze, J., Bonsall, M. B., Bowden, T. A., Rissanen, I., Rocco, I. M., Nogueira,  
646 J. S., Maeda, A. Y., Vasami, F., Macedo, F. L. L., Suzuki, A., Rodrigues, S. G.,  
647 Cruz, A. C. R., Nunes, B. T., Medeiros, D. B. A., Rodrigues, D. S. G., Queiroz,  
648 A. L. N., da Silva, E. V. P., Henriques, D. F., da Rosa, E. S. T., de Oliveira, C. S.,  
649 Martins, L. C., Vasconcelos, H. B., Casseb, L. M. N., Simith, D. B., Messina, J.  
650 P., Abade, L., Lourenco, J., Alcantara, L. C. J., de Lima, M. M., Giovanetti, M.,  
651 Hay, S. I., de Oliveira, R. S., Lemos, P. D. S., de Oliveira, L. F., de Lima, C. P.  
652 S., da Silva, S. P., de Vasconcelos, J. M., Franco, L., Cardoso, J. F., Vianez-Junior,  
653 J., Mir, D., Bello, G., Delatorre, E., Khan, K., Creatore, M., Coelho, G. E., de  
654 Oliveira, W. K., Tesh, R., Pybus, O. G., Nunes, M. R. T., Vasconcelos, P. F. C.,  
655 Zika virus in the Americas: Early epidemiological and genetic findings. *Science*  
656 **352**, 345-349 (2016), 10.1126/science.aaf5036
- 657 37. Consoli, R. A. G. B., Oliveira, R. L., *Principais mosquitos de importância*  
658 *sanitária no Brasil*. ( Editora FIOCRUZ, Rio de Janeiro, 1994), pp. 228.
- 659 38. Ferreira-de-Brito, A., Ribeiro, I. P., Miranda, R. M., Fernandes, R. S., Campos, S.  
660 S., Silva, K. A., Castro, M. G., Bonaldo, M. C., Brasil, P., Lourenco-de-Oliveira,  
661 R., First detection of natural infection of *Aedes aegypti* with Zika virus in Brazil

- 662 and throughout South America. *Mem Inst Oswaldo Cruz* **111**, 655-658 (2016),  
663 10.1590/0074-02760160332
- 664 39. Luo, D., Xu, T., Hunke, C., Gruber, G., Vasudevan, S. G., Lescar, J., Crystal  
665 structure of the NS3 protease-helicase from dengue virus. *J Virol* **82**, 173-183  
666 (2008), 10.1128/JVI.01788-07
- 667 40. Wu, J., Bera, A. K., Kuhn, R. J., Smith, J. L., Structure of the Flavivirus helicase:  
668 implications for catalytic activity, protein interactions, and proteolytic processing.  
669 *J Virol* **79**, 10268-10277 (2005), 10.1128/JVI.79.16.10268-10277.2005
- 670 41. Phoo, W. W., Li, Y., Zhang, Z., Lee, M. Y., Loh, Y. R., Tan, Y. B., Ng, E. Y.,  
671 Lescar, J., Kang, C., Luo, D., Structure of the NS2B-NS3 protease from Zika virus  
672 after self-cleavage. *Nat Commun* **7**, 13410 (2016), 10.1038/ncomms13410
- 673 42. Di Tommaso, P., Moretti, S., Xenarios, I., Orobicg, M., Montanyola, A., Chang,  
674 J. M., Taly, J. F., Notredame, C., T-Coffee: a web server for the multiple sequence  
675 alignment of protein and RNA sequences using structural information and  
676 homology extension. *Nucleic Acids Res* **39**, W13-17 (2011), 10.1093/nar/gkr245
- 677 43. Webb, B., Sali, A., in *Protein Structure Prediction*, D. Kihara, Ed. (Springer New  
678 York, New York, 2014), vol. 1137, pp. 1-15.
- 679 44. Abraham, M. K., Murtola, T., Schulz, R., Páll, S., Smith, J. C., Hess, H., Lindahl,  
680 E., GROMACS: High performance molecular simulations through multi-level  
681 parallelism from laptops to supercomputers. *SoftwareX* **1-2**, 19-25 (2015),  
682 10.1016/j.softx.2015.06.001
- 683 45. Lindorff-Larsen, K., Piana, S., Palmo, K., Maragakis, P., Klepeis, J. L., Dror, R.  
684 O., Shaw, D. E., Improved side-chain torsion potentials for the Amber ff99SB  
685 protein force field. *Proteins* **78**, 1950-1958 (2010), 10.1002/prot.22711

- 686 46. Benkert, P., Kunzli, M., Schwede, T., QMEAN server for protein model quality  
687 estimation. *Nucleic Acids Res* **37**, W510-514 (2009), 10.1093/nar/gkp322
- 688 47. Baker, N. A., Sept, D., Joseph, S., Holst, M. J., McCammon, J. A., Electrostatics  
689 of nanosystems: application to microtubules and the ribosome. *Proc Natl Acad*  
690 *Sci U S A* **98**, 10037-10041 (2001), 10.1073/pnas.181342398
- 691 48. Dolinsky, T. J., Nielsen, J. E., McCammon, J. A., Baker, N. A., PDB2PQR: an  
692 automated pipeline for the setup of Poisson-Boltzmann electrostatics calculations.  
693 *Nucleic Acids Res* **32**, W665-667 (2004), 10.1093/nar/gkh381
- 694 49. Bond, C. S., Schuttelkopf, A. W., ALINE: a WYSIWYG protein-sequence  
695 alignment editor for publication-quality alignments. *Acta Crystallogr D Biol*  
696 *Crystallogr* **65**, 510-512 (2009), 10.1107/S0907444909007835
- 697 50. Kumar, S., Stecher, G., Tamura, K., MEGA7: Molecular Evolutionary Genetics  
698 Analysis Version 7.0 for Bigger Datasets. *Mol Biol Evol* **33**, 1870-1874 (2016),  
699 10.1093/molbev/msw054
- 700 51. Saitou, N., Nei, M., The neighbor-joining method: a new method for  
701 reconstructing phylogenetic trees. *Mol Biol Evol* **4**, 406-425 (1987),  
702 <https://www.ncbi.nlm.nih.gov/pubmed/3447015>)
- 703 52. Kimura, M., A simple method for estimating evolutionary rates of base  
704 substitutions through comparative studies of nucleotide sequences. *J Mol Evol* **16**,  
705 111-120 (1980), <https://www.ncbi.nlm.nih.gov/pubmed/7463489>)
- 706 53. Felsenstein, J., Confidence Limits on Phylogenies: An Approach Using the  
707 Bootstrap. *Evolution* **39**, 783-791 (1985), 10.1111/j.1558-5646.1985.tb00420.x
- 708 54. Hall, T. A., A User-Friendly Biological Sequence Alignment Editor and Analysis  
709 Program for Windows 95/98/NT. *Nucleic Acids Symposium Series* **41**, 95-98  
710 (1999),

- 711 55. Delpont, W., Poon, A. F., Frost, S. D., Kosakovsky Pond, S. L., Datamonkey 2010:  
712 a suite of phylogenetic analysis tools for evolutionary biology. *Bioinformatics* **26**,  
713 2455-2457 (2010), 10.1093/bioinformatics/btq429
- 714 56. Pond, S. L., Frost, S. D., Datamonkey: rapid detection of selective pressure on  
715 individual sites of codon alignments. *Bioinformatics* **21**, 2531-2533 (2005),  
716 10.1093/bioinformatics/bti320
- 717 57. Kosakovsky Pond, S. L., Frost, S. D., Not so different after all: a comparison of  
718 methods for detecting amino acid sites under selection. *Mol Biol Evol* **22**, 1208-  
719 1222 (2005), 10.1093/molbev/msi105
- 720 58. Murrell, B., Wertheim, J. O., Moola, S., Weighill, T., Scheffler, K., Kosakovsky  
721 Pond, S. L., Detecting individual sites subject to episodic diversifying selection.  
722 *PLoS Genet* **8**, e1002764 (2012), 10.1371/journal.pgen.1002764
- 723 59. Murrell, B., Moola, S., Mabona, A., Weighill, T., Sheward, D., Kosakovsky Pond,  
724 S. L., Scheffler, K., FUBAR: a fast, unconstrained bayesian approximation for  
725 inferring selection. *Mol Biol Evol* **30**, 1196-1205 (2013), 10.1093/molbev/mst030
- 726 60. Drummond, A. J., Rambaut, A., BEAST: Bayesian evolutionary analysis by  
727 sampling trees. *BMC Evol Biol* **7**, 214 (2007), 10.1186/1471-2148-7-214
- 728 61. Drummond, A. J., Suchard, M. A., Xie, D., Rambaut, A., Bayesian phylogenetics  
729 with BEAUti and the BEAST 1.7. *Mol Biol Evol* **29**, 1969-1973 (2012),  
730 10.1093/molbev/mss075
- 731 62. Suchard, M. A., Rambaut, A., Many-core algorithms for statistical phylogenetics.  
732 *Bioinformatics* **25**, 1370-1376 (2009), 10.1093/bioinformatics/btp244
- 733 63. Drummond, A. J., Ho, S. Y., Phillips, M. J., Rambaut, A., Relaxed phylogenetics  
734 and dating with confidence. *PLoS Biol* **4**, e88 (2006),  
735 10.1371/journal.pbio.0040088

- 736 64. Drummond, A. J., Rambaut, A., Shapiro, B., Pybus, O. G., Bayesian coalescent  
737 inference of past population dynamics from molecular sequences. *Mol Biol Evol*  
738 **22**, 1185-1192 (2005), [10.1093/molbev/msi103](https://doi.org/10.1093/molbev/msi103)
- 739 65. Rambaut, A., Suchard, M., Drummond, A., Tracer v1.6. , (2013),  
740 [<http://tree.bio.ed.ac.uk/software/tracer/>](http://tree.bio.ed.ac.uk/software/tracer/)
- 741 66. Rambaut, A., FigTree v1.4., (2014), [<http://tree.bio.ed.ac.uk/software/figtree/>](http://tree.bio.ed.ac.uk/software/figtree/)
- 742

743 **Figure Legends**

744

745 Figure 1. The spatiotemporal spread of the yellow fever outbreak in Southeast Brazil from  
746 December 2016 to May 2017, and geographical origins of the yellow fever virus (YFV)  
747 samples according to states, river basins, hosts, and YFV sub-clades A (red) and B  
748 (green). The black square corresponds to the H189 sample whose only partial sequences  
749 of the YFV genome were obtained. Brazilian states: ES (Espírito Santo), MG (Minas  
750 Gerais), RJ (Rio de Janeiro) and SP: (São Paulo). Hatched areas correspond to the Great  
751 Metropolitan (GM) areas of Rio de Janeiro and Vitória.

752

753 Figure 2. Amino acid (aa) differences revealed by the alignment of the precursor  
754 polyproteins of 32 yellow fever (YF) viruses of the South America genotype I. On the  
755 left of the alignment data, the identification of lineage, sub-lineages and yellow fever  
756 virus (YFV) sequences are supplied. On the top of the alignment, the YF viral proteins  
757 positions are indicated along with the aa positions of amino acid differences. The orange-  
758 highlighted aa indicates the position of aa shared only by all YF sequences from the  
759 ongoing outbreak in Brazil. Amino acid residues highlighted in blue indicate aa changes  
760 present in YF strains from the current outbreak, first described in the current study. The  
761 “+” symbol indicates the sites under positive selection in the YF polyprotein.

762

763 Figure 3. Tridimensional models obtained by comparative modeling of the NS2B-NS3  
764 protein complex. Cartoon and surface electrostatic potential representation of R121K  
765 substitution (A, B), whole complex (C, D), and E88D substitution (E, F). The molecular  
766 surface is colored according to electrostatic potential, where red, white and blue



767 correspond to acidic, neutral and basic potentials, respectively. NS2B is shown in green.

768 Thick black lines represent hydrogen bonds (A, B, E, F)

769

770 Figure 4. Tridimensional structural models obtained by comparative modeling of NS5

771 protein. (A) Cartoon representation of NS5 protein. Amino acid substitutions and binding

772 site residues are shown in the sticks and colored according to the legend. (B) Cavities of

773 NS5 protein. Amino acid substitution sites are shown in red.

774

775 Figure 5. Codons of the yellow fever virus under positive selection in South America

776 genotype I (top), and West Africa genotype (bottom). The Y-axis represents normalized

777 dN-dS (non-synonymous substitutions minus synonymous substitution), and the X-axis

778 represents codon positions. The region between codon positions 2100 and 2850 is

779 highlighted inside a gray rectangle. Positively selected sites are shown with the color code

780 that appeared at the bottom of the figure.

781

782 Figure 6. Phylogenetic evolutionary analysis based on the yellow fever virus (YFV)

783 complete coding region. (A) Time-scaled Bayesian MCC tree of YFV CDS. The color

784 code is explained at the left of the figure. Names and accession numbers of the strains are

785 shown in Fig. 6 – Fig. Supplement 1. (B) YFV from the ongoing Southeast Brazilian

786 outbreak.

787

## 788 **Figures –Figure Supplement legends**

789

790 Figure 2- Figure Supplement 1. Phylogenetic analysis based on the prM/E junction region

791 of yellow fever virus (YFV) strains analyzed in the current study and YFV sequences

792 retrieved from the National Centre for Biotechnology Information (NCBI). Only  
793 bootstrap values up to 70% are shown. YFV genotypes are shown at the right side of the  
794 figure. The scale bar at the bottom represents 0.1 substitutions per nucleotide position  
795 (nt.subst/site). YFV from the 2017 ongoing Southeast Brazilian outbreak are marked with  
796 a filled triangle (mosquito strains), filled square (human strains) and filled circle (non-  
797 human primates strains).

798 Figure 2- Figure Supplement 2. Phylogenetic analysis based on the NS3 (A) and NS5 (B)  
799 encoding region of yellow fever virus (YFV) strains analyzed in the current study and 21  
800 YFV sequences retrieved from the National Centre for Biotechnology Information  
801 (NCBI). Only bootstrap values up to 70% are shown. The scale bar at the bottom  
802 represents 0.1 substitutions per nucleotide position (nt.subst/site). YFV from the 2017  
803 ongoing Southeast Brazilian outbreak are marked with an empty circle. South America  
804 genotype I and sub-clade 1E are shown at the right side.

805

806 Figure 3 - Figure Supplement 1. Multiple sequence alignment of the NS3 protein sequence  
807 belonging to the 2017 Brazilian yellow fever virus (strain ES505), 2010 Venezuelan 10A  
808 strain and the three templates used in comparative modeling experiment. Black and gray  
809 filled positions of the alignment represent fully and partially conserved residues,  
810 respectively. Red outline highlights the amino acid found in the 2017 Brazilian strain.  
811 Green outline highlights the positions of the active site residues.

812

813 Figure 4 - Figure Supplement 1. Multiple sequence alignment of the NS5 protein  
814 sequence belonging to the 2017 Brazilian yellow fever virus (strain ES505), 2010  
815 Venezuelan 10A strain and the template used in comparative modeling experiment. Black  
816 and gray filled positions of the alignment represent fully and partially conserved residues,

817 respectively. Red outline highlights the amino acid found in the 2017 Brazilian strain.  
818 Pink, yellow and green outlines highlight the positions of residues found in the active site,  
819 GTP binding site, and SAM binding site, respectively.

820

821 Figure 4 - Figure Supplement 2. The surface electrostatic potential of NS5 protein. The  
822 molecular surface is colored according to electrostatic potential, where red, white and  
823 blue correspond to acidic, neutral and basic potentials, respectively.

824 Figure 4 - Figure Supplement 3. Root mean square fluctuation plots of the final 150 ns of  
825 each NS5 MD production run. The systems were run in replicates with distinct random  
826 seeds for initial velocities generation. Temperatures of 297 and 310 K were used. The last  
827 column (Relative) represents the subtraction of the calculated fluctuations of 2010 from  
828 the 2017 values. The vertical dashed line marks the hinge domain. Fluctuations were  
829 calculated with GROMACS software and plotted using R.

830

831 Figure 5 - Figure Supplement 1. Positively selected sites in yellow fever virus (YFV)  
832 polyprotein from South American genotype I (top) and West African (bottom). Sites,  
833 where the non-synonymous substitution occurred in YFV 2017 (top) are shown with a  
834 gray shadow. a- Sites supported by one method (FEL or MEME); b- sites supported by  
835 two methods (MEME/FUBAR or fel/fubar); c- site supported by three methods  
836 FEL/MEME/FUBAR.

837

838 Figure 6 – Figure supplement 1.. Yellow fever virus strains used in the Time-scaled  
839 Bayesian MCC tree.

840

Table 1. YFV samples collected in the 2017 Brazilian outbreak

| Host                                                | Sample ID - (Genbank accession number) | Date of collection | Local                          | geographic coordinates    |
|-----------------------------------------------------|----------------------------------------|--------------------|--------------------------------|---------------------------|
| <i>Hg. leucocelaenus</i>                            | PA193 - (MF423373)                     | 21/02/2017         | Areinha, Domingos Martins - ES | 20°17'08"S 40°50'15" W    |
| <i>Hg. janthinomys</i>                              | PA196 - (MF423374)                     | 23/02/2017         | Areinha, Domingos Martins - ES | 20°17'08"S 40°50'15"W     |
| <i>Alouatta clamitans</i><br>(howler-monkey)        | ES-504* - ( KY885000)                  | 20/02/2017         | Areinha, Domingos Martins - ES | 20°17'08"S 40°50'15"W     |
|                                                     | ES-505* - ( KY885001)                  | 22/02/2017         | Areinha, Domingos Martins - ES | 20°17'08"S 40°50'15"W     |
|                                                     | RJ87 - (MF423375)                      | 04/04/2017         | Atalaia, Macaé - RJ            | 22°18'31.6"S 42°00'01.7"W |
|                                                     | RJ94 - (MF423376)                      | 13/04/2017         | Cabeceira do Sana, Macaé - RJ  | 22°14'23.1"S 42°09'05.0"W |
|                                                     | RJ95 - (MF423377)                      | 19/04/2017         | Santa Fé, Carmo - RJ           | 21°53'05.0"S 42°32'29.7"W |
|                                                     | RJ96 - (MF423378)                      | 19/04/2017         | Santa Fé, Carmo - RJ           | 21°53'05.0"S 42°32'29.7"W |
| <i>Callithrix jacchus/penicillata</i><br>(marmoset) | RJ97- (MF538785)                       | 21/04/2017         | Araras, Petrópolis - RJ        | 22°23'51.1"S 43°10'56.5"W |
|                                                     | RJ104 - (MF538786)                     | 05/06/2017         | Caneca Fina, Guapimirim - RJ   | 22°29'35.9"S 42°56'58.9"W |
| Human cases                                         | H189 **                                | 18/04/2017         | Bananal, Maricá - RJ           | 22°55'25.3"S 42°43'17.1"W |
|                                                     | H190 - (MF538782)                      | 16/03/2017         | São Fidélis - RJ               | 21°38'17.2"S 41°45'49.2"W |
|                                                     | H191 - (MF538783)                      | 18/03/2017         | Casimiro de Abreu - RJ         | 22°29'10.5"S 42°12'06.2"W |
|                                                     | H196 - (MF538784)                      | 26/02/2017         | Porciúncula - RJ               | 20°49'17.5"S 41°54'38.6"W |
|                                                     | H199 - (MF434851)                      | 25/04/2017         | Silva Jardim - RJ              | 22°27'42.9"S 42°18'28.6"W |

\*YFV ES504 and ES505 previously described (13); \*\* partial genome sequence



YFV Polyprotein

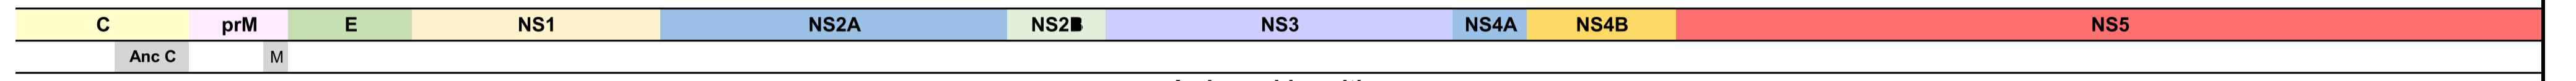

Amino acid position

| Seq Id / Strain / Country / Year | Host                     | Amino acid position          |                                                                                                                       |                                                                                                                       |                                                                                                                       |                                                                                       |   |   |   |   |    |    |    |    |    |    |    |    |    |    |    |    |    |    |    |    |    |    |    |    |    |    |    |    |    |    |    |    |    |    |    |    |    |    |    |    |    |    |    |    |    |    |    |    |    |    |    |    |    |    |    |    |    |    |    |    |    |    |    |    |    |    |    |    |    |    |    |    |    |    |    |    |    |    |    |    |    |    |    |    |    |    |    |    |    |    |    |    |    |    |     |     |     |     |     |     |     |     |     |     |     |     |     |     |     |     |     |     |     |     |     |     |     |     |     |     |     |     |     |     |     |     |     |     |     |     |     |     |     |     |     |     |     |     |     |     |     |     |     |     |     |     |     |     |     |     |     |     |     |     |     |     |     |     |     |     |     |     |     |     |     |     |     |     |     |     |     |     |     |     |     |     |     |     |     |     |     |     |     |     |     |     |     |     |     |     |     |     |     |     |     |     |     |     |     |     |     |     |     |     |     |     |     |     |     |     |     |     |     |     |     |     |     |     |     |     |     |     |     |     |     |     |     |     |     |     |     |     |     |     |     |     |     |     |     |     |     |     |     |     |     |     |     |     |     |     |     |     |     |     |     |     |     |     |     |     |     |     |     |     |     |     |     |     |     |     |     |     |     |     |     |     |     |     |     |     |     |     |     |     |     |     |     |     |     |     |     |     |     |     |     |     |     |     |     |     |     |     |     |     |     |     |     |     |     |     |     |     |     |     |     |     |     |     |     |     |     |     |     |     |     |     |     |     |     |     |     |     |     |     |     |     |     |     |     |     |     |     |     |     |     |     |     |     |     |     |     |     |     |     |     |     |     |     |     |     |     |     |     |     |     |     |     |     |     |     |     |     |     |     |     |     |     |     |     |     |     |     |     |     |     |     |     |     |     |     |     |     |     |     |     |     |     |     |     |     |     |     |     |     |     |     |     |     |     |     |     |     |     |     |     |     |     |     |     |     |     |     |     |     |     |     |     |     |     |     |     |     |     |     |     |     |     |     |     |     |     |     |     |     |     |     |     |     |     |     |     |     |     |     |     |     |     |     |     |     |     |     |     |     |     |     |     |     |     |     |     |     |     |     |     |     |     |     |     |     |     |     |     |     |     |     |     |     |     |     |     |     |     |     |     |     |     |     |     |     |     |     |     |     |     |     |     |     |     |     |     |     |     |     |     |     |     |     |     |     |     |     |     |     |     |     |     |     |     |     |     |     |     |     |     |     |     |     |     |     |     |     |     |     |     |     |     |     |     |     |     |     |     |     |     |     |     |     |     |     |     |     |     |     |     |     |     |     |     |     |     |     |     |     |     |     |     |     |     |     |     |     |     |     |     |     |     |     |     |     |     |     |     |     |     |     |     |     |     |     |     |     |     |     |     |     |     |     |     |     |     |     |     |     |     |     |     |     |     |     |     |     |     |     |     |     |     |     |     |     |     |     |     |     |     |     |     |     |     |     |     |     |     |     |     |     |     |     |     |     |     |     |     |     |     |     |     |     |     |     |     |     |     |     |     |     |     |     |     |     |     |     |     |     |     |     |     |     |     |     |     |     |     |     |     |     |     |     |     |     |     |     |     |     |     |     |     |     |     |     |     |     |     |     |     |     |     |     |     |     |     |     |     |     |     |     |     |     |     |     |     |     |     |     |     |     |     |     |     |     |     |     |     |     |     |     |     |     |     |     |     |     |     |     |     |     |     |     |     |     |     |     |     |     |     |     |     |     |     |     |     |     |     |     |     |     |     |     |     |     |     |     |     |     |     |     |     |     |     |     |     |     |     |     |     |     |     |     |     |     |     |     |     |     |     |     |     |     |     |     |     |     |     |     |     |     |     |     |     |     |     |     |     |     |     |     |     |     |     |     |     |     |     |     |     |     |     |     |     |     |     |     |     |     |     |     |     |     |     |     |     |     |     |     |     |     |     |     |     |     |     |     |     |     |     |     |     |     |     |     |     |     |     |     |     |     |     |     |     |     |     |     |     |     |     |     |     |     |     |     |     |     |     |     |     |     |     |     |     |     |     |     |     |     |     |     |     |     |     |     |     |     |     |     |     |     |     |     |     |     |     |     |     |     |     |     |     |     |     |     |     |     |     |     |     |     |     |     |     |     |     |     |     |     |     |     |     |     |     |     |     |     |     |     |     |     |     |     |     |     |     |     |     |     |     |     |     |     |     |     |     |     |     |     |     |     |     |     |     |     |     |     |     |     |     |     |     |     |     |     |     |     |     |     |     |     |     |     |     |     |     |     |     |
|----------------------------------|--------------------------|------------------------------|-----------------------------------------------------------------------------------------------------------------------|-----------------------------------------------------------------------------------------------------------------------|-----------------------------------------------------------------------------------------------------------------------|---------------------------------------------------------------------------------------|---|---|---|---|----|----|----|----|----|----|----|----|----|----|----|----|----|----|----|----|----|----|----|----|----|----|----|----|----|----|----|----|----|----|----|----|----|----|----|----|----|----|----|----|----|----|----|----|----|----|----|----|----|----|----|----|----|----|----|----|----|----|----|----|----|----|----|----|----|----|----|----|----|----|----|----|----|----|----|----|----|----|----|----|----|----|----|----|----|----|----|----|----|----|-----|-----|-----|-----|-----|-----|-----|-----|-----|-----|-----|-----|-----|-----|-----|-----|-----|-----|-----|-----|-----|-----|-----|-----|-----|-----|-----|-----|-----|-----|-----|-----|-----|-----|-----|-----|-----|-----|-----|-----|-----|-----|-----|-----|-----|-----|-----|-----|-----|-----|-----|-----|-----|-----|-----|-----|-----|-----|-----|-----|-----|-----|-----|-----|-----|-----|-----|-----|-----|-----|-----|-----|-----|-----|-----|-----|-----|-----|-----|-----|-----|-----|-----|-----|-----|-----|-----|-----|-----|-----|-----|-----|-----|-----|-----|-----|-----|-----|-----|-----|-----|-----|-----|-----|-----|-----|-----|-----|-----|-----|-----|-----|-----|-----|-----|-----|-----|-----|-----|-----|-----|-----|-----|-----|-----|-----|-----|-----|-----|-----|-----|-----|-----|-----|-----|-----|-----|-----|-----|-----|-----|-----|-----|-----|-----|-----|-----|-----|-----|-----|-----|-----|-----|-----|-----|-----|-----|-----|-----|-----|-----|-----|-----|-----|-----|-----|-----|-----|-----|-----|-----|-----|-----|-----|-----|-----|-----|-----|-----|-----|-----|-----|-----|-----|-----|-----|-----|-----|-----|-----|-----|-----|-----|-----|-----|-----|-----|-----|-----|-----|-----|-----|-----|-----|-----|-----|-----|-----|-----|-----|-----|-----|-----|-----|-----|-----|-----|-----|-----|-----|-----|-----|-----|-----|-----|-----|-----|-----|-----|-----|-----|-----|-----|-----|-----|-----|-----|-----|-----|-----|-----|-----|-----|-----|-----|-----|-----|-----|-----|-----|-----|-----|-----|-----|-----|-----|-----|-----|-----|-----|-----|-----|-----|-----|-----|-----|-----|-----|-----|-----|-----|-----|-----|-----|-----|-----|-----|-----|-----|-----|-----|-----|-----|-----|-----|-----|-----|-----|-----|-----|-----|-----|-----|-----|-----|-----|-----|-----|-----|-----|-----|-----|-----|-----|-----|-----|-----|-----|-----|-----|-----|-----|-----|-----|-----|-----|-----|-----|-----|-----|-----|-----|-----|-----|-----|-----|-----|-----|-----|-----|-----|-----|-----|-----|-----|-----|-----|-----|-----|-----|-----|-----|-----|-----|-----|-----|-----|-----|-----|-----|-----|-----|-----|-----|-----|-----|-----|-----|-----|-----|-----|-----|-----|-----|-----|-----|-----|-----|-----|-----|-----|-----|-----|-----|-----|-----|-----|-----|-----|-----|-----|-----|-----|-----|-----|-----|-----|-----|-----|-----|-----|-----|-----|-----|-----|-----|-----|-----|-----|-----|-----|-----|-----|-----|-----|-----|-----|-----|-----|-----|-----|-----|-----|-----|-----|-----|-----|-----|-----|-----|-----|-----|-----|-----|-----|-----|-----|-----|-----|-----|-----|-----|-----|-----|-----|-----|-----|-----|-----|-----|-----|-----|-----|-----|-----|-----|-----|-----|-----|-----|-----|-----|-----|-----|-----|-----|-----|-----|-----|-----|-----|-----|-----|-----|-----|-----|-----|-----|-----|-----|-----|-----|-----|-----|-----|-----|-----|-----|-----|-----|-----|-----|-----|-----|-----|-----|-----|-----|-----|-----|-----|-----|-----|-----|-----|-----|-----|-----|-----|-----|-----|-----|-----|-----|-----|-----|-----|-----|-----|-----|-----|-----|-----|-----|-----|-----|-----|-----|-----|-----|-----|-----|-----|-----|-----|-----|-----|-----|-----|-----|-----|-----|-----|-----|-----|-----|-----|-----|-----|-----|-----|-----|-----|-----|-----|-----|-----|-----|-----|-----|-----|-----|-----|-----|-----|-----|-----|-----|-----|-----|-----|-----|-----|-----|-----|-----|-----|-----|-----|-----|-----|-----|-----|-----|-----|-----|-----|-----|-----|-----|-----|-----|-----|-----|-----|-----|-----|-----|-----|-----|-----|-----|-----|-----|-----|-----|-----|-----|-----|-----|-----|-----|-----|-----|-----|-----|-----|-----|-----|-----|-----|-----|-----|-----|-----|-----|-----|-----|-----|-----|-----|-----|-----|-----|-----|-----|-----|-----|-----|-----|-----|-----|-----|-----|-----|-----|-----|-----|-----|-----|-----|-----|-----|-----|-----|-----|-----|-----|-----|-----|-----|-----|-----|-----|-----|-----|-----|-----|-----|-----|-----|-----|-----|-----|-----|-----|-----|-----|-----|-----|-----|-----|-----|-----|-----|-----|-----|-----|-----|-----|-----|-----|-----|-----|-----|-----|-----|-----|-----|-----|-----|-----|-----|-----|-----|-----|-----|-----|-----|-----|-----|-----|-----|-----|-----|-----|-----|-----|-----|-----|-----|-----|-----|-----|-----|-----|-----|-----|-----|-----|-----|-----|-----|-----|-----|-----|-----|-----|-----|-----|-----|-----|-----|-----|-----|-----|-----|-----|-----|-----|-----|-----|-----|-----|-----|-----|-----|-----|-----|-----|-----|-----|-----|-----|-----|-----|-----|-----|-----|-----|-----|-----|-----|-----|-----|-----|-----|-----|-----|-----|-----|-----|-----|-----|-----|-----|-----|-----|-----|-----|-----|-----|-----|-----|-----|-----|-----|-----|-----|-----|-----|-----|-----|-----|-----|-----|-----|-----|-----|-----|-----|-----|-----|-----|-----|-----|-----|-----|-----|-----|-----|-----|-----|-----|-----|-----|-----|-----|-----|-----|-----|-----|-----|-----|-----|-----|-----|-----|-----|-----|-----|-----|-----|-----|-----|-----|-----|-----|-----|-----|-----|-----|-----|-----|-----|-----|-----|-----|-----|-----|-----|-----|-----|-----|-----|-----|-----|-----|-----|-----|-----|-----|-----|-----|-----|-----|-----|-----|-----|-----|-----|-----|-----|-----|-----|-----|-----|-----|-----|-----|-----|-----|-----|-----|-----|-----|-----|-----|-----|-----|-----|-----|-----|-----|-----|-----|-----|-----|-----|
|                                  |                          | 1                            | 2                                                                                                                     | 3                                                                                                                     | 4                                                                                                                     | 5                                                                                     | 6 | 7 | 8 | 9 | 10 | 11 | 12 | 13 | 14 | 15 | 16 | 17 | 18 | 19 | 20 | 21 | 22 | 23 | 24 | 25 | 26 | 27 | 28 | 29 | 30 | 31 | 32 | 33 | 34 | 35 | 36 | 37 | 38 | 39 | 40 | 41 | 42 | 43 | 44 | 45 | 46 | 47 | 48 | 49 | 50 | 51 | 52 | 53 | 54 | 55 | 56 | 57 | 58 | 59 | 60 | 61 | 62 | 63 | 64 | 65 | 66 | 67 | 68 | 69 | 70 | 71 | 72 | 73 | 74 | 75 | 76 | 77 | 78 | 79 | 80 | 81 | 82 | 83 | 84 | 85 | 86 | 87 | 88 | 89 | 90 | 91 | 92 | 93 | 94 | 95 | 96 | 97 | 98 | 99 | 100 | 101 | 102 | 103 | 104 | 105 | 106 | 107 | 108 | 109 | 110 | 111 | 112 | 113 | 114 | 115 | 116 | 117 | 118 | 119 | 120 | 121 | 122 | 123 | 124 | 125 | 126 | 127 | 128 | 129 | 130 | 131 | 132 | 133 | 134 | 135 | 136 | 137 | 138 | 139 | 140 | 141 | 142 | 143 | 144 | 145 | 146 | 147 | 148 | 149 | 150 | 151 | 152 | 153 | 154 | 155 | 156 | 157 | 158 | 159 | 160 | 161 | 162 | 163 | 164 | 165 | 166 | 167 | 168 | 169 | 170 | 171 | 172 | 173 | 174 | 175 | 176 | 177 | 178 | 179 | 180 | 181 | 182 | 183 | 184 | 185 | 186 | 187 | 188 | 189 | 190 | 191 | 192 | 193 | 194 | 195 | 196 | 197 | 198 | 199 | 200 | 201 | 202 | 203 | 204 | 205 | 206 | 207 | 208 | 209 | 210 | 211 | 212 | 213 | 214 | 215 | 216 | 217 | 218 | 219 | 220 | 221 | 222 | 223 | 224 | 225 | 226 | 227 | 228 | 229 | 230 | 231 | 232 | 233 | 234 | 235 | 236 | 237 | 238 | 239 | 240 | 241 | 242 | 243 | 244 | 245 | 246 | 247 | 248 | 249 | 250 | 251 | 252 | 253 | 254 | 255 | 256 | 257 | 258 | 259 | 260 | 261 | 262 | 263 | 264 | 265 | 266 | 267 | 268 | 269 | 270 | 271 | 272 | 273 | 274 | 275 | 276 | 277 | 278 | 279 | 280 | 281 | 282 | 283 | 284 | 285 | 286 | 287 | 288 | 289 | 290 | 291 | 292 | 293 | 294 | 295 | 296 | 297 | 298 | 299 | 300 | 301 | 302 | 303 | 304 | 305 | 306 | 307 | 308 | 309 | 310 | 311 | 312 | 313 | 314 | 315 | 316 | 317 | 318 | 319 | 320 | 321 | 322 | 323 | 324 | 325 | 326 | 327 | 328 | 329 | 330 | 331 | 332 | 333 | 334 | 335 | 336 | 337 | 338 | 339 | 340 | 341 | 342 | 343 | 344 | 345 | 346 | 347 | 348 | 349 | 350 | 351 | 352 | 353 | 354 | 355 | 356 | 357 | 358 | 359 | 360 | 361 | 362 | 363 | 364 | 365 | 366 | 367 | 368 | 369 | 370 | 371 | 372 | 373 | 374 | 375 | 376 | 377 | 378 | 379 | 380 | 381 | 382 | 383 | 384 | 385 | 386 | 387 | 388 | 389 | 390 | 391 | 392 | 393 | 394 | 395 | 396 | 397 | 398 | 399 | 400 | 401 | 402 | 403 | 404 | 405 | 406 | 407 | 408 | 409 | 410 | 411 | 412 | 413 | 414 | 415 | 416 | 417 | 418 | 419 | 420 | 421 | 422 | 423 | 424 | 425 | 426 | 427 | 428 | 429 | 430 | 431 | 432 | 433 | 434 | 435 | 436 | 437 | 438 | 439 | 440 | 441 | 442 | 443 | 444 | 445 | 446 | 447 | 448 | 449 | 450 | 451 | 452 | 453 | 454 | 455 | 456 | 457 | 458 | 459 | 460 | 461 | 462 | 463 | 464 | 465 | 466 | 467 | 468 | 469 | 470 | 471 | 472 | 473 | 474 | 475 | 476 | 477 | 478 | 479 | 480 | 481 | 482 | 483 | 484 | 485 | 486 | 487 | 488 | 489 | 490 | 491 | 492 | 493 | 494 | 495 | 496 | 497 | 498 | 499 | 500 | 501 | 502 | 503 | 504 | 505 | 506 | 507 | 508 | 509 | 510 | 511 | 512 | 513 | 514 | 515 | 516 | 517 | 518 | 519 | 520 | 521 | 522 | 523 | 524 | 525 | 526 | 527 | 528 | 529 | 530 | 531 | 532 | 533 | 534 | 535 | 536 | 537 | 538 | 539 | 540 | 541 | 542 | 543 | 544 | 545 | 546 | 547 | 548 | 549 | 550 | 551 | 552 | 553 | 554 | 555 | 556 | 557 | 558 | 559 | 560 | 561 | 562 | 563 | 564 | 565 | 566 | 567 | 568 | 569 | 570 | 571 | 572 | 573 | 574 | 575 | 576 | 577 | 578 | 579 | 580 | 581 | 582 | 583 | 584 | 585 | 586 | 587 | 588 | 589 | 590 | 591 | 592 | 593 | 594 | 595 | 596 | 597 | 598 | 599 | 600 | 601 | 602 | 603 | 604 | 605 | 606 | 607 | 608 | 609 | 610 | 611 | 612 | 613 | 614 | 615 | 616 | 617 | 618 | 619 | 620 | 621 | 622 | 623 | 624 | 625 | 626 | 627 | 628 | 629 | 630 | 631 | 632 | 633 | 634 | 635 | 636 | 637 | 638 | 639 | 640 | 641 | 642 | 643 | 644 | 645 | 646 | 647 | 648 | 649 | 650 | 651 | 652 | 653 | 654 | 655 | 656 | 657 | 658 | 659 | 660 | 661 | 662 | 663 | 664 | 665 | 666 | 667 | 668 | 669 | 670 | 671 | 672 | 673 | 674 | 675 | 676 | 677 | 678 | 679 | 680 | 681 | 682 | 683 | 684 | 685 | 686 | 687 | 688 | 689 | 690 | 691 | 692 | 693 | 694 | 695 | 696 | 697 | 698 | 699 | 700 | 701 | 702 | 703 | 704 | 705 | 706 | 707 | 708 | 709 | 710 | 711 | 712 | 713 | 714 | 715 | 716 | 717 | 718 | 719 | 720 | 721 | 722 | 723 | 724 | 725 | 726 | 727 | 728 | 729 | 730 | 731 | 732 | 733 | 734 | 735 | 736 | 737 | 738 | 739 | 740 | 741 | 742 | 743 | 744 | 745 | 746 | 747 | 748 | 749 | 750 | 751 | 752 | 753 | 754 | 755 | 756 | 757 | 758 | 759 | 760 | 761 | 762 | 763 | 764 | 765 | 766 | 767 | 768 | 769 | 770 | 771 | 772 | 773 | 774 | 775 | 776 | 777 | 778 | 779 | 780 | 781 | 782 | 783 | 784 | 785 | 786 | 787 | 788 | 789 | 790 | 791 | 792 | 793 | 794 | 795 | 796 | 797 | 798 | 799 | 800 | 801 | 802 | 803 | 804 | 805 | 806 | 807 | 808 | 809 | 810 | 811 | 812 | 813 | 814 | 815 | 816 | 817 | 818 | 819 | 820 | 821 | 822 | 823 | 824 | 825 | 826 | 827 | 828 | 829 | 830 | 831 | 832 | 833 | 834 | 835 | 836 | 837 | 838 | 839 | 840 | 841 | 842 | 843 | 844 | 845 | 846 | 847 | 848 | 849 | 850 | 851 | 852 | 853 | 854 | 855 | 856 | 857 | 858 | 859 | 860 | 861 | 862 | 863 | 864 | 865 | 866 | 867 | 868 | 869 | 870 | 871 | 872 | 873 | 874 | 875 | 876 | 877 | 878 | 879 | 880 | 881 | 882 | 883 | 884 | 885 | 886 | 887 | 888 | 889 | 890 | 891 | 892 | 893 | 894 | 895 | 896 | 897 | 898 | 899 | 900 | 901 | 902 | 903 | 904 | 905 | 906 | 907 | 908 | 909 | 910 | 911 | 912 | 913 | 914 | 915 | 916 | 917 | 918 | 919 | 920 | 921 | 922 | 923 | 924 | 925 | 926 | 927 | 928 | 929 | 930 | 931 | 932 | 933 | 934 | 935 | 936 | 937 | 938 | 939 | 940 | 941 | 942 | 943 | 944 | 945 | 946 | 947 | 948 | 949 | 950 | 951 | 952 | 953 | 954 | 955 | 956 | 957 | 958 | 959 | 960 | 961 | 962 | 963 | 964 | 965 | 966 | 967 | 968 | 969 | 970 | 971 | 972 | 973 | 974 | 975 | 976 | 977 | 978 | 979 | 980 | 981 | 982 | 983 | 984 | 985 | 986 | 987 | 988 | 989 | 990 | 991 | 992 | 993 | 994 | 995 | 996 | 997 | 998 |
| Old lineage                      | 1B                       | JF912180/BeH394880/BRA/1981  | Human                                                                                                                 | K I A K V V V R N P A T A K M S G I N A P K N V P K I I A V I T N T M V V A V S R A F A K E R Q P I A S N T S R V T V | F I I H A N K T R K E T V R V D T P G A V N K I A V S I A V K A N I V A K R D I M H L                                 |                                                                                       |   |   |   |   |    |    |    |    |    |    |    |    |    |    |    |    |    |    |    |    |    |    |    |    |    |    |    |    |    |    |    |    |    |    |    |    |    |    |    |    |    |    |    |    |    |    |    |    |    |    |    |    |    |    |    |    |    |    |    |    |    |    |    |    |    |    |    |    |    |    |    |    |    |    |    |    |    |    |    |    |    |    |    |    |    |    |    |    |    |    |    |    |    |    |     |     |     |     |     |     |     |     |     |     |     |     |     |     |     |     |     |     |     |     |     |     |     |     |     |     |     |     |     |     |     |     |     |     |     |     |     |     |     |     |     |     |     |     |     |     |     |     |     |     |     |     |     |     |     |     |     |     |     |     |     |     |     |     |     |     |     |     |     |     |     |     |     |     |     |     |     |     |     |     |     |     |     |     |     |     |     |     |     |     |     |     |     |     |     |     |     |     |     |     |     |     |     |     |     |     |     |     |     |     |     |     |     |     |     |     |     |     |     |     |     |     |     |     |     |     |     |     |     |     |     |     |     |     |     |     |     |     |     |     |     |     |     |     |     |     |     |     |     |     |     |     |     |     |     |     |     |     |     |     |     |     |     |     |     |     |     |     |     |     |     |     |     |     |     |     |     |     |     |     |     |     |     |     |     |     |     |     |     |     |     |     |     |     |     |     |     |     |     |     |     |     |     |     |     |     |     |     |     |     |     |     |     |     |     |     |     |     |     |     |     |     |     |     |     |     |     |     |     |     |     |     |     |     |     |     |     |     |     |     |     |     |     |     |     |     |     |     |     |     |     |     |     |     |     |     |     |     |     |     |     |     |     |     |     |     |     |     |     |     |     |     |     |     |     |     |     |     |     |     |     |     |     |     |     |     |     |     |     |     |     |     |     |     |     |     |     |     |     |     |     |     |     |     |     |     |     |     |     |     |     |     |     |     |     |     |     |     |     |     |     |     |     |     |     |     |     |     |     |     |     |     |     |     |     |     |     |     |     |     |     |     |     |     |     |     |     |     |     |     |     |     |     |     |     |     |     |     |     |     |     |     |     |     |     |     |     |     |     |     |     |     |     |     |     |     |     |     |     |     |     |     |     |     |     |     |     |     |     |     |     |     |     |     |     |     |     |     |     |     |     |     |     |     |     |     |     |     |     |     |     |     |     |     |     |     |     |     |     |     |     |     |     |     |     |     |     |     |     |     |     |     |     |     |     |     |     |     |     |     |     |     |     |     |     |     |     |     |     |     |     |     |     |     |     |     |     |     |     |     |     |     |     |     |     |     |     |     |     |     |     |     |     |     |     |     |     |     |     |     |     |     |     |     |     |     |     |     |     |     |     |     |     |     |     |     |     |     |     |     |     |     |     |     |     |     |     |     |     |     |     |     |     |     |     |     |     |     |     |     |     |     |     |     |     |     |     |     |     |     |     |     |     |     |     |     |     |     |     |     |     |     |     |     |     |     |     |     |     |     |     |     |     |     |     |     |     |     |     |     |     |     |     |     |     |     |     |     |     |     |     |     |     |     |     |     |     |     |     |     |     |     |     |     |     |     |     |     |     |     |     |     |     |     |     |     |     |     |     |     |     |     |     |     |     |     |     |     |     |     |     |     |     |     |     |     |     |     |     |     |     |     |     |     |     |     |     |     |     |     |     |     |     |     |     |     |     |     |     |     |     |     |     |     |     |     |     |     |     |     |     |     |     |     |     |     |     |     |     |     |     |     |     |     |     |     |     |     |     |     |     |     |     |     |     |     |     |     |     |     |     |     |     |     |     |     |     |     |     |     |     |     |     |     |     |     |     |     |     |     |     |     |     |     |     |     |     |     |     |     |     |     |     |     |     |     |     |     |     |     |     |     |     |     |     |     |     |     |     |     |     |     |     |     |     |     |     |     |     |     |     |     |     |     |     |     |     |     |     |     |     |     |     |     |     |     |     |     |     |     |     |     |     |     |     |     |     |     |     |     |     |     |     |     |     |     |     |     |     |     |     |     |     |     |     |     |     |     |     |     |     |     |     |     |     |     |     |     |     |     |     |     |     |     |     |     |     |     |     |     |     |     |     |     |     |     |     |     |     |     |     |     |     |     |     |     |     |     |     |     |     |     |     |     |     |     |     |     |     |     |     |     |     |     |     |     |     |     |     |     |     |     |     |     |     |     |     |     |     |     |     |     |     |     |     |     |     |     |     |     |     |     |     |     |     |     |     |     |     |     |     |     |     |     |     |     |     |     |     |     |     |     |     |     |     |     |     |     |     |
|                                  |                          | JF912182/BeH422973/BRA/1984  | Human                                                                                                                 | K V A K V V V K N P A A A R M A G V N A P K S V P K I I A V I T N A T I V A V S R A F A R E R Q P I A S N T A R V T M | L I I H A N K T R K E T V R V D T P G A I N K I A I A R T V K A N I V S K K D I I H L                                 |                                                                                       |   |   |   |   |    |    |    |    |    |    |    |    |    |    |    |    |    |    |    |    |    |    |    |    |    |    |    |    |    |    |    |    |    |    |    |    |    |    |    |    |    |    |    |    |    |    |    |    |    |    |    |    |    |    |    |    |    |    |    |    |    |    |    |    |    |    |    |    |    |    |    |    |    |    |    |    |    |    |    |    |    |    |    |    |    |    |    |    |    |    |    |    |    |    |     |     |     |     |     |     |     |     |     |     |     |     |     |     |     |     |     |     |     |     |     |     |     |     |     |     |     |     |     |     |     |     |     |     |     |     |     |     |     |     |     |     |     |     |     |     |     |     |     |     |     |     |     |     |     |     |     |     |     |     |     |     |     |     |     |     |     |     |     |     |     |     |     |     |     |     |     |     |     |     |     |     |     |     |     |     |     |     |     |     |     |     |     |     |     |     |     |     |     |     |     |     |     |     |     |     |     |     |     |     |     |     |     |     |     |     |     |     |     |     |     |     |     |     |     |     |     |     |     |     |     |     |     |     |     |     |     |     |     |     |     |     |     |     |     |     |     |     |     |     |     |     |     |     |     |     |     |     |     |     |     |     |     |     |     |     |     |     |     |     |     |     |     |     |     |     |     |     |     |     |     |     |     |     |     |     |     |     |     |     |     |     |     |     |     |     |     |     |     |     |     |     |     |     |     |     |     |     |     |     |     |     |     |     |     |     |     |     |     |     |     |     |     |     |     |     |     |     |     |     |     |     |     |     |     |     |     |     |     |     |     |     |     |     |     |     |     |     |     |     |     |     |     |     |     |     |     |     |     |     |     |     |     |     |     |     |     |     |     |     |     |     |     |     |     |     |     |     |     |     |     |     |     |     |     |     |     |     |     |     |     |     |     |     |     |     |     |     |     |     |     |     |     |     |     |     |     |     |     |     |     |     |     |     |     |     |     |     |     |     |     |     |     |     |     |     |     |     |     |     |     |     |     |     |     |     |     |     |     |     |     |     |     |     |     |     |     |     |     |     |     |     |     |     |     |     |     |     |     |     |     |     |     |     |     |     |     |     |     |     |     |     |     |     |     |     |     |     |     |     |     |     |     |     |     |     |     |     |     |     |     |     |     |     |     |     |     |     |     |     |     |     |     |     |     |     |     |     |     |     |     |     |     |     |     |     |     |     |     |     |     |     |     |     |     |     |     |     |     |     |     |     |     |     |     |     |     |     |     |     |     |     |     |     |     |     |     |     |     |     |     |     |     |     |     |     |     |     |     |     |     |     |     |     |     |     |     |     |     |     |     |     |     |     |     |     |     |     |     |     |     |     |     |     |     |     |     |     |     |     |     |     |     |     |     |     |     |     |     |     |     |     |     |     |     |     |     |     |     |     |     |     |     |     |     |     |     |     |     |     |     |     |     |     |     |     |     |     |     |     |     |     |     |     |     |     |     |     |     |     |     |     |     |     |     |     |     |     |     |     |     |     |     |     |     |     |     |     |     |     |     |     |     |     |     |     |     |     |     |     |     |     |     |     |     |     |     |     |     |     |     |     |     |     |     |     |     |     |     |     |     |     |     |     |     |     |     |     |     |     |     |     |     |     |     |     |     |     |     |     |     |     |     |     |     |     |     |     |     |     |     |     |     |     |     |     |     |     |     |     |     |     |     |     |     |     |     |     |     |     |     |     |     |     |     |     |     |     |     |     |     |     |     |     |     |     |     |     |     |     |     |     |     |     |     |     |     |     |     |     |     |     |     |     |     |     |     |     |     |     |     |     |     |     |     |     |     |     |     |     |     |     |     |     |     |     |     |     |     |     |     |     |     |     |     |     |     |     |     |     |     |     |     |     |     |     |     |     |     |     |     |     |     |     |     |     |     |     |     |     |     |     |     |     |     |     |     |     |     |     |     |     |     |     |     |     |     |     |     |     |     |     |     |     |     |     |     |     |     |     |     |     |     |     |     |     |     |     |     |     |     |     |     |     |     |     |     |     |     |     |     |     |     |     |     |     |     |     |     |     |     |     |     |     |     |     |     |     |     |     |     |     |     |     |     |     |     |     |     |     |     |     |     |     |     |     |     |     |     |     |     |     |     |     |     |     |     |     |     |     |     |     |     |     |     |     |     |     |     |     |     |     |     |     |     |     |     |     |     |     |     |     |     |     |     |     |     |     |     |     |     |     |     |     |     |     |     |     |     |     |     |     |     |     |     |     |     |     |     |     |     |     |     |     |     |     |     |     |     |     |     |     |     |     |     |     |     |     |     |
|                                  |                          | JF912185/BeAR513008/BRA/1992 | Mosquito                                                                                                              | K V A K V V V K N P A T A R M A G V N A P K S V P R I V A V I T N A T I A A V S R A F A K E R Q P I A S N T A K V M M | L I T H A N K T R K E T V R V D T P G A I N K M A I A R T V K A N V I S K K D I M H F                                 |                                                                                       |   |   |   |   |    |    |    |    |    |    |    |    |    |    |    |    |    |    |    |    |    |    |    |    |    |    |    |    |    |    |    |    |    |    |    |    |    |    |    |    |    |    |    |    |    |    |    |    |    |    |    |    |    |    |    |    |    |    |    |    |    |    |    |    |    |    |    |    |    |    |    |    |    |    |    |    |    |    |    |    |    |    |    |    |    |    |    |    |    |    |    |    |    |    |     |     |     |     |     |     |     |     |     |     |     |     |     |     |     |     |     |     |     |     |     |     |     |     |     |     |     |     |     |     |     |     |     |     |     |     |     |     |     |     |     |     |     |     |     |     |     |     |     |     |     |     |     |     |     |     |     |     |     |     |     |     |     |     |     |     |     |     |     |     |     |     |     |     |     |     |     |     |     |     |     |     |     |     |     |     |     |     |     |     |     |     |     |     |     |     |     |     |     |     |     |     |     |     |     |     |     |     |     |     |     |     |     |     |     |     |     |     |     |     |     |     |     |     |     |     |     |     |     |     |     |     |     |     |     |     |     |     |     |     |     |     |     |     |     |     |     |     |     |     |     |     |     |     |     |     |     |     |     |     |     |     |     |     |     |     |     |     |     |     |     |     |     |     |     |     |     |     |     |     |     |     |     |     |     |     |     |     |     |     |     |     |     |     |     |     |     |     |     |     |     |     |     |     |     |     |     |     |     |     |     |     |     |     |     |     |     |     |     |     |     |     |     |     |     |     |     |     |     |     |     |     |     |     |     |     |     |     |     |     |     |     |     |     |     |     |     |     |     |     |     |     |     |     |     |     |     |     |     |     |     |     |     |     |     |     |     |     |     |     |     |     |     |     |     |     |     |     |     |     |     |     |     |     |     |     |     |     |     |     |     |     |     |     |     |     |     |     |     |     |     |     |     |     |     |     |     |     |     |     |     |     |     |     |     |     |     |     |     |     |     |     |     |     |     |     |     |     |     |     |     |     |     |     |     |     |     |     |     |     |     |     |     |     |     |     |     |     |     |     |     |     |     |     |     |     |     |     |     |     |     |     |     |     |     |     |     |     |     |     |     |     |     |     |     |     |     |     |     |     |     |     |     |     |     |     |     |     |     |     |     |     |     |     |     |     |     |     |     |     |     |     |     |     |     |     |     |     |     |     |     |     |     |     |     |     |     |     |     |     |     |     |     |     |     |     |     |     |     |     |     |     |     |     |     |     |     |     |     |     |     |     |     |     |     |     |     |     |     |     |     |     |     |     |     |     |     |     |     |     |     |     |     |     |     |     |     |     |     |     |     |     |     |     |     |     |     |     |     |     |     |     |     |     |     |     |     |     |     |     |     |     |     |     |     |     |     |     |     |     |     |     |     |     |     |     |     |     |     |     |     |     |     |     |     |     |     |     |     |     |     |     |     |     |     |     |     |     |     |     |     |     |     |     |     |     |     |     |     |     |     |     |     |     |     |     |     |     |     |     |     |     |     |     |     |     |     |     |     |     |     |     |     |     |     |     |     |     |     |     |     |     |     |     |     |     |     |     |     |     |     |     |     |     |     |     |     |     |     |     |     |     |     |     |     |     |     |     |     |     |     |     |     |     |     |     |     |     |     |     |     |     |     |     |     |     |     |     |     |     |     |     |     |     |     |     |     |     |     |     |     |     |     |     |     |     |     |     |     |     |     |     |     |     |     |     |     |     |     |     |     |     |     |     |     |     |     |     |     |     |     |     |     |     |     |     |     |     |     |     |     |     |     |     |     |     |     |     |     |     |     |     |     |     |     |     |     |     |     |     |     |     |     |     |     |     |     |     |     |     |     |     |     |     |     |     |     |     |     |     |     |     |     |     |     |     |     |     |     |     |     |     |     |     |     |     |     |     |     |     |     |     |     |     |     |     |     |     |     |     |     |     |     |     |     |     |     |     |     |     |     |     |     |     |     |     |     |     |     |     |     |     |     |     |     |     |     |     |     |     |     |     |     |     |     |     |     |     |     |     |     |     |     |     |     |     |     |     |     |     |     |     |     |     |     |     |     |     |     |     |     |     |     |     |     |     |     |     |     |     |     |     |     |     |     |     |     |     |     |     |     |     |     |     |     |     |     |     |     |     |     |     |     |     |     |     |     |     |     |     |     |     |     |     |     |     |     |     |     |     |     |     |     |     |     |     |     |     |     |     |     |     |     |     |     |     |     |     |     |     |     |     |     |     |     |     |     |     |     |     |     |     |     |     |     |     |     |     |     |     |     |     |     |     |     |     |     |     |     |
|                                  | 1C                       | JF912179/BeAR378600/BRA/1980 | Mosquito                                                                                                              | K V A K A V V R N P A T A K M A S V S A P K S V P K I I A V I T N A M I V A I S K A L A K E R Q P I A S N T A R V T M | F I I H A N N T K K E T I R V D T P G T I N K I A I A R T V R A N I V S K R D I M H L                                 |                                                                                       |   |   |   |   |    |    |    |    |    |    |    |    |    |    |    |    |    |    |    |    |    |    |    |    |    |    |    |    |    |    |    |    |    |    |    |    |    |    |    |    |    |    |    |    |    |    |    |    |    |    |    |    |    |    |    |    |    |    |    |    |    |    |    |    |    |    |    |    |    |    |    |    |    |    |    |    |    |    |    |    |    |    |    |    |    |    |    |    |    |    |    |    |    |    |     |     |     |     |     |     |     |     |     |     |     |     |     |     |     |     |     |     |     |     |     |     |     |     |     |     |     |     |     |     |     |     |     |     |     |     |     |     |     |     |     |     |     |     |     |     |     |     |     |     |     |     |     |     |     |     |     |     |     |     |     |     |     |     |     |     |     |     |     |     |     |     |     |     |     |     |     |     |     |     |     |     |     |     |     |     |     |     |     |     |     |     |     |     |     |     |     |     |     |     |     |     |     |     |     |     |     |     |     |     |     |     |     |     |     |     |     |     |     |     |     |     |     |     |     |     |     |     |     |     |     |     |     |     |     |     |     |     |     |     |     |     |     |     |     |     |     |     |     |     |     |     |     |     |     |     |     |     |     |     |     |     |     |     |     |     |     |     |     |     |     |     |     |     |     |     |     |     |     |     |     |     |     |     |     |     |     |     |     |     |     |     |     |     |     |     |     |     |     |     |     |     |     |     |     |     |     |     |     |     |     |     |     |     |     |     |     |     |     |     |     |     |     |     |     |     |     |     |     |     |     |     |     |     |     |     |     |     |     |     |     |     |     |     |     |     |     |     |     |     |     |     |     |     |     |     |     |     |     |     |     |     |     |     |     |     |     |     |     |     |     |     |     |     |     |     |     |     |     |     |     |     |     |     |     |     |     |     |     |     |     |     |     |     |     |     |     |     |     |     |     |     |     |     |     |     |     |     |     |     |     |     |     |     |     |     |     |     |     |     |     |     |     |     |     |     |     |     |     |     |     |     |     |     |     |     |     |     |     |     |     |     |     |     |     |     |     |     |     |     |     |     |     |     |     |     |     |     |     |     |     |     |     |     |     |     |     |     |     |     |     |     |     |     |     |     |     |     |     |     |     |     |     |     |     |     |     |     |     |     |     |     |     |     |     |     |     |     |     |     |     |     |     |     |     |     |     |     |     |     |     |     |     |     |     |     |     |     |     |     |     |     |     |     |     |     |     |     |     |     |     |     |     |     |     |     |     |     |     |     |     |     |     |     |     |     |     |     |     |     |     |     |     |     |     |     |     |     |     |     |     |     |     |     |     |     |     |     |     |     |     |     |     |     |     |     |     |     |     |     |     |     |     |     |     |     |     |     |     |     |     |     |     |     |     |     |     |     |     |     |     |     |     |     |     |     |     |     |     |     |     |     |     |     |     |     |     |     |     |     |     |     |     |     |     |     |     |     |     |     |     |     |     |     |     |     |     |     |     |     |     |     |     |     |     |     |     |     |     |     |     |     |     |     |     |     |     |     |     |     |     |     |     |     |     |     |     |     |     |     |     |     |     |     |     |     |     |     |     |     |     |     |     |     |     |     |     |     |     |     |     |     |     |     |     |     |     |     |     |     |     |     |     |     |     |     |     |     |     |     |     |     |     |     |     |     |     |     |     |     |     |     |     |     |     |     |     |     |     |     |     |     |     |     |     |     |     |     |     |     |     |     |     |     |     |     |     |     |     |     |     |     |     |     |     |     |     |     |     |     |     |     |     |     |     |     |     |     |     |     |     |     |     |     |     |     |     |     |     |     |     |     |     |     |     |     |     |     |     |     |     |     |     |     |     |     |     |     |     |     |     |     |     |     |     |     |     |     |     |     |     |     |     |     |     |     |     |     |     |     |     |     |     |     |     |     |     |     |     |     |     |     |     |     |     |     |     |     |     |     |     |     |     |     |     |     |     |     |     |     |     |     |     |     |     |     |     |     |     |     |     |     |     |     |     |     |     |     |     |     |     |     |     |     |     |     |     |     |     |     |     |     |     |     |     |     |     |     |     |     |     |     |     |     |     |     |     |     |     |     |     |     |     |     |     |     |     |     |     |     |     |     |     |     |     |     |     |     |     |     |     |     |     |     |     |     |     |     |     |     |     |     |     |     |     |     |     |     |     |     |     |     |     |     |     |     |     |     |     |     |     |     |     |     |     |     |     |     |     |     |     |     |     |     |     |     |     |     |     |     |     |     |     |     |     |     |     |     |     |     |     |     |     |     |     |     |     |     |     |     |     |     |     |     |     |     |     |     |     |
|                                  |                          | JF912183/BeH423602/BRA/1984  | Human                                                                                                                 | K V A K V V V R N P A T A K M A G V S A P K S V P K I I A V I T N A M I V A I S K A L A K E R Q P I A S N T A R V T M | F I I H A N N T R K E T I R V D T P G T I N R I A I A R T V K A N I V S K R D I M H L                                 |                                                                                       |   |   |   |   |    |    |    |    |    |    |    |    |    |    |    |    |    |    |    |    |    |    |    |    |    |    |    |    |    |    |    |    |    |    |    |    |    |    |    |    |    |    |    |    |    |    |    |    |    |    |    |    |    |    |    |    |    |    |    |    |    |    |    |    |    |    |    |    |    |    |    |    |    |    |    |    |    |    |    |    |    |    |    |    |    |    |    |    |    |    |    |    |    |    |     |     |     |     |     |     |     |     |     |     |     |     |     |     |     |     |     |     |     |     |     |     |     |     |     |     |     |     |     |     |     |     |     |     |     |     |     |     |     |     |     |     |     |     |     |     |     |     |     |     |     |     |     |     |     |     |     |     |     |     |     |     |     |     |     |     |     |     |     |     |     |     |     |     |     |     |     |     |     |     |     |     |     |     |     |     |     |     |     |     |     |     |     |     |     |     |     |     |     |     |     |     |     |     |     |     |     |     |     |     |     |     |     |     |     |     |     |     |     |     |     |     |     |     |     |     |     |     |     |     |     |     |     |     |     |     |     |     |     |     |     |     |     |     |     |     |     |     |     |     |     |     |     |     |     |     |     |     |     |     |     |     |     |     |     |     |     |     |     |     |     |     |     |     |     |     |     |     |     |     |     |     |     |     |     |     |     |     |     |     |     |     |     |     |     |     |     |     |     |     |     |     |     |     |     |     |     |     |     |     |     |     |     |     |     |     |     |     |     |     |     |     |     |     |     |     |     |     |     |     |     |     |     |     |     |     |     |     |     |     |     |     |     |     |     |     |     |     |     |     |     |     |     |     |     |     |     |     |     |     |     |     |     |     |     |     |     |     |     |     |     |     |     |     |     |     |     |     |     |     |     |     |     |     |     |     |     |     |     |     |     |     |     |     |     |     |     |     |     |     |     |     |     |     |     |     |     |     |     |     |     |     |     |     |     |     |     |     |     |     |     |     |     |     |     |     |     |     |     |     |     |     |     |     |     |     |     |     |     |     |     |     |     |     |     |     |     |     |     |     |     |     |     |     |     |     |     |     |     |     |     |     |     |     |     |     |     |     |     |     |     |     |     |     |     |     |     |     |     |     |     |     |     |     |     |     |     |     |     |     |     |     |     |     |     |     |     |     |     |     |     |     |     |     |     |     |     |     |     |     |     |     |     |     |     |     |     |     |     |     |     |     |     |     |     |     |     |     |     |     |     |     |     |     |     |     |     |     |     |     |     |     |     |     |     |     |     |     |     |     |     |     |     |     |     |     |     |     |     |     |     |     |     |     |     |     |     |     |     |     |     |     |     |     |     |     |     |     |     |     |     |     |     |     |     |     |     |     |     |     |     |     |     |     |     |     |     |     |     |     |     |     |     |     |     |     |     |     |     |     |     |     |     |     |     |     |     |     |     |     |     |     |     |     |     |     |     |     |     |     |     |     |     |     |     |     |     |     |     |     |     |     |     |     |     |     |     |     |     |     |     |     |     |     |     |     |     |     |     |     |     |     |     |     |     |     |     |     |     |     |     |     |     |     |     |     |     |     |     |     |     |     |     |     |     |     |     |     |     |     |     |     |     |     |     |     |     |     |     |     |     |     |     |     |     |     |     |     |     |     |     |     |     |     |     |     |     |     |     |     |     |     |     |     |     |     |     |     |     |     |     |     |     |     |     |     |     |     |     |     |     |     |     |     |     |     |     |     |     |     |     |     |     |     |     |     |     |     |     |     |     |     |     |     |     |     |     |     |     |     |     |     |     |     |     |     |     |     |     |     |     |     |     |     |     |     |     |     |     |     |     |     |     |     |     |     |     |     |     |     |     |     |     |     |     |     |     |     |     |     |     |     |     |     |     |     |     |     |     |     |     |     |     |     |     |     |     |     |     |     |     |     |     |     |     |     |     |     |     |     |     |     |     |     |     |     |     |     |     |     |     |     |     |     |     |     |     |     |     |     |     |     |     |     |     |     |     |     |     |     |     |     |     |     |     |     |     |     |     |     |     |     |     |     |     |     |     |     |     |     |     |     |     |     |     |     |     |     |     |     |     |     |     |     |     |     |     |     |     |     |     |     |     |     |     |     |     |     |     |     |     |     |     |     |     |     |     |     |     |     |     |     |     |     |     |     |     |     |     |     |     |     |     |     |     |     |     |     |     |     |     |     |     |     |     |     |     |     |     |     |     |     |     |     |     |     |     |     |     |     |     |     |     |     |     |     |     |     |     |     |     |     |     |     |     |     |     |     |     |     |     |     |     |     |     |     |     |     |     |
|                                  |                          | JF912184/BeH463676/BRA/1987  | Human                                                                                                                 | K V A K A V V R N P A T A K R A G V S A S K S V P K I I A V I T N A M I V A I S K T L A K E R Q P I A S N T A R V T M | F I I H A N N T K K E T I R V D T P G T I N K I A I A R T V R A N I V S K R D I M H L                                 |                                                                                       |   |   |   |   |    |    |    |    |    |    |    |    |    |    |    |    |    |    |    |    |    |    |    |    |    |    |    |    |    |    |    |    |    |    |    |    |    |    |    |    |    |    |    |    |    |    |    |    |    |    |    |    |    |    |    |    |    |    |    |    |    |    |    |    |    |    |    |    |    |    |    |    |    |    |    |    |    |    |    |    |    |    |    |    |    |    |    |    |    |    |    |    |    |    |     |     |     |     |     |     |     |     |     |     |     |     |     |     |     |     |     |     |     |     |     |     |     |     |     |     |     |     |     |     |     |     |     |     |     |     |     |     |     |     |     |     |     |     |     |     |     |     |     |     |     |     |     |     |     |     |     |     |     |     |     |     |     |     |     |     |     |     |     |     |     |     |     |     |     |     |     |     |     |     |     |     |     |     |     |     |     |     |     |     |     |     |     |     |     |     |     |     |     |     |     |     |     |     |     |     |     |     |     |     |     |     |     |     |     |     |     |     |     |     |     |     |     |     |     |     |     |     |     |     |     |     |     |     |     |     |     |     |     |     |     |     |     |     |     |     |     |     |     |     |     |     |     |     |     |     |     |     |     |     |     |     |     |     |     |     |     |     |     |     |     |     |     |     |     |     |     |     |     |     |     |     |     |     |     |     |     |     |     |     |     |     |     |     |     |     |     |     |     |     |     |     |     |     |     |     |     |     |     |     |     |     |     |     |     |     |     |     |     |     |     |     |     |     |     |     |     |     |     |     |     |     |     |     |     |     |     |     |     |     |     |     |     |     |     |     |     |     |     |     |     |     |     |     |     |     |     |     |     |     |     |     |     |     |     |     |     |     |     |     |     |     |     |     |     |     |     |     |     |     |     |     |     |     |     |     |     |     |     |     |     |     |     |     |     |     |     |     |     |     |     |     |     |     |     |     |     |     |     |     |     |     |     |     |     |     |     |     |     |     |     |     |     |     |     |     |     |     |     |     |     |     |     |     |     |     |     |     |     |     |     |     |     |     |     |     |     |     |     |     |     |     |     |     |     |     |     |     |     |     |     |     |     |     |     |     |     |     |     |     |     |     |     |     |     |     |     |     |     |     |     |     |     |     |     |     |     |     |     |     |     |     |     |     |     |     |     |     |     |     |     |     |     |     |     |     |     |     |     |     |     |     |     |     |     |     |     |     |     |     |     |     |     |     |     |     |     |     |     |     |     |     |     |     |     |     |     |     |     |     |     |     |     |     |     |     |     |     |     |     |     |     |     |     |     |     |     |     |     |     |     |     |     |     |     |     |     |     |     |     |     |     |     |     |     |     |     |     |     |     |     |     |     |     |     |     |     |     |     |     |     |     |     |     |     |     |     |     |     |     |     |     |     |     |     |     |     |     |     |     |     |     |     |     |     |     |     |     |     |     |     |     |     |     |     |     |     |     |     |     |     |     |     |     |     |     |     |     |     |     |     |     |     |     |     |     |     |     |     |     |     |     |     |     |     |     |     |     |     |     |     |     |     |     |     |     |     |     |     |     |     |     |     |     |     |     |     |     |     |     |     |     |     |     |     |     |     |     |     |     |     |     |     |     |     |     |     |     |     |     |     |     |     |     |     |     |     |     |     |     |     |     |     |     |     |     |     |     |     |     |     |     |     |     |     |     |     |     |     |     |     |     |     |     |     |     |     |     |     |     |     |     |     |     |     |     |     |     |     |     |     |     |     |     |     |     |     |     |     |     |     |     |     |     |     |     |     |     |     |     |     |     |     |     |     |     |     |     |     |     |     |     |     |     |     |     |     |     |     |     |     |     |     |     |     |     |     |     |     |     |     |     |     |     |     |     |     |     |     |     |     |     |     |     |     |     |     |     |     |     |     |     |     |     |     |     |     |     |     |     |     |     |     |     |     |     |     |     |     |     |     |     |     |     |     |     |     |     |     |     |     |     |     |     |     |     |     |     |     |     |     |     |     |     |     |     |     |     |     |     |     |     |     |     |     |     |     |     |     |     |     |     |     |     |     |     |     |     |     |     |     |     |     |     |     |     |     |     |     |     |     |     |     |     |     |     |     |     |     |     |     |     |     |     |     |     |     |     |     |     |     |     |     |     |     |     |     |     |     |     |     |     |     |     |     |     |     |     |     |     |     |     |     |     |     |     |     |     |     |     |     |     |     |     |     |     |     |     |     |     |     |     |     |     |     |     |     |     |     |     |     |     |     |     |     |     |     |     |     |     |     |     |     |     |     |     |     |     |     |     |     |     |     |     |     |     |     |     |     |
|                                  |                          | JF912186/BeH526722/BRA/1994  | Human                                                                                                                 | R V A K V V V R S P A T A K M A G V S A P K S V P K I I T V I T S A M I V V I S K A L A K E R Q P I A S N T A R A T M | F I I H A N K T K K E T I R V D T P G T I N K I A I A R T V K A N I V S K R D V M H L                                 |                                                                                       |   |   |   |   |    |    |    |    |    |    |    |    |    |    |    |    |    |    |    |    |    |    |    |    |    |    |    |    |    |    |    |    |    |    |    |    |    |    |    |    |    |    |    |    |    |    |    |    |    |    |    |    |    |    |    |    |    |    |    |    |    |    |    |    |    |    |    |    |    |    |    |    |    |    |    |    |    |    |    |    |    |    |    |    |    |    |    |    |    |    |    |    |    |    |     |     |     |     |     |     |     |     |     |     |     |     |     |     |     |     |     |     |     |     |     |     |     |     |     |     |     |     |     |     |     |     |     |     |     |     |     |     |     |     |     |     |     |     |     |     |     |     |     |     |     |     |     |     |     |     |     |     |     |     |     |     |     |     |     |     |     |     |     |     |     |     |     |     |     |     |     |     |     |     |     |     |     |     |     |     |     |     |     |     |     |     |     |     |     |     |     |     |     |     |     |     |     |     |     |     |     |     |     |     |     |     |     |     |     |     |     |     |     |     |     |     |     |     |     |     |     |     |     |     |     |     |     |     |     |     |     |     |     |     |     |     |     |     |     |     |     |     |     |     |     |     |     |     |     |     |     |     |     |     |     |     |     |     |     |     |     |     |     |     |     |     |     |     |     |     |     |     |     |     |     |     |     |     |     |     |     |     |     |     |     |     |     |     |     |     |     |     |     |     |     |     |     |     |     |     |     |     |     |     |     |     |     |     |     |     |     |     |     |     |     |     |     |     |     |     |     |     |     |     |     |     |     |     |     |     |     |     |     |     |     |     |     |     |     |     |     |     |     |     |     |     |     |     |     |     |     |     |     |     |     |     |     |     |     |     |     |     |     |     |     |     |     |     |     |     |     |     |     |     |     |     |     |     |     |     |     |     |     |     |     |     |     |     |     |     |     |     |     |     |     |     |     |     |     |     |     |     |     |     |     |     |     |     |     |     |     |     |     |     |     |     |     |     |     |     |     |     |     |     |     |     |     |     |     |     |     |     |     |     |     |     |     |     |     |     |     |     |     |     |     |     |     |     |     |     |     |     |     |     |     |     |     |     |     |     |     |     |     |     |     |     |     |     |     |     |     |     |     |     |     |     |     |     |     |     |     |     |     |     |     |     |     |     |     |     |     |     |     |     |     |     |     |     |     |     |     |     |     |     |     |     |     |     |     |     |     |     |     |     |     |     |     |     |     |     |     |     |     |     |     |     |     |     |     |     |     |     |     |     |     |     |     |     |     |     |     |     |     |     |     |     |     |     |     |     |     |     |     |     |     |     |     |     |     |     |     |     |     |     |     |     |     |     |     |     |     |     |     |     |     |     |     |     |     |     |     |     |     |     |     |     |     |     |     |     |     |     |     |     |     |     |     |     |     |     |     |     |     |     |     |     |     |     |     |     |     |     |     |     |     |     |     |     |     |     |     |     |     |     |     |     |     |     |     |     |     |     |     |     |     |     |     |     |     |     |     |     |     |     |     |     |     |     |     |     |     |     |     |     |     |     |     |     |     |     |     |     |     |     |     |     |     |     |     |     |     |     |     |     |     |     |     |     |     |     |     |     |     |     |     |     |     |     |     |     |     |     |     |     |     |     |     |     |     |     |     |     |     |     |     |     |     |     |     |     |     |     |     |     |     |     |     |     |     |     |     |     |     |     |     |     |     |     |     |     |     |     |     |     |     |     |     |     |     |     |     |     |     |     |     |     |     |     |     |     |     |     |     |     |     |     |     |     |     |     |     |     |     |     |     |     |     |     |     |     |     |     |     |     |     |     |     |     |     |     |     |     |     |     |     |     |     |     |     |     |     |     |     |     |     |     |     |     |     |     |     |     |     |     |     |     |     |     |     |     |     |     |     |     |     |     |     |     |     |     |     |     |     |     |     |     |     |     |     |     |     |     |     |     |     |     |     |     |     |     |     |     |     |     |     |     |     |     |     |     |     |     |     |     |     |     |     |     |     |     |     |     |     |     |     |     |     |     |     |     |     |     |     |     |     |     |     |     |     |     |     |     |     |     |     |     |     |     |     |     |     |     |     |     |     |     |     |     |     |     |     |     |     |     |     |     |     |     |     |     |     |     |     |     |     |     |     |     |     |     |     |     |     |     |     |     |     |     |     |     |     |     |     |     |     |     |     |     |     |     |     |     |     |     |     |     |     |     |     |     |     |     |     |     |     |     |     |     |     |     |     |     |     |     |     |     |     |     |     |     |     |     |     |     |     |     |     |     |     |     |     |     |     |     |     |     |     |     |     |     |     |     |     |
|                                  | Modern lineage           | 1D                           | JF912188/BeH622493/BRA/2000                                                                                           | Human                                                                                                                 | K V A K V V V R N P A T A R M A G V N A P K S V S K I V A V I T N A M I V A V S R A F A K E R Q P I A S N T A R V T M | L I I H A N K T R K E T V R V D T P G A I D K I A I A R T V K A N I V S R K D I M H L |   |   |   |   |    |    |    |    |    |    |    |    |    |    |    |    |    |    |    |    |    |    |    |    |    |    |    |    |    |    |    |    |    |    |    |    |    |    |    |    |    |    |    |    |    |    |    |    |    |    |    |    |    |    |    |    |    |    |    |    |    |    |    |    |    |    |    |    |    |    |    |    |    |    |    |    |    |    |    |    |    |    |    |    |    |    |    |    |    |    |    |    |    |    |     |     |     |     |     |     |     |     |     |     |     |     |     |     |     |     |     |     |     |     |     |     |     |     |     |     |     |     |     |     |     |     |     |     |     |     |     |     |     |     |     |     |     |     |     |     |     |     |     |     |     |     |     |     |     |     |     |     |     |     |     |     |     |     |     |     |     |     |     |     |     |     |     |     |     |     |     |     |     |     |     |     |     |     |     |     |     |     |     |     |     |     |     |     |     |     |     |     |     |     |     |     |     |     |     |     |     |     |     |     |     |     |     |     |     |     |     |     |     |     |     |     |     |     |     |     |     |     |     |     |     |     |     |     |     |     |     |     |     |     |     |     |     |     |     |     |     |     |     |     |     |     |     |     |     |     |     |     |     |     |     |     |     |     |     |     |     |     |     |     |     |     |     |     |     |     |     |     |     |     |     |     |     |     |     |     |     |     |     |     |     |     |     |     |     |     |     |     |     |     |     |     |     |     |     |     |     |     |     |     |     |     |     |     |     |     |     |     |     |     |     |     |     |     |     |     |     |     |     |     |     |     |     |     |     |     |     |     |     |     |     |     |     |     |     |     |     |     |     |     |     |     |     |     |     |     |     |     |     |     |     |     |     |     |     |     |     |     |     |     |     |     |     |     |     |     |     |     |     |     |     |     |     |     |     |     |     |     |     |     |     |     |     |     |     |     |     |     |     |     |     |     |     |     |     |     |     |     |     |     |     |     |     |     |     |     |     |     |     |     |     |     |     |     |     |     |     |     |     |     |     |     |     |     |     |     |     |     |     |     |     |     |     |     |     |     |     |     |     |     |     |     |     |     |     |     |     |     |     |     |     |     |     |     |     |     |     |     |     |     |     |     |     |     |     |     |     |     |     |     |     |     |     |     |     |     |     |     |     |     |     |     |     |     |     |     |     |     |     |     |     |     |     |     |     |     |     |     |     |     |     |     |     |     |     |     |     |     |     |     |     |     |     |     |     |     |     |     |     |     |     |     |     |     |     |     |     |     |     |     |     |     |     |     |     |     |     |     |     |     |     |     |     |     |     |     |     |     |     |     |     |     |     |     |     |     |     |     |     |     |     |     |     |     |     |     |     |     |     |     |     |     |     |     |     |     |     |     |     |     |     |     |     |     |     |     |     |     |     |     |     |     |     |     |     |     |     |     |     |     |     |     |     |     |     |     |     |     |     |     |     |     |     |     |     |     |     |     |     |     |     |     |     |     |     |     |     |     |     |     |     |     |     |     |     |     |     |     |     |     |     |     |     |     |     |     |     |     |     |     |     |     |     |     |     |     |     |     |     |     |     |     |     |     |     |     |     |     |     |     |     |     |     |     |     |     |     |     |     |     |     |     |     |     |     |     |     |     |     |     |     |     |     |     |     |     |     |     |     |     |     |     |     |     |     |     |     |     |     |     |     |     |     |     |     |     |     |     |     |     |     |     |     |     |     |     |     |     |     |     |     |     |     |     |     |     |     |     |     |     |     |     |     |     |     |     |     |     |     |     |     |     |     |     |     |     |     |     |     |     |     |     |     |     |     |     |     |     |     |     |     |     |     |     |     |     |     |     |     |     |     |     |     |     |     |     |     |     |     |     |     |     |     |     |     |     |     |     |     |     |     |     |     |     |     |     |     |     |     |     |     |     |     |     |     |     |     |     |     |     |     |     |     |     |     |     |     |     |     |     |     |     |     |     |     |     |     |     |     |     |     |     |     |     |     |     |     |     |     |     |     |     |     |     |     |     |     |     |     |     |     |     |     |     |     |     |     |     |     |     |     |     |     |     |     |     |     |     |     |     |     |     |     |     |     |     |     |     |     |     |     |     |     |     |     |     |     |     |     |     |     |     |     |     |     |     |     |     |     |     |     |     |     |     |     |     |     |     |     |     |     |     |     |     |     |     |     |     |     |     |     |     |     |     |     |     |     |     |     |     |     |     |     |     |     |     |     |     |     |     |     |     |     |     |     |     |     |     |     |     |     |     |     |     |     |     |     |     |     |     |     |     |     |     |     |     |     |     |     |     |     |     |     |     |     |     |     |     |     |
|                                  |                          |                              | JF912187/BeH622205/BRA/2000                                                                                           | Human                                                                                                                 | K V A K V V V R N S A T A R M A G V N A P K S V S K I V A V I T N A M I V A V S R A F A K E R Q P I T S N T A R V T M | L I I H A N K T R K E T V R V D T P G A I D K I A I A R T V K A N I V S R K D I M H L |   |   |   |   |    |    |    |    |    |    |    |    |    |    |    |    |    |    |    |    |    |    |    |    |    |    |    |    |    |    |    |    |    |    |    |    |    |    |    |    |    |    |    |    |    |    |    |    |    |    |    |    |    |    |    |    |    |    |    |    |    |    |    |    |    |    |    |    |    |    |    |    |    |    |    |    |    |    |    |    |    |    |    |    |    |    |    |    |    |    |    |    |    |    |     |     |     |     |     |     |     |     |     |     |     |     |     |     |     |     |     |     |     |     |     |     |     |     |     |     |     |     |     |     |     |     |     |     |     |     |     |     |     |     |     |     |     |     |     |     |     |     |     |     |     |     |     |     |     |     |     |     |     |     |     |     |     |     |     |     |     |     |     |     |     |     |     |     |     |     |     |     |     |     |     |     |     |     |     |     |     |     |     |     |     |     |     |     |     |     |     |     |     |     |     |     |     |     |     |     |     |     |     |     |     |     |     |     |     |     |     |     |     |     |     |     |     |     |     |     |     |     |     |     |     |     |     |     |     |     |     |     |     |     |     |     |     |     |     |     |     |     |     |     |     |     |     |     |     |     |     |     |     |     |     |     |     |     |     |     |     |     |     |     |     |     |     |     |     |     |     |     |     |     |     |     |     |     |     |     |     |     |     |     |     |     |     |     |     |     |     |     |     |     |     |     |     |     |     |     |     |     |     |     |     |     |     |     |     |     |     |     |     |     |     |     |     |     |     |     |     |     |     |     |     |     |     |     |     |     |     |     |     |     |     |     |     |     |     |     |     |     |     |     |     |     |     |     |     |     |     |     |     |     |     |     |     |     |     |     |     |     |     |     |     |     |     |     |     |     |     |     |     |     |     |     |     |     |     |     |     |     |     |     |     |     |     |     |     |     |     |     |     |     |     |     |     |     |     |     |     |     |     |     |     |     |     |     |     |     |     |     |     |     |     |     |     |     |     |     |     |     |     |     |     |     |     |     |     |     |     |     |     |     |     |     |     |     |     |     |     |     |     |     |     |     |     |     |     |     |     |     |     |     |     |     |     |     |     |     |     |     |     |     |     |     |     |     |     |     |     |     |     |     |     |     |     |     |     |     |     |     |     |     |     |     |     |     |     |     |     |     |     |     |     |     |     |     |     |     |     |     |     |     |     |     |     |     |     |     |     |     |     |     |     |     |     |     |     |     |     |     |     |     |     |     |     |     |     |     |     |     |     |     |     |     |     |     |     |     |     |     |     |     |     |     |     |     |     |     |     |     |     |     |     |     |     |     |     |     |     |     |     |     |     |     |     |     |     |     |     |     |     |     |     |     |     |     |     |     |     |     |     |     |     |     |     |     |     |     |     |     |     |     |     |     |     |     |     |     |     |     |     |     |     |     |     |     |     |     |     |     |     |     |     |     |     |     |     |     |     |     |     |     |     |     |     |     |     |     |     |     |     |     |     |     |     |     |     |     |     |     |     |     |     |     |     |     |     |     |     |     |     |     |     |     |     |     |     |     |     |     |     |     |     |     |     |     |     |     |     |     |     |     |     |     |     |     |     |     |     |     |     |     |     |     |     |     |     |     |     |     |     |     |     |     |     |     |     |     |     |     |     |     |     |     |     |     |     |     |     |     |     |     |     |     |     |     |     |     |     |     |     |     |     |     |     |     |     |     |     |     |     |     |     |     |     |     |     |     |     |     |     |     |     |     |     |     |     |     |     |     |     |     |     |     |     |     |     |     |     |     |     |     |     |     |     |     |     |     |     |     |     |     |     |     |     |     |     |     |     |     |     |     |     |     |     |     |     |     |     |     |     |     |     |     |     |     |     |     |     |     |     |     |     |     |     |     |     |     |     |     |     |     |     |     |     |     |     |     |     |     |     |     |     |     |     |     |     |     |     |     |     |     |     |     |     |     |     |     |     |     |     |     |     |     |     |     |     |     |     |     |     |     |     |     |     |     |     |     |     |     |     |     |     |     |     |     |     |     |     |     |     |     |     |     |     |     |     |     |     |     |     |     |     |     |     |     |     |     |     |     |     |     |     |     |     |     |     |     |     |     |     |     |     |     |     |     |     |     |     |     |     |     |     |     |     |     |     |     |     |     |     |     |     |     |     |     |     |     |     |     |     |     |     |     |     |     |     |     |     |     |     |     |     |     |     |     |     |     |     |     |     |     |     |     |     |     |     |     |     |     |     |     |     |     |     |     |     |     |     |     |     |     |     |     |     |     |     |     |     |     |     |     |     |     |     |     |     |     |     |     |     |
|                                  |                          | JF912189/BeAR646536/BRA/2001 | Mosquito                                                                                                              | K V A K V V V R N P A T V R M A G V N A P K S V S K I V A V I T N A M I V A V S R A F A K E R Q S I A S N T A R V T M | L I I H A N K T R K E T V P V V I P G A I D K I A I A R T V K A N I V S R K D I M H L                                 |                                                                                       |   |   |   |   |    |    |    |    |    |    |    |    |    |    |    |    |    |    |    |    |    |    |    |    |    |    |    |    |    |    |    |    |    |    |    |    |    |    |    |    |    |    |    |    |    |    |    |    |    |    |    |    |    |    |    |    |    |    |    |    |    |    |    |    |    |    |    |    |    |    |    |    |    |    |    |    |    |    |    |    |    |    |    |    |    |    |    |    |    |    |    |    |    |    |     |     |     |     |     |     |     |     |     |     |     |     |     |     |     |     |     |     |     |     |     |     |     |     |     |     |     |     |     |     |     |     |     |     |     |     |     |     |     |     |     |     |     |     |     |     |     |     |     |     |     |     |     |     |     |     |     |     |     |     |     |     |     |     |     |     |     |     |     |     |     |     |     |     |     |     |     |     |     |     |     |     |     |     |     |     |     |     |     |     |     |     |     |     |     |     |     |     |     |     |     |     |     |     |     |     |     |     |     |     |     |     |     |     |     |     |     |     |     |     |     |     |     |     |     |     |     |     |     |     |     |     |     |     |     |     |     |     |     |     |     |     |     |     |     |     |     |     |     |     |     |     |     |     |     |     |     |     |     |     |     |     |     |     |     |     |     |     |     |     |     |     |     |     |     |     |     |     |     |     |     |     |     |     |     |     |     |     |     |     |     |     |     |     |     |     |     |     |     |     |     |     |     |     |     |     |     |     |     |     |     |     |     |     |     |     |     |     |     |     |     |     |     |     |     |     |     |     |     |     |     |     |     |     |     |     |     |     |     |     |     |     |     |     |     |     |     |     |     |     |     |     |     |     |     |     |     |     |     |     |     |     |     |     |     |     |     |     |     |     |     |     |     |     |     |     |     |     |     |     |     |     |     |     |     |     |     |     |     |     |     |     |     |     |     |     |     |     |     |     |     |     |     |     |     |     |     |     |     |     |     |     |     |     |     |     |     |     |     |     |     |     |     |     |     |     |     |     |     |     |     |     |     |     |     |     |     |     |     |     |     |     |     |     |     |     |     |     |     |     |     |     |     |     |     |     |     |     |     |     |     |     |     |     |     |     |     |     |     |     |     |     |     |     |     |     |     |     |     |     |     |     |     |     |     |     |     |     |     |     |     |     |     |     |     |     |     |     |     |     |     |     |     |     |     |     |     |     |     |     |     |     |     |     |     |     |     |     |     |     |     |     |     |     |     |     |     |     |     |     |     |     |     |     |     |     |     |     |     |     |     |     |     |     |     |     |     |     |     |     |     |     |     |     |     |     |     |     |     |     |     |     |     |     |     |     |     |     |     |     |     |     |     |     |     |     |     |     |     |     |     |     |     |     |     |     |     |     |     |     |     |     |     |     |     |     |     |     |     |     |     |     |     |     |     |     |     |     |     |     |     |     |     |     |     |     |     |     |     |     |     |     |     |     |     |     |     |     |     |     |     |     |     |     |     |     |     |     |     |     |     |     |     |     |     |     |     |     |     |     |     |     |     |     |     |     |     |     |     |     |     |     |     |     |     |     |     |     |     |     |     |     |     |     |     |     |     |     |     |     |     |     |     |     |     |     |     |     |     |     |     |     |     |     |     |     |     |     |     |     |     |     |     |     |     |     |     |     |     |     |     |     |     |     |     |     |     |     |     |     |     |     |     |     |     |     |     |     |     |     |     |     |     |     |     |     |     |     |     |     |     |     |     |     |     |     |     |     |     |     |     |     |     |     |     |     |     |     |     |     |     |     |     |     |     |     |     |     |     |     |     |     |     |     |     |     |     |     |     |     |     |     |     |     |     |     |     |     |     |     |     |     |     |     |     |     |     |     |     |     |     |     |     |     |     |     |     |     |     |     |     |     |     |     |     |     |     |     |     |     |     |     |     |     |     |     |     |     |     |     |     |     |     |     |     |     |     |     |     |     |     |     |     |     |     |     |     |     |     |     |     |     |     |     |     |     |     |     |     |     |     |     |     |     |     |     |     |     |     |     |     |     |     |     |     |     |     |     |     |     |     |     |     |     |     |     |     |     |     |     |     |     |     |     |     |     |     |     |     |     |     |     |     |     |     |     |     |     |     |     |     |     |     |     |     |     |     |     |     |     |     |     |     |     |     |     |     |     |     |     |     |     |     |     |     |     |     |     |     |     |     |     |     |     |     |     |     |     |     |     |     |     |     |     |     |     |     |     |     |     |     |     |     |     |     |     |     |     |     |     |     |     |     |     |     |     |     |     |     |     |     |     |     |     |     |     |     |     |     |     |     |     |     |     |     |     |     |     |     |
| JF912190/BeH655417/BRA/2002      |                          | Human                        | K V V R V V V R N P A T A R M A G V N A P K S V P K V I A V V T N A M I V A V S R A F A K E R Q P I A N N T A R V T M | L I I H A N K T R K E T V R V D T P G T I N K I A I A R T V K A N I V S K K D I M H L                                 |                                                                                                                       |                                                                                       |   |   |   |   |    |    |    |    |    |    |    |    |    |    |    |    |    |    |    |    |    |    |    |    |    |    |    |    |    |    |    |    |    |    |    |    |    |    |    |    |    |    |    |    |    |    |    |    |    |    |    |    |    |    |    |    |    |    |    |    |    |    |    |    |    |    |    |    |    |    |    |    |    |    |    |    |    |    |    |    |    |    |    |    |    |    |    |    |    |    |    |    |    |    |     |     |     |     |     |     |     |     |     |     |     |     |     |     |     |     |     |     |     |     |     |     |     |     |     |     |     |     |     |     |     |     |     |     |     |     |     |     |     |     |     |     |     |     |     |     |     |     |     |     |     |     |     |     |     |     |     |     |     |     |     |     |     |     |     |     |     |     |     |     |     |     |     |     |     |     |     |     |     |     |     |     |     |     |     |     |     |     |     |     |     |     |     |     |     |     |     |     |     |     |     |     |     |     |     |     |     |     |     |     |     |     |     |     |     |     |     |     |     |     |     |     |     |     |     |     |     |     |     |     |     |     |     |     |     |     |     |     |     |     |     |     |     |     |     |     |     |     |     |     |     |     |     |     |     |     |     |     |     |     |     |     |     |     |     |     |     |     |     |     |     |     |     |     |     |     |     |     |     |     |     |     |     |     |     |     |     |     |     |     |     |     |     |     |     |     |     |     |     |     |     |     |     |     |     |     |     |     |     |     |     |     |     |     |     |     |     |     |     |     |     |     |     |     |     |     |     |     |     |     |     |     |     |     |     |     |     |     |     |     |     |     |     |     |     |     |     |     |     |     |     |     |     |     |     |     |     |     |     |     |     |     |     |     |     |     |     |     |     |     |     |     |     |     |     |     |     |     |     |     |     |     |     |     |     |     |     |     |     |     |     |     |     |     |     |     |     |     |     |     |     |     |     |     |     |     |     |     |     |     |     |     |     |     |     |     |     |     |     |     |     |     |     |     |     |     |     |     |     |     |     |     |     |     |     |     |     |     |     |     |     |     |     |     |     |     |     |     |     |     |     |     |     |     |     |     |     |     |     |     |     |     |     |     |     |     |     |     |     |     |     |     |     |     |     |     |     |     |     |     |     |     |     |     |     |     |     |     |     |     |     |     |     |     |     |     |     |     |     |     |     |     |     |     |     |     |     |     |     |     |     |     |     |     |     |     |     |     |     |     |     |     |     |     |     |     |     |     |     |     |     |     |     |     |     |     |     |     |     |     |     |     |     |     |     |     |     |     |     |     |     |     |     |     |     |     |     |     |     |     |     |     |     |     |     |     |     |     |     |     |     |     |     |     |     |     |     |     |     |     |     |     |     |     |     |     |     |     |     |     |     |     |     |     |     |     |     |     |     |     |     |     |     |     |     |     |     |     |     |     |     |     |     |     |     |     |     |     |     |     |     |     |     |     |     |     |     |     |     |     |     |     |     |     |     |     |     |     |     |     |     |     |     |     |     |     |     |     |     |     |     |     |     |     |     |     |     |     |     |     |     |     |     |     |     |     |     |     |     |     |     |     |     |     |     |     |     |     |     |     |     |     |     |     |     |     |     |     |     |     |     |     |     |     |     |     |     |     |     |     |     |     |     |     |     |     |     |     |     |     |     |     |     |     |     |     |     |     |     |     |     |     |     |     |     |     |     |     |     |     |     |     |     |     |     |     |     |     |     |     |     |     |     |     |     |     |     |     |     |     |     |     |     |     |     |     |     |     |     |     |     |     |     |     |     |     |     |     |     |     |     |     |     |     |     |     |     |     |     |     |     |     |     |     |     |     |     |     |     |     |     |     |     |     |     |     |     |     |     |     |     |     |     |     |     |     |     |     |     |     |     |     |     |     |     |     |     |     |     |     |     |     |     |     |     |     |     |     |     |     |     |     |     |     |     |     |     |     |     |     |     |     |     |     |     |     |     |     |     |     |     |     |     |     |     |     |     |     |     |     |     |     |     |     |     |     |     |     |     |     |     |     |     |     |     |     |     |     |     |     |     |     |     |     |     |     |     |     |     |     |     |     |     |     |     |     |     |     |     |     |     |     |     |     |     |     |     |     |     |     |     |     |     |     |     |     |     |     |     |     |     |     |     |     |     |     |     |     |     |     |     |     |     |     |     |     |     |     |     |     |     |     |     |     |     |     |     |     |     |     |     |     |     |     |     |     |     |     |     |     |     |     |     |     |     |     |     |     |     |     |     |     |     |     |     |     |     |     |     |     |     |     |     |     |     |     |     |     |     |     |     |     |     |     |     |     |     |     |     |
| KM388817/strain 2A/VEN/2004      |                          | Monkey                       | K V V R V V A R N P T T A R M A G V N A P K S A P K I I A V I T N A M I V A V S R A F A K E R Q P I A S N T A R V T M | L I I H A N K T R K K T V R V D T P G T I N K I A I A R T V K A N I V S K K D I M H L                                 |                                                                                                                       |                                                                                       |   |   |   |   |    |    |    |    |    |    |    |    |    |    |    |    |    |    |    |    |    |    |    |    |    |    |    |    |    |    |    |    |    |    |    |    |    |    |    |    |    |    |    |    |    |    |    |    |    |    |    |    |    |    |    |    |    |    |    |    |    |    |    |    |    |    |    |    |    |    |    |    |    |    |    |    |    |    |    |    |    |    |    |    |    |    |    |    |    |    |    |    |    |    |     |     |     |     |     |     |     |     |     |     |     |     |     |     |     |     |     |     |     |     |     |     |     |     |     |     |     |     |     |     |     |     |     |     |     |     |     |     |     |     |     |     |     |     |     |     |     |     |     |     |     |     |     |     |     |     |     |     |     |     |     |     |     |     |     |     |     |     |     |     |     |     |     |     |     |     |     |     |     |     |     |     |     |     |     |     |     |     |     |     |     |     |     |     |     |     |     |     |     |     |     |     |     |     |     |     |     |     |     |     |     |     |     |     |     |     |     |     |     |     |     |     |     |     |     |     |     |     |     |     |     |     |     |     |     |     |     |     |     |     |     |     |     |     |     |     |     |     |     |     |     |     |     |     |     |     |     |     |     |     |     |     |     |     |     |     |     |     |     |     |     |     |     |     |     |     |     |     |     |     |     |     |     |     |     |     |     |     |     |     |     |     |     |     |     |     |     |     |     |     |     |     |     |     |     |     |     |     |     |     |     |     |     |     |     |     |     |     |     |     |     |     |     |     |     |     |     |     |     |     |     |     |     |     |     |     |     |     |     |     |     |     |     |     |     |     |     |     |     |     |     |     |     |     |     |     |     |     |     |     |     |     |     |     |     |     |     |     |     |     |     |     |     |     |     |     |     |     |     |     |     |     |     |     |     |     |     |     |     |     |     |     |     |     |     |     |     |     |     |     |     |     |     |     |     |     |     |     |     |     |     |     |     |     |     |     |     |     |     |     |     |     |     |     |     |     |     |     |     |     |     |     |     |     |     |     |     |     |     |     |     |     |     |     |     |     |     |     |     |     |     |     |     |     |     |     |     |     |     |     |     |     |     |     |     |     |     |     |     |     |     |     |     |     |     |     |     |     |     |     |     |     |     |     |     |     |     |     |     |     |     |     |     |     |     |     |     |     |     |     |     |     |     |     |     |     |     |     |     |     |     |     |     |     |     |     |     |     |     |     |     |     |     |     |     |     |     |     |     |     |     |     |     |     |     |     |     |     |     |     |     |     |     |     |     |     |     |     |     |     |     |     |     |     |     |     |     |     |     |     |     |     |     |     |     |     |     |     |     |     |     |     |     |     |     |     |     |     |     |     |     |     |     |     |     |     |     |     |     |     |     |     |     |     |     |     |     |     |     |     |     |     |     |     |     |     |     |     |     |     |     |     |     |     |     |     |     |     |     |     |     |     |     |     |     |     |     |     |     |     |     |     |     |     |     |     |     |     |     |     |     |     |     |     |     |     |     |     |     |     |     |     |     |     |     |     |     |     |     |     |     |     |     |     |     |     |     |     |     |     |     |     |     |     |     |     |     |     |     |     |     |     |     |     |     |     |     |     |     |     |     |     |     |     |     |     |     |     |     |     |     |     |     |     |     |     |     |     |     |     |     |     |     |     |     |     |     |     |     |     |     |     |     |     |     |     |     |     |     |     |     |     |     |     |     |     |     |     |     |     |     |     |     |     |     |     |     |     |     |     |     |     |     |     |     |     |     |     |     |     |     |     |     |     |     |     |     |     |     |     |     |     |     |     |     |     |     |     |     |     |     |     |     |     |     |     |     |     |     |     |     |     |     |     |     |     |     |     |     |     |     |     |     |     |     |     |     |     |     |     |     |     |     |     |     |     |     |     |     |     |     |     |     |     |     |     |     |     |     |     |     |     |     |     |     |     |     |     |     |     |     |     |     |     |     |     |     |     |     |     |     |     |     |     |     |     |     |     |     |     |     |     |     |     |     |     |     |     |     |     |     |     |     |     |     |     |     |     |     |     |     |     |     |     |     |     |     |     |     |     |     |     |     |     |     |     |     |     |     |     |     |     |     |     |     |     |     |     |     |     |     |     |     |     |     |     |     |     |     |     |     |     |     |     |     |     |     |     |     |     |     |     |     |     |     |     |     |     |     |     |     |     |     |     |     |     |     |     |     |     |     |     |     |     |     |     |     |     |     |     |     |     |     |     |     |     |     |     |     |     |     |     |     |     |     |     |     |     |     |     |     |     |     |     |     |     |     |     |     |     |     |     |     |     |     |     |     |     |     |
| KM388814/strain 6A/VEN/2005      |                          | Human                        | K V V R V V R N P A T A R M A G V N A P K S V P K I I A I I T N A M I V A V T R A F T K E R Q P I A S N T A R V T M   | L I I H A N K T R K E T V R V D T P G T I N K I A I A R T V K A N I V S K K D I M H L                                 |                                                                                                                       |                                                                                       |   |   |   |   |    |    |    |    |    |    |    |    |    |    |    |    |    |    |    |    |    |    |    |    |    |    |    |    |    |    |    |    |    |    |    |    |    |    |    |    |    |    |    |    |    |    |    |    |    |    |    |    |    |    |    |    |    |    |    |    |    |    |    |    |    |    |    |    |    |    |    |    |    |    |    |    |    |    |    |    |    |    |    |    |    |    |    |    |    |    |    |    |    |    |     |     |     |     |     |     |     |     |     |     |     |     |     |     |     |     |     |     |     |     |     |     |     |     |     |     |     |     |     |     |     |     |     |     |     |     |     |     |     |     |     |     |     |     |     |     |     |     |     |     |     |     |     |     |     |     |     |     |     |     |     |     |     |     |     |     |     |     |     |     |     |     |     |     |     |     |     |     |     |     |     |     |     |     |     |     |     |     |     |     |     |     |     |     |     |     |     |     |     |     |     |     |     |     |     |     |     |     |     |     |     |     |     |     |     |     |     |     |     |     |     |     |     |     |     |     |     |     |     |     |     |     |     |     |     |     |     |     |     |     |     |     |     |     |     |     |     |     |     |     |     |     |     |     |     |     |     |     |     |     |     |     |     |     |     |     |     |     |     |     |     |     |     |     |     |     |     |     |     |     |     |     |     |     |     |     |     |     |     |     |     |     |     |     |     |     |     |     |     |     |     |     |     |     |     |     |     |     |     |     |     |     |     |     |     |     |     |     |     |     |     |     |     |     |     |     |     |     |     |     |     |     |     |     |     |     |     |     |     |     |     |     |     |     |     |     |     |     |     |     |     |     |     |     |     |     |     |     |     |     |     |     |     |     |     |     |     |     |     |     |     |     |     |     |     |     |     |     |     |     |     |     |     |     |     |     |     |     |     |     |     |     |     |     |     |     |     |     |     |     |     |     |     |     |     |     |     |     |     |     |     |     |     |     |     |     |     |     |     |     |     |     |     |     |     |     |     |     |     |     |     |     |     |     |     |     |     |     |     |     |     |     |     |     |     |     |     |     |     |     |     |     |     |     |     |     |     |     |     |     |     |     |     |     |     |     |     |     |     |     |     |     |     |     |     |     |     |     |     |     |     |     |     |     |     |     |     |     |     |     |     |     |     |     |     |     |     |     |     |     |     |     |     |     |     |     |     |     |     |     |     |     |     |     |     |     |     |     |     |     |     |     |     |     |     |     |     |     |     |     |     |     |     |     |     |     |     |     |     |     |     |     |     |     |     |     |     |     |     |     |     |     |     |     |     |     |     |     |     |     |     |     |     |     |     |     |     |     |     |     |     |     |     |     |     |     |     |     |     |     |     |     |     |     |     |     |     |     |     |     |     |     |     |     |     |     |     |     |     |     |     |     |     |     |     |     |     |     |     |     |     |     |     |     |     |     |     |     |     |     |     |     |     |     |     |     |     |     |     |     |     |     |     |     |     |     |     |     |     |     |     |     |     |     |     |     |     |     |     |     |     |     |     |     |     |     |     |     |     |     |     |     |     |     |     |     |     |     |     |     |     |     |     |     |     |     |     |     |     |     |     |     |     |     |     |     |     |     |     |     |     |     |     |     |     |     |     |     |     |     |     |     |     |     |     |     |     |     |     |     |     |     |     |     |     |     |     |     |     |     |     |     |     |     |     |     |     |     |     |     |     |     |     |     |     |     |     |     |     |     |     |     |     |     |     |     |     |     |     |     |     |     |     |     |     |     |     |     |     |     |     |     |     |     |     |     |     |     |     |     |     |     |     |     |     |     |     |     |     |     |     |     |     |     |     |     |     |     |     |     |     |     |     |     |     |     |     |     |     |     |     |     |     |     |     |     |     |     |     |     |     |     |     |     |     |     |     |     |     |     |     |     |     |     |     |     |     |     |     |     |     |     |     |     |     |     |     |     |     |     |     |     |     |     |     |     |     |     |     |     |     |     |     |     |     |     |     |     |     |     |     |     |     |     |     |     |     |     |     |     |     |     |     |     |     |     |     |     |     |     |     |     |     |     |     |     |     |     |     |     |     |     |     |     |     |     |     |     |     |     |     |     |     |     |     |     |     |     |     |     |     |     |     |     |     |     |     |     |     |     |     |     |     |     |     |     |     |     |     |     |     |     |     |     |     |     |     |     |     |     |     |     |     |     |     |     |     |     |     |     |     |     |     |     |     |     |     |     |     |     |     |     |     |     |     |     |     |     |     |     |     |     |     |     |     |     |     |     |     |     |     |     |     |     |     |     |     |     |     |     |     |     |     |     |     |     |     |     |     |
| KM388818/strain 8A/VEN/2006      |                          | Monkey                       | K V V R V V V R N P A T A R M A G V N A P K S V P K I I A I I T N A M I V A V T R A F T K E R Q P I A S N K A R V T M | L I I L A S N T R K E T V R V D T P G T I N S K I A I A R T V K A N I V S K K D I M H L                               |                                                                                                                       |                                                                                       |   |   |   |   |    |    |    |    |    |    |    |    |    |    |    |    |    |    |    |    |    |    |    |    |    |    |    |    |    |    |    |    |    |    |    |    |    |    |    |    |    |    |    |    |    |    |    |    |    |    |    |    |    |    |    |    |    |    |    |    |    |    |    |    |    |    |    |    |    |    |    |    |    |    |    |    |    |    |    |    |    |    |    |    |    |    |    |    |    |    |    |    |    |    |     |     |     |     |     |     |     |     |     |     |     |     |     |     |     |     |     |     |     |     |     |     |     |     |     |     |     |     |     |     |     |     |     |     |     |     |     |     |     |     |     |     |     |     |     |     |     |     |     |     |     |     |     |     |     |     |     |     |     |     |     |     |     |     |     |     |     |     |     |     |     |     |     |     |     |     |     |     |     |     |     |     |     |     |     |     |     |     |     |     |     |     |     |     |     |     |     |     |     |     |     |     |     |     |     |     |     |     |     |     |     |     |     |     |     |     |     |     |     |     |     |     |     |     |     |     |     |     |     |     |     |     |     |     |     |     |     |     |     |     |     |     |     |     |     |     |     |     |     |     |     |     |     |     |     |     |     |     |     |     |     |     |     |     |     |     |     |     |     |     |     |     |     |     |     |     |     |     |     |     |     |     |     |     |     |     |     |     |     |     |     |     |     |     |     |     |     |     |     |     |     |     |     |     |     |     |     |     |     |     |     |     |     |     |     |     |     |     |     |     |     |     |     |     |     |     |     |     |     |     |     |     |     |     |     |     |     |     |     |     |     |     |     |     |     |     |     |     |     |     |     |     |     |     |     |     |     |     |     |     |     |     |     |     |     |     |     |     |     |     |     |     |     |     |     |     |     |     |     |     |     |     |     |     |     |     |     |     |     |     |     |     |     |     |     |     |     |     |     |     |     |     |     |     |     |     |     |     |     |     |     |     |     |     |     |     |     |     |     |     |     |     |     |     |     |     |     |     |     |     |     |     |     |     |     |     |     |     |     |     |     |     |     |     |     |     |     |     |     |     |     |     |     |     |     |     |     |     |     |     |     |     |     |     |     |     |     |     |     |     |     |     |     |     |     |     |     |     |     |     |     |     |     |     |     |     |     |     |     |     |     |     |     |     |     |     |     |     |     |     |     |     |     |     |     |     |     |     |     |     |     |     |     |     |     |     |     |     |     |     |     |     |     |     |     |     |     |     |     |     |     |     |     |     |     |     |     |     |     |     |     |     |     |     |     |     |     |     |     |     |     |     |     |     |     |     |     |     |     |     |     |     |     |     |     |     |     |     |     |     |     |     |     |     |     |     |     |     |     |     |     |     |     |     |     |     |     |     |     |     |     |     |     |     |     |     |     |     |     |     |     |     |     |     |     |     |     |     |     |     |     |     |     |     |     |     |     |     |     |     |     |     |     |     |     |     |     |     |     |     |     |     |     |     |     |     |     |     |     |     |     |     |     |     |     |     |     |     |     |     |     |     |     |     |     |     |     |     |     |     |     |     |     |     |     |     |     |     |     |     |     |     |     |     |     |     |     |     |     |     |     |     |     |     |     |     |     |     |     |     |     |     |     |     |     |     |     |     |     |     |     |     |     |     |     |     |     |     |     |     |     |     |     |     |     |     |     |     |     |     |     |     |     |     |     |     |     |     |     |     |     |     |     |     |     |     |     |     |     |     |     |     |     |     |     |     |     |     |     |     |     |     |     |     |     |     |     |     |     |     |     |     |     |     |     |     |     |     |     |     |     |     |     |     |     |     |     |     |     |     |     |     |     |     |     |     |     |     |     |     |     |     |     |     |     |     |     |     |     |     |     |     |     |     |     |     |     |     |     |     |     |     |     |     |     |     |     |     |     |     |     |     |     |     |     |     |     |     |     |     |     |     |     |     |     |     |     |     |     |     |     |     |     |     |     |     |     |     |     |     |     |     |     |     |     |     |     |     |     |     |     |     |     |     |     |     |     |     |     |     |     |     |     |     |     |     |     |     |     |     |     |     |     |     |     |     |     |     |     |     |     |     |     |     |     |     |     |     |     |     |     |     |     |     |     |     |     |     |     |     |     |     |     |     |     |     |     |     |     |     |     |     |     |     |     |     |     |     |     |     |     |     |     |     |     |     |     |     |     |     |     |     |     |     |     |     |     |     |     |     |     |     |     |     |     |     |     |     |     |     |     |     |     |     |     |     |     |     |     |     |     |     |     |     |     |     |     |     |     |     |     |     |     |     |     |     |     |     |     |     |     |     |     |     |     |     |     |     |     |
| KM388819/strain 9A/VEN/2007      |                          | Monkey                       | K V V R V V R N P A T A R M A G V N A P K S V P K I I A I I S A M I V A V T R A F T K E R Q P V A S N T A R V T M     | L I I H A S K T R K E T V R V D T P G T I N K I A I A R T V K A N I V S K K D I M H L                                 |                                                                                                                       |                                                                                       |   |   |   |   |    |    |    |    |    |    |    |    |    |    |    |    |    |    |    |    |    |    |    |    |    |    |    |    |    |    |    |    |    |    |    |    |    |    |    |    |    |    |    |    |    |    |    |    |    |    |    |    |    |    |    |    |    |    |    |    |    |    |    |    |    |    |    |    |    |    |    |    |    |    |    |    |    |    |    |    |    |    |    |    |    |    |    |    |    |    |    |    |    |    |     |     |     |     |     |     |     |     |     |     |     |     |     |     |     |     |     |     |     |     |     |     |     |     |     |     |     |     |     |     |     |     |     |     |     |     |     |     |     |     |     |     |     |     |     |     |     |     |     |     |     |     |     |     |     |     |     |     |     |     |     |     |     |     |     |     |     |     |     |     |     |     |     |     |     |     |     |     |     |     |     |     |     |     |     |     |     |     |     |     |     |     |     |     |     |     |     |     |     |     |     |     |     |     |     |     |     |     |     |     |     |     |     |     |     |     |     |     |     |     |     |     |     |     |     |     |     |     |     |     |     |     |     |     |     |     |     |     |     |     |     |     |     |     |     |     |     |     |     |     |     |     |     |     |     |     |     |     |     |     |     |     |     |     |     |     |     |     |     |     |     |     |     |     |     |     |     |     |     |     |     |     |     |     |     |     |     |     |     |     |     |     |     |     |     |     |     |     |     |     |     |     |     |     |     |     |     |     |     |     |     |     |     |     |     |     |     |     |     |     |     |     |     |     |     |     |     |     |     |     |     |     |     |     |     |     |     |     |     |     |     |     |     |     |     |     |     |     |     |     |     |     |     |     |     |     |     |     |     |     |     |     |     |     |     |     |     |     |     |     |     |     |     |     |     |     |     |     |     |     |     |     |     |     |     |     |     |     |     |     |     |     |     |     |     |     |     |     |     |     |     |     |     |     |     |     |     |     |     |     |     |     |     |     |     |     |     |     |     |     |     |     |     |     |     |     |     |     |     |     |     |     |     |     |     |     |     |     |     |     |     |     |     |     |     |     |     |     |     |     |     |     |     |     |     |     |     |     |     |     |     |     |     |     |     |     |     |     |     |     |     |     |     |     |     |     |     |     |     |     |     |     |     |     |     |     |     |     |     |     |     |     |     |     |     |     |     |     |     |     |     |     |     |     |     |     |     |     |     |     |     |     |     |     |     |     |     |     |     |     |     |     |     |     |     |     |     |     |     |     |     |     |     |     |     |     |     |     |     |     |     |     |     |     |     |     |     |     |     |     |     |     |     |     |     |     |     |     |     |     |     |     |     |     |     |     |     |     |     |     |     |     |     |     |     |     |     |     |     |     |     |     |     |     |     |     |     |     |     |     |     |     |     |     |     |     |     |     |     |     |     |     |     |     |     |     |     |     |     |     |     |     |     |     |     |     |     |     |     |     |     |     |     |     |     |     |     |     |     |     |     |     |     |     |     |     |     |     |     |     |     |     |     |     |     |     |     |     |     |     |     |     |     |     |     |     |     |     |     |     |     |     |     |     |     |     |     |     |     |     |     |     |     |     |     |     |     |     |     |     |     |     |     |     |     |     |     |     |     |     |     |     |     |     |     |     |     |     |     |     |     |     |     |     |     |     |     |     |     |     |     |     |     |     |     |     |     |     |     |     |     |     |     |     |     |     |     |     |     |     |     |     |     |     |     |     |     |     |     |     |     |     |     |     |     |     |     |     |     |     |     |     |     |     |     |     |     |     |     |     |     |     |     |     |     |     |     |     |     |     |     |     |     |     |     |     |     |     |     |     |     |     |     |     |     |     |     |     |     |     |     |     |     |     |     |     |     |     |     |     |     |     |     |     |     |     |     |     |     |     |     |     |     |     |     |     |     |     |     |     |     |     |     |     |     |     |     |     |     |     |     |     |     |     |     |     |     |     |     |     |     |     |     |     |     |     |     |     |     |     |     |     |     |     |     |     |     |     |     |     |     |     |     |     |     |     |     |     |     |     |     |     |     |     |     |     |     |     |     |     |     |     |     |     |     |     |     |     |     |     |     |     |     |     |     |     |     |     |     |     |     |     |     |     |     |     |     |     |     |     |     |     |     |     |     |     |     |     |     |     |     |     |     |     |     |     |     |     |     |     |     |     |     |     |     |     |     |     |     |     |     |     |     |     |     |     |     |     |     |     |     |     |     |     |     |     |     |     |     |     |     |     |     |     |     |     |     |     |     |     |     |     |     |     |     |     |     |     |     |     |     |     |     |     |     |     |     |     |     |     |     |     |     |     |     |     |     |     |     |
| KY861728/BeAn754036/BRA/2008     |                          | Human                        | K V V R V V V R N P A T A R M A G V N A P K N V S K I I A V I T N A M I V A V S R A F A K E R R P I A S N T A R V T M | L I I H A N K T K K E T V R V D T P G T I N K I A I A R T V K A N I V S K K N I M H L                                 |                                                                                                                       |                                                                                       |   |   |   |   |    |    |    |    |    |    |    |    |    |    |    |    |    |    |    |    |    |    |    |    |    |    |    |    |    |    |    |    |    |    |    |    |    |    |    |    |    |    |    |    |    |    |    |    |    |    |    |    |    |    |    |    |    |    |    |    |    |    |    |    |    |    |    |    |    |    |    |    |    |    |    |    |    |    |    |    |    |    |    |    |    |    |    |    |    |    |    |    |    |    |     |     |     |     |     |     |     |     |     |     |     |     |     |     |     |     |     |     |     |     |     |     |     |     |     |     |     |     |     |     |     |     |     |     |     |     |     |     |     |     |     |     |     |     |     |     |     |     |     |     |     |     |     |     |     |     |     |     |     |     |     |     |     |     |     |     |     |     |     |     |     |     |     |     |     |     |     |     |     |     |     |     |     |     |     |     |     |     |     |     |     |     |     |     |     |     |     |     |     |     |     |     |     |     |     |     |     |     |     |     |     |     |     |     |     |     |     |     |     |     |     |     |     |     |     |     |     |     |     |     |     |     |     |     |     |     |     |     |     |     |     |     |     |     |     |     |     |     |     |     |     |     |     |     |     |     |     |     |     |     |     |     |     |     |     |     |     |     |     |     |     |     |     |     |     |     |     |     |     |     |     |     |     |     |     |     |     |     |     |     |     |     |     |     |     |     |     |     |     |     |     |     |     |     |     |     |     |     |     |     |     |     |     |     |     |     |     |     |     |     |     |     |     |     |     |     |     |     |     |     |     |     |     |     |     |     |     |     |     |     |     |     |     |     |     |     |     |     |     |     |     |     |     |     |     |     |     |     |     |     |     |     |     |     |     |     |     |     |     |     |     |     |     |     |     |     |     |     |     |     |     |     |     |     |     |     |     |     |     |     |     |     |     |     |     |     |     |     |     |     |     |     |     |     |     |     |     |     |     |     |     |     |     |     |     |     |     |     |     |     |     |     |     |     |     |     |     |     |     |     |     |     |     |     |     |     |     |     |     |     |     |     |     |     |     |     |     |     |     |     |     |     |     |     |     |     |     |     |     |     |     |     |     |     |     |     |     |     |     |     |     |     |     |     |     |     |     |     |     |     |     |     |     |     |     |     |     |     |     |     |     |     |     |     |     |     |     |     |     |     |     |     |     |     |     |     |     |     |     |     |     |     |     |     |     |     |     |     |     |     |     |     |     |     |     |     |     |     |     |     |     |     |     |     |     |     |     |     |     |     |     |     |     |     |     |     |     |     |     |     |     |     |     |     |     |     |     |     |     |     |     |     |     |     |     |     |     |     |     |     |     |     |     |     |     |     |     |     |     |     |     |     |     |     |     |     |     |     |     |     |     |     |     |     |     |     |     |     |     |     |     |     |     |     |     |     |     |     |     |     |     |     |     |     |     |     |     |     |     |     |     |     |     |     |     |     |     |     |     |     |     |     |     |     |     |     |     |     |     |     |     |     |     |     |     |     |     |     |     |     |     |     |     |     |     |     |     |     |     |     |     |     |     |     |     |     |     |     |     |     |     |     |     |     |     |     |     |     |     |     |     |     |     |     |     |     |     |     |     |     |     |     |     |     |     |     |     |     |     |     |     |     |     |     |     |     |     |     |     |     |     |     |     |     |     |     |     |     |     |     |     |     |     |     |     |     |     |     |     |     |     |     |     |     |     |     |     |     |     |     |     |     |     |     |     |     |     |     |     |     |     |     |     |     |     |     |     |     |     |     |     |     |     |     |     |     |     |     |     |     |     |     |     |     |     |     |     |     |     |     |     |     |     |     |     |     |     |     |     |     |     |     |     |     |     |     |     |     |     |     |     |     |     |     |     |     |     |     |     |     |     |     |     |     |     |     |     |     |     |     |     |     |     |     |     |     |     |     |     |     |     |     |     |     |     |     |     |     |     |     |     |     |     |     |     |     |     |     |     |     |     |     |     |     |     |     |     |     |     |     |     |     |     |     |     |     |     |     |     |     |     |     |     |     |     |     |     |     |     |     |     |     |     |     |     |     |     |     |     |     |     |     |     |     |     |     |     |     |     |     |     |     |     |     |     |     |     |     |     |     |     |     |     |     |     |     |     |     |     |     |     |     |     |     |     |     |     |     |     |     |     |     |     |     |     |     |     |     |     |     |     |     |     |     |     |     |     |     |     |     |     |     |     |     |     |     |     |     |     |     |     |     |     |     |     |     |     |     |     |     |     |     |     |     |     |     |     |     |     |     |     |     |     |     |     |     |     |     |     |     |     |     |     |     |     |     |     |     |     |
| KM388816/strain 10A/VEN/2010     |                          | Monkey                       | K V V R V V V R N P A T A R M A G V N A P K S V P K I I A V I T N A M I V A V S R A F A K E R Q P I A S N T A R V T M | L I I H A N K T R K E T V R V D T P G T I N K I T I A R T V K T N I V S K K D I M H L                                 |                                                                                                                       |                                                                                       |   |   |   |   |    |    |    |    |    |    |    |    |    |    |    |    |    |    |    |    |    |    |    |    |    |    |    |    |    |    |    |    |    |    |    |    |    |    |    |    |    |    |    |    |    |    |    |    |    |    |    |    |    |    |    |    |    |    |    |    |    |    |    |    |    |    |    |    |    |    |    |    |    |    |    |    |    |    |    |    |    |    |    |    |    |    |    |    |    |    |    |    |    |    |     |     |     |     |     |     |     |     |     |     |     |     |     |     |     |     |     |     |     |     |     |     |     |     |     |     |     |     |     |     |     |     |     |     |     |     |     |     |     |     |     |     |     |     |     |     |     |     |     |     |     |     |     |     |     |     |     |     |     |     |     |     |     |     |     |     |     |     |     |     |     |     |     |     |     |     |     |     |     |     |     |     |     |     |     |     |     |     |     |     |     |     |     |     |     |     |     |     |     |     |     |     |     |     |     |     |     |     |     |     |     |     |     |     |     |     |     |     |     |     |     |     |     |     |     |     |     |     |     |     |     |     |     |     |     |     |     |     |     |     |     |     |     |     |     |     |     |     |     |     |     |     |     |     |     |     |     |     |     |     |     |     |     |     |     |     |     |     |     |     |     |     |     |     |     |     |     |     |     |     |     |     |     |     |     |     |     |     |     |     |     |     |     |     |     |     |     |     |     |     |     |     |     |     |     |     |     |     |     |     |     |     |     |     |     |     |     |     |     |     |     |     |     |     |     |     |     |     |     |     |     |     |     |     |     |     |     |     |     |     |     |     |     |     |     |     |     |     |     |     |     |     |     |     |     |     |     |     |     |     |     |     |     |     |     |     |     |     |     |     |     |     |     |     |     |     |     |     |     |     |     |     |     |     |     |     |     |     |     |     |     |     |     |     |     |     |     |     |     |     |     |     |     |     |     |     |     |     |     |     |     |     |     |     |     |     |     |     |     |     |     |     |     |     |     |     |     |     |     |     |     |     |     |     |     |     |     |     |     |     |     |     |     |     |     |     |     |     |     |     |     |     |     |     |     |     |     |     |     |     |     |     |     |     |     |     |     |     |     |     |     |     |     |     |     |     |     |     |     |     |     |     |     |     |     |     |     |     |     |     |     |     |     |     |     |     |     |     |     |     |     |     |     |     |     |     |     |     |     |     |     |     |     |     |     |     |     |     |     |     |     |     |     |     |     |     |     |     |     |     |     |     |     |     |     |     |     |     |     |     |     |     |     |     |     |     |     |     |     |     |     |     |     |     |     |     |     |     |     |     |     |     |     |     |     |     |     |     |     |     |     |     |     |     |     |     |     |     |     |     |     |     |     |     |     |     |     |     |     |     |     |     |     |     |     |     |     |     |     |     |     |     |     |     |     |     |     |     |     |     |     |     |     |     |     |     |     |     |     |     |     |     |     |     |     |     |     |     |     |     |     |     |     |     |     |     |     |     |     |     |     |     |     |     |     |     |     |     |     |     |     |     |     |     |     |     |     |     |     |     |     |     |     |     |     |     |     |     |     |     |     |     |     |     |     |     |     |     |     |     |     |     |     |     |     |     |     |     |     |     |     |     |     |     |     |     |     |     |     |     |     |     |     |     |     |     |     |     |     |     |     |     |     |     |     |     |     |     |     |     |     |     |     |     |     |     |     |     |     |     |     |     |     |     |     |     |     |     |     |     |     |     |     |     |     |     |     |     |     |     |     |     |     |     |     |     |     |     |     |     |     |     |     |     |     |     |     |     |     |     |     |     |     |     |     |     |     |     |     |     |     |     |     |     |     |     |     |     |     |     |     |     |     |     |     |     |     |     |     |     |     |     |     |     |     |     |     |     |     |     |     |     |     |     |     |     |     |     |     |     |     |     |     |     |     |     |     |     |     |     |     |     |     |     |     |     |     |     |     |     |     |     |     |     |     |     |     |     |     |     |     |     |     |     |     |     |     |     |     |     |     |     |     |     |     |     |     |     |     |     |     |     |     |     |     |     |     |     |     |     |     |     |     |     |     |     |     |     |     |     |     |     |     |     |     |     |     |     |     |     |     |     |     |     |     |     |     |     |     |     |     |     |     |     |     |     |     |     |     |     |     |     |     |     |     |     |     |     |     |     |     |     |     |     |     |     |     |     |     |     |     |     |     |     |     |     |     |     |     |     |     |     |     |     |     |     |     |     |     |     |     |     |     |     |     |     |     |     |     |     |     |     |     |     |     |     |     |     |     |     |     |     |     |     |     |     |     |     |     |     |     |     |     |     |     |     |     |     |     |
| 1E                               | KY885000/ES-504/BRA/2017 | Monkey                       | K V V R V I V R N P A T A R M A G V N A P K S V P K I I A V I T N A M I V A V S R A F A K D K Q P I A S N T A R V T M | L I I H A N K T R R E T V R I D T P S T I S K I A I A R T A K A S I V S K K D I M H L                                 |                                                                                                                       |                                                                                       |   |   |   |   |    |    |    |    |    |    |    |    |    |    |    |    |    |    |    |    |    |    |    |    |    |    |    |    |    |    |    |    |    |    |    |    |    |    |    |    |    |    |    |    |    |    |    |    |    |    |    |    |    |    |    |    |    |    |    |    |    |    |    |    |    |    |    |    |    |    |    |    |    |    |    |    |    |    |    |    |    |    |    |    |    |    |    |    |    |    |    |    |    |    |     |     |     |     |     |     |     |     |     |     |     |     |     |     |     |     |     |     |     |     |     |     |     |     |     |     |     |     |     |     |     |     |     |     |     |     |     |     |     |     |     |     |     |     |     |     |     |     |     |     |     |     |     |     |     |     |     |     |     |     |     |     |     |     |     |     |     |     |     |     |     |     |     |     |     |     |     |     |     |     |     |     |     |     |     |     |     |     |     |     |     |     |     |     |     |     |     |     |     |     |     |     |     |     |     |     |     |     |     |     |     |     |     |     |     |     |     |     |     |     |     |     |     |     |     |     |     |     |     |     |     |     |     |     |     |     |     |     |     |     |     |     |     |     |     |     |     |     |     |     |     |     |     |     |     |     |     |     |     |     |     |     |     |     |     |     |     |     |     |     |     |     |     |     |     |     |     |     |     |     |     |     |     |     |     |     |     |     |     |     |     |     |     |     |     |     |     |     |     |     |     |     |     |     |     |     |     |     |     |     |     |     |     |     |     |     |     |     |     |     |     |     |     |     |     |     |     |     |     |     |     |     |     |     |     |     |     |     |     |     |     |     |     |     |     |     |     |     |     |     |     |     |     |     |     |     |     |     |     |     |     |     |     |     |     |     |     |     |     |     |     |     |     |     |     |     |     |     |     |     |     |     |     |     |     |     |     |     |     |     |     |     |     |     |     |     |     |     |     |     |     |     |     |     |     |     |     |     |     |     |     |     |     |     |     |     |     |     |     |     |     |     |     |     |     |     |     |     |     |     |     |     |     |     |     |     |     |     |     |     |     |     |     |     |     |     |     |     |     |     |     |     |     |     |     |     |     |     |     |     |     |     |     |     |     |     |     |     |     |     |     |     |     |     |     |     |     |     |     |     |     |     |     |     |     |     |     |     |     |     |     |     |     |     |     |     |     |     |     |     |     |     |     |     |     |     |     |     |     |     |     |     |     |     |     |     |     |     |     |     |     |     |     |     |     |     |     |     |     |     |     |     |     |     |     |     |     |     |     |     |     |     |     |     |     |     |     |     |     |     |     |     |     |     |     |     |     |     |     |     |     |     |     |     |     |     |     |     |     |     |     |     |     |     |     |     |     |     |     |     |     |     |     |     |     |     |     |     |     |     |     |     |     |     |     |     |     |     |     |     |     |     |     |     |     |     |     |     |     |     |     |     |     |     |     |     |     |     |     |     |     |     |     |     |     |     |     |     |     |     |     |     |     |     |     |     |     |     |     |     |     |     |     |     |     |     |     |     |     |     |     |     |     |     |     |     |     |     |     |     |     |     |     |     |     |     |     |     |     |     |     |     |     |     |     |     |     |     |     |     |     |     |     |     |     |     |     |     |     |     |     |     |     |     |     |     |     |     |     |     |     |     |     |     |     |     |     |     |     |     |     |     |     |     |     |     |     |     |     |     |     |     |     |     |     |     |     |     |     |     |     |     |     |     |     |     |     |     |     |     |     |     |     |     |     |     |     |     |     |     |     |     |     |     |     |     |     |     |     |     |     |     |     |     |     |     |     |     |     |     |     |     |     |     |     |     |     |     |     |     |     |     |     |     |     |     |     |     |     |     |     |     |     |     |     |     |     |     |     |     |     |     |     |     |     |     |     |     |     |     |     |     |     |     |     |     |     |     |     |     |     |     |     |     |     |     |     |     |     |     |     |     |     |     |     |     |     |     |     |     |     |     |     |     |     |     |     |     |     |     |     |     |     |     |     |     |     |     |     |     |     |     |     |     |     |     |     |     |     |     |     |     |     |     |     |     |     |     |     |     |     |     |     |     |     |     |     |     |     |     |     |     |     |     |     |     |     |     |     |     |     |     |     |     |     |     |     |     |     |     |     |     |     |     |     |     |     |     |     |     |     |     |     |     |     |     |     |     |     |     |     |     |     |     |     |     |     |     |     |     |     |     |     |     |     |     |     |     |     |     |     |     |     |     |     |     |     |     |     |     |     |     |     |     |     |     |     |     |     |     |     |     |     |     |     |     |     |     |     |     |     |     |     |     |     |     |     |     |     |     |     |     |     |     |     |     |     |     |     |
|                                  | KY885001/ES-505/BRA/2017 | Monkey                       | K V V R V I V R N P A T A R M A G V N A P K S V P K I I A V I T N A M I V A V S R A F A K D K Q P I A S N T A R V T M | L I I H A N K T R R E T V R I D T P S T I S K I A I A R T A K A S I V S K K D I M H L                                 |                                                                                                                       |                                                                                       |   |   |   |   |    |    |    |    |    |    |    |    |    |    |    |    |    |    |    |    |    |    |    |    |    |    |    |    |    |    |    |    |    |    |    |    |    |    |    |    |    |    |    |    |    |    |    |    |    |    |    |    |    |    |    |    |    |    |    |    |    |    |    |    |    |    |    |    |    |    |    |    |    |    |    |    |    |    |    |    |    |    |    |    |    |    |    |    |    |    |    |    |    |    |     |     |     |     |     |     |     |     |     |     |     |     |     |     |     |     |     |     |     |     |     |     |     |     |     |     |     |     |     |     |     |     |     |     |     |     |     |     |     |     |     |     |     |     |     |     |     |     |     |     |     |     |     |     |     |     |     |     |     |     |     |     |     |     |     |     |     |     |     |     |     |     |     |     |     |     |     |     |     |     |     |     |     |     |     |     |     |     |     |     |     |     |     |     |     |     |     |     |     |     |     |     |     |     |     |     |     |     |     |     |     |     |     |     |     |     |     |     |     |     |     |     |     |     |     |     |     |     |     |     |     |     |     |     |     |     |     |     |     |     |     |     |     |     |     |     |     |     |     |     |     |     |     |     |     |     |     |     |     |     |     |     |     |     |     |     |     |     |     |     |     |     |     |     |     |     |     |     |     |     |     |     |     |     |     |     |     |     |     |     |     |     |     |     |     |     |     |     |     |     |     |     |     |     |     |     |     |     |     |     |     |     |     |     |     |     |     |     |     |     |     |     |     |     |     |     |     |     |     |     |     |     |     |     |     |     |     |     |     |     |     |     |     |     |     |     |     |     |     |     |     |     |     |     |     |     |     |     |     |     |     |     |     |     |     |     |     |     |     |     |     |     |     |     |     |     |     |     |     |     |     |     |     |     |     |     |     |     |     |     |     |     |     |     |     |     |     |     |     |     |     |     |     |     |     |     |     |     |     |     |     |     |     |     |     |     |     |     |     |     |     |     |     |     |     |     |     |     |     |     |     |     |     |     |     |     |     |     |     |     |     |     |     |     |     |     |     |     |     |     |     |     |     |     |     |     |     |     |     |     |     |     |     |     |     |     |     |     |     |     |     |     |     |     |     |     |     |     |     |     |     |     |     |     |     |     |     |     |     |     |     |     |     |     |     |     |     |     |     |     |     |     |     |     |     |     |     |     |     |     |     |     |     |     |     |     |     |     |     |     |     |     |     |     |     |     |     |     |     |     |     |     |     |     |     |     |     |     |     |     |     |     |     |     |     |     |     |     |     |     |     |     |     |     |     |     |     |     |     |     |     |     |     |     |     |     |     |     |     |     |     |     |     |     |     |     |     |     |     |     |     |     |     |     |     |     |     |     |     |     |     |     |     |     |     |     |     |     |     |     |     |     |     |     |     |     |     |     |     |     |     |     |     |     |     |     |     |     |     |     |     |     |     |     |     |     |     |     |     |     |     |     |     |     |     |     |     |     |     |     |     |     |     |     |     |     |     |     |     |     |     |     |     |     |     |     |     |     |     |     |     |     |     |     |     |     |     |     |     |     |     |     |     |     |     |     |     |     |     |     |     |     |     |     |     |     |     |     |     |     |     |     |     |     |     |     |     |     |     |     |     |     |     |     |     |     |     |     |     |     |     |     |     |     |     |     |     |     |     |     |     |     |     |     |     |     |     |     |     |     |     |     |     |     |     |     |     |     |     |     |     |     |     |     |     |     |     |     |     |     |     |     |     |     |     |     |     |     |     |     |     |     |     |     |     |     |     |     |     |     |     |     |     |     |     |     |     |     |     |     |     |     |     |     |     |     |     |     |     |     |     |     |     |     |     |     |     |     |     |     |     |     |     |     |     |     |     |     |     |     |     |     |     |     |     |     |     |     |     |     |     |     |     |     |     |     |     |     |     |     |     |     |     |     |     |     |     |     |     |     |     |     |     |     |     |     |     |     |     |     |     |     |     |     |     |     |     |     |     |     |     |     |     |     |     |     |     |     |     |     |     |     |     |     |     |     |     |     |     |     |     |     |     |     |     |     |     |     |     |     |     |     |     |     |     |     |     |     |     |     |     |     |     |     |     |     |     |     |     |     |     |     |     |     |     |     |     |     |     |     |     |     |     |     |     |     |     |     |     |     |     |     |     |     |     |     |     |     |     |     |     |     |     |     |     |     |     |     |     |     |     |     |     |     |     |     |     |     |     |     |     |     |     |     |     |     |     |     |     |     |     |     |     |     |     |     |     |     |     |     |     |     |     |     |     |     |     |     |     |     |     |     |     |     |     |     |     |     |     |
|                                  | MF423375/RJ87/BRA/2017   | Monkey                       | K V V R V I V R N P A T A R M A G V N A P K S V P K I I A V I T N A M I V A V S R A F A K D K Q P I A S N T A R V T M | L I I H A N K T R R E T V R I D T P S T I S K I A I A R T A K A S I V S K K D I M H L                                 |                                                                                                                       |                                                                                       |   |   |   |   |    |    |    |    |    |    |    |    |    |    |    |    |    |    |    |    |    |    |    |    |    |    |    |    |    |    |    |    |    |    |    |    |    |    |    |    |    |    |    |    |    |    |    |    |    |    |    |    |    |    |    |    |    |    |    |    |    |    |    |    |    |    |    |    |    |    |    |    |    |    |    |    |    |    |    |    |    |    |    |    |    |    |    |    |    |    |    |    |    |    |     |     |     |     |     |     |     |     |     |     |     |     |     |     |     |     |     |     |     |     |     |     |     |     |     |     |     |     |     |     |     |     |     |     |     |     |     |     |     |     |     |     |     |     |     |     |     |     |     |     |     |     |     |     |     |     |     |     |     |     |     |     |     |     |     |     |     |     |     |     |     |     |     |     |     |     |     |     |     |     |     |     |     |     |     |     |     |     |     |     |     |     |     |     |     |     |     |     |     |     |     |     |     |     |     |     |     |     |     |     |     |     |     |     |     |     |     |     |     |     |     |     |     |     |     |     |     |     |     |     |     |     |     |     |     |     |     |     |     |     |     |     |     |     |     |     |     |     |     |     |     |     |     |     |     |     |     |     |     |     |     |     |     |     |     |     |     |     |     |     |     |     |     |     |     |     |     |     |     |     |     |     |     |     |     |     |     |     |     |     |     |     |     |     |     |     |     |     |     |     |     |     |     |     |     |     |     |     |     |     |     |     |     |     |     |     |     |     |     |     |     |     |     |     |     |     |     |     |     |     |     |     |     |     |     |     |     |     |     |     |     |     |     |     |     |     |     |     |     |     |     |     |     |     |     |     |     |     |     |     |     |     |     |     |     |     |     |     |     |     |     |     |     |     |     |     |     |     |     |     |     |     |     |     |     |     |     |     |     |     |     |     |     |     |     |     |     |     |     |     |     |     |     |     |     |     |     |     |     |     |     |     |     |     |     |     |     |     |     |     |     |     |     |     |     |     |     |     |     |     |     |     |     |     |     |     |     |     |     |     |     |     |     |     |     |     |     |     |     |     |     |     |     |     |     |     |     |     |     |     |     |     |     |     |     |     |     |     |     |     |     |     |     |     |     |     |     |     |     |     |     |     |     |     |     |     |     |     |     |     |     |     |     |     |     |     |     |     |     |     |     |     |     |     |     |     |     |     |     |     |     |     |     |     |     |     |     |     |     |     |     |     |     |     |     |     |     |     |     |     |     |     |     |     |     |     |     |     |     |     |     |     |     |     |     |     |     |     |     |     |     |     |     |     |     |     |     |     |     |     |     |     |     |     |     |     |     |     |     |     |     |     |     |     |     |     |     |     |     |     |     |     |     |     |     |     |     |     |     |     |     |     |     |     |     |     |     |     |     |     |     |     |     |     |     |     |     |     |     |     |     |     |     |     |     |     |     |     |     |     |     |     |     |     |     |     |     |     |     |     |     |     |     |     |     |     |     |     |     |     |     |     |     |     |     |     |     |     |     |     |     |     |     |     |     |     |     |     |     |     |     |     |     |     |     |     |     |     |     |     |     |     |     |     |     |     |     |     |     |     |     |     |     |     |     |     |     |     |     |     |     |     |     |     |     |     |     |     |     |     |     |     |     |     |     |     |     |     |     |     |     |     |     |     |     |     |     |     |     |     |     |     |     |     |     |     |     |     |     |     |     |     |     |     |     |     |     |     |     |     |     |     |     |     |     |     |     |     |     |     |     |     |     |     |     |     |     |     |     |     |     |     |     |     |     |     |     |     |     |     |     |     |     |     |     |     |     |     |     |     |     |     |     |     |     |     |     |     |     |     |     |     |     |     |     |     |     |     |     |     |     |     |     |     |     |     |     |     |     |     |     |     |     |     |     |     |     |     |     |     |     |     |     |     |     |     |     |     |     |     |     |     |     |     |     |     |     |     |     |     |     |     |     |     |     |     |     |     |     |     |     |     |     |     |     |     |     |     |     |     |     |     |     |     |     |     |     |     |     |     |     |     |     |     |     |     |     |     |     |     |     |     |     |     |     |     |     |     |     |     |     |     |     |     |     |     |     |     |     |     |     |     |     |     |     |     |     |     |     |     |     |     |     |     |     |     |     |     |     |     |     |     |     |     |     |     |     |     |     |     |     |     |     |     |     |     |     |     |     |     |     |     |     |     |     |     |     |     |     |     |     |     |     |     |     |     |     |     |     |     |     |     |     |     |     |     |     |     |     |     |     |     |     |     |     |     |     |     |     |     |     |     |     |     |     |     |     |     |     |     |     |     |     |     |     |     |     |     |     |
|                                  | MF423376/RJ94/BRA/2017   | Monkey                       | K V V R V I V R N P A T A R M A G V N A P K S V P K I I A V I T N A M I V A V S R A F A K D K Q P I A S N T A R V T M | L I I H A N K T R R E T V R I D T P S T I S K I A I A R T A K A S I V S K K D I M H L                                 |                                                                                                                       |                                                                                       |   |   |   |   |    |    |    |    |    |    |    |    |    |    |    |    |    |    |    |    |    |    |    |    |    |    |    |    |    |    |    |    |    |    |    |    |    |    |    |    |    |    |    |    |    |    |    |    |    |    |    |    |    |    |    |    |    |    |    |    |    |    |    |    |    |    |    |    |    |    |    |    |    |    |    |    |    |    |    |    |    |    |    |    |    |    |    |    |    |    |    |    |    |    |     |     |     |     |     |     |     |     |     |     |     |     |     |     |     |     |     |     |     |     |     |     |     |     |     |     |     |     |     |     |     |     |     |     |     |     |     |     |     |     |     |     |     |     |     |     |     |     |     |     |     |     |     |     |     |     |     |     |     |     |     |     |     |     |     |     |     |     |     |     |     |     |     |     |     |     |     |     |     |     |     |     |     |     |     |     |     |     |     |     |     |     |     |     |     |     |     |     |     |     |     |     |     |     |     |     |     |     |     |     |     |     |     |     |     |     |     |     |     |     |     |     |     |     |     |     |     |     |     |     |     |     |     |     |     |     |     |     |     |     |     |     |     |     |     |     |     |     |     |     |     |     |     |     |     |     |     |     |     |     |     |     |     |     |     |     |     |     |     |     |     |     |     |     |     |     |     |     |     |     |     |     |     |     |     |     |     |     |     |     |     |     |     |     |     |     |     |     |     |     |     |     |     |     |     |     |     |     |     |     |     |     |     |     |     |     |     |     |     |     |     |     |     |     |     |     |     |     |     |     |     |     |     |     |     |     |     |     |     |     |     |     |     |     |     |     |     |     |     |     |     |     |     |     |     |     |     |     |     |     |     |     |     |     |     |     |     |     |     |     |     |     |     |     |     |     |     |     |     |     |     |     |     |     |     |     |     |     |     |     |     |     |     |     |     |     |     |     |     |     |     |     |     |     |     |     |     |     |     |     |     |     |     |     |     |     |     |     |     |     |     |     |     |     |     |     |     |     |     |     |     |     |     |     |     |     |     |     |     |     |     |     |     |     |     |     |     |     |     |     |     |     |     |     |     |     |     |     |     |     |     |     |     |     |     |     |     |     |     |     |     |     |     |     |     |     |     |     |     |     |     |     |     |     |     |     |     |     |     |     |     |     |     |     |     |     |     |     |     |     |     |     |     |     |     |     |     |     |     |     |     |     |     |     |     |     |     |     |     |     |     |     |     |     |     |     |     |     |     |     |     |     |     |     |     |     |     |     |     |     |     |     |     |     |     |     |     |     |     |     |     |     |     |     |     |     |     |     |     |     |     |     |     |     |     |     |     |     |     |     |     |     |     |     |     |     |     |     |     |     |     |     |     |     |     |     |     |     |     |     |     |     |     |     |     |     |     |     |     |     |     |     |     |     |     |     |     |     |     |     |     |     |     |     |     |     |     |     |     |     |     |     |     |     |     |     |     |     |     |     |     |     |     |     |     |     |     |     |     |     |     |     |     |     |     |     |     |     |     |     |     |     |     |     |     |     |     |     |     |     |     |     |     |     |     |     |     |     |     |     |     |     |     |     |     |     |     |     |     |     |     |     |     |     |     |     |     |     |     |     |     |     |     |     |     |     |     |     |     |     |     |     |     |     |     |     |     |     |     |     |     |     |     |     |     |     |     |     |     |     |     |     |     |     |     |     |     |     |     |     |     |     |     |     |     |     |     |     |     |     |     |     |     |     |     |     |     |     |     |     |     |     |     |     |     |     |     |     |     |     |     |     |     |     |     |     |     |     |     |     |     |     |     |     |     |     |     |     |     |     |     |     |     |     |     |     |     |     |     |     |     |     |     |     |     |     |     |     |     |     |     |     |     |     |     |     |     |     |     |     |     |     |     |     |     |     |     |     |     |     |     |     |     |     |     |     |     |     |     |     |     |     |     |     |     |     |     |     |     |     |     |     |     |     |     |     |     |     |     |     |     |     |     |     |     |     |     |     |     |     |     |     |     |     |     |     |     |     |     |     |     |     |     |     |     |     |     |     |     |     |     |     |     |     |     |     |     |     |     |     |     |     |     |     |     |     |     |     |     |     |     |     |     |     |     |     |     |     |     |     |     |     |     |     |     |     |     |     |     |     |     |     |     |     |     |     |     |     |     |     |     |     |     |     |     |     |     |     |     |     |     |     |     |     |     |     |     |     |     |     |     |     |     |     |     |     |     |     |     |     |     |     |     |     |     |     |     |     |     |     |     |     |     |     |     |     |     |     |     |     |     |     |     |     |     |     |     |     |     |     |     |     |     |     |     |     |     |     |     |
|                                  | MF423377/RJ95/BRA/2017   | Monkey                       | K V V R V I V R N P A T A R M A G V N A P K S V P K I I A V I T N A M I V A V S R A F A K D K Q P I A S N T A R V T M | L V I H A N K T R R E T V R I D T P S T I S K I A I A R T A K A S I V S K K D I M H L                                 |                                                                                                                       |                                                                                       |   |   |   |   |    |    |    |    |    |    |    |    |    |    |    |    |    |    |    |    |    |    |    |    |    |    |    |    |    |    |    |    |    |    |    |    |    |    |    |    |    |    |    |    |    |    |    |    |    |    |    |    |    |    |    |    |    |    |    |    |    |    |    |    |    |    |    |    |    |    |    |    |    |    |    |    |    |    |    |    |    |    |    |    |    |    |    |    |    |    |    |    |    |    |     |     |     |     |     |     |     |     |     |     |     |     |     |     |     |     |     |     |     |     |     |     |     |     |     |     |     |     |     |     |     |     |     |     |     |     |     |     |     |     |     |     |     |     |     |     |     |     |     |     |     |     |     |     |     |     |     |     |     |     |     |     |     |     |     |     |     |     |     |     |     |     |     |     |     |     |     |     |     |     |     |     |     |     |     |     |     |     |     |     |     |     |     |     |     |     |     |     |     |     |     |     |     |     |     |     |     |     |     |     |     |     |     |     |     |     |     |     |     |     |     |     |     |     |     |     |     |     |     |     |     |     |     |     |     |     |     |     |     |     |     |     |     |     |     |     |     |     |     |     |     |     |     |     |     |     |     |     |     |     |     |     |     |     |     |     |     |     |     |     |     |     |     |     |     |     |     |     |     |     |     |     |     |     |     |     |     |     |     |     |     |     |     |     |     |     |     |     |     |     |     |     |     |     |     |     |     |     |     |     |     |     |     |     |     |     |     |     |     |     |     |     |     |     |     |     |     |     |     |     |     |     |     |     |     |     |     |     |     |     |     |     |     |     |     |     |     |     |     |     |     |     |     |     |     |     |     |     |     |     |     |     |     |     |     |     |     |     |     |     |     |     |     |     |     |     |     |     |     |     |     |     |     |     |     |     |     |     |     |     |     |     |     |     |     |     |     |     |     |     |     |     |     |     |     |     |     |     |     |     |     |     |     |     |     |     |     |     |     |     |     |     |     |     |     |     |     |     |     |     |     |     |     |     |     |     |     |     |     |     |     |     |     |     |     |     |     |     |     |     |     |     |     |     |     |     |     |     |     |     |     |     |     |     |     |     |     |     |     |     |     |     |     |     |     |     |     |     |     |     |     |     |     |     |     |     |     |     |     |     |     |     |     |     |     |     |     |     |     |     |     |     |     |     |     |     |     |     |     |     |     |     |     |     |     |     |     |     |     |     |     |     |     |     |     |     |     |     |     |     |     |     |     |     |     |     |     |     |     |     |     |     |     |     |     |     |     |     |     |     |     |     |     |     |     |     |     |     |     |     |     |     |     |     |     |     |     |     |     |     |     |     |     |     |     |     |     |     |     |     |     |     |     |     |     |     |     |     |     |     |     |     |     |     |     |     |     |     |     |     |     |     |     |     |     |     |     |     |     |     |     |     |     |     |     |     |     |     |     |     |     |     |     |     |     |     |     |     |     |     |     |     |     |     |     |     |     |     |     |     |     |     |     |     |     |     |     |     |     |     |     |     |     |     |     |     |     |     |     |     |     |     |     |     |     |     |     |     |     |     |     |     |     |     |     |     |     |     |     |     |     |     |     |     |     |     |     |     |     |     |     |     |     |     |     |     |     |     |     |     |     |     |     |     |     |     |     |     |     |     |     |     |     |     |     |     |     |     |     |     |     |     |     |     |     |     |     |     |     |     |     |     |     |     |     |     |     |     |     |     |     |     |     |     |     |     |     |     |     |     |     |     |     |     |     |     |     |     |     |     |     |     |     |     |     |     |     |     |     |     |     |     |     |     |     |     |     |     |     |     |     |     |     |     |     |     |     |     |     |     |     |     |     |     |     |     |     |     |     |     |     |     |     |     |     |     |     |     |     |     |     |     |     |     |     |     |     |     |     |     |     |     |     |     |     |     |     |     |     |     |     |     |     |     |     |     |     |     |     |     |     |     |     |     |     |     |     |     |     |     |     |     |     |     |     |     |     |     |     |     |     |     |     |     |     |     |     |     |     |     |     |     |     |     |     |     |     |     |     |     |     |     |     |     |     |     |     |     |     |     |     |     |     |     |     |     |     |     |     |     |     |     |     |     |     |     |     |     |     |     |     |     |     |     |     |     |     |     |     |     |     |     |     |     |     |     |     |     |     |     |     |     |     |     |     |     |     |     |     |     |     |     |     |     |     |     |     |     |     |     |     |     |     |     |     |     |     |     |     |     |     |     |     |     |     |     |     |     |     |     |     |     |     |     |     |     |     |     |     |     |     |     |     |     |     |     |     |     |     |     |     |     |     |     |     |     |     |     |     |
|                                  | MF423378/RJ96/BRA/2017   | Monkey                       | K V V R V I V R N P A T A R M A G V N A P K S V P K I I A V I T N A M I V A V S R A F A K D K Q P I A S N T A R V T M | L V I H A N K T R R E T V R I D T P S T I S K I A I A R T A K A S I V S K K D I M H L                                 |                                                                                                                       |                                                                                       |   |   |   |   |    |    |    |    |    |    |    |    |    |    |    |    |    |    |    |    |    |    |    |    |    |    |    |    |    |    |    |    |    |    |    |    |    |    |    |    |    |    |    |    |    |    |    |    |    |    |    |    |    |    |    |    |    |    |    |    |    |    |    |    |    |    |    |    |    |    |    |    |    |    |    |    |    |    |    |    |    |    |    |    |    |    |    |    |    |    |    |    |    |    |     |     |     |     |     |     |     |     |     |     |     |     |     |     |     |     |     |     |     |     |     |     |     |     |     |     |     |     |     |     |     |     |     |     |     |     |     |     |     |     |     |     |     |     |     |     |     |     |     |     |     |     |     |     |     |     |     |     |     |     |     |     |     |     |     |     |     |     |     |     |     |     |     |     |     |     |     |     |     |     |     |     |     |     |     |     |     |     |     |     |     |     |     |     |     |     |     |     |     |     |     |     |     |     |     |     |     |     |     |     |     |     |     |     |     |     |     |     |     |     |     |     |     |     |     |     |     |     |     |     |     |     |     |     |     |     |     |     |     |     |     |     |     |     |     |     |     |     |     |     |     |     |     |     |     |     |     |     |     |     |     |     |     |     |     |     |     |     |     |     |     |     |     |     |     |     |     |     |     |     |     |     |     |     |     |     |     |     |     |     |     |     |     |     |     |     |     |     |     |     |     |     |     |     |     |     |     |     |     |     |     |     |     |     |     |     |     |     |     |     |     |     |     |     |     |     |     |     |     |     |     |     |     |     |     |     |     |     |     |     |     |     |     |     |     |     |     |     |     |     |     |     |     |     |     |     |     |     |     |     |     |     |     |     |     |     |     |     |     |     |     |     |     |     |     |     |     |     |     |     |     |     |     |     |     |     |     |     |     |     |     |     |     |     |     |     |     |     |     |     |     |     |     |     |     |     |     |     |     |     |     |     |     |     |     |     |     |     |     |     |     |     |     |     |     |     |     |     |     |     |     |     |     |     |     |     |     |     |     |     |     |     |     |     |     |     |     |     |     |     |     |     |     |     |     |     |     |     |     |     |     |     |     |     |     |     |     |     |     |     |     |     |     |     |     |     |     |     |     |     |     |     |     |     |     |     |     |     |     |     |     |     |     |     |     |     |     |     |     |     |     |     |     |     |     |     |     |     |     |     |     |     |     |     |     |     |     |     |     |     |     |     |     |     |     |     |     |     |     |     |     |     |     |     |     |     |     |     |     |     |     |     |     |     |     |     |     |     |     |     |     |     |     |     |     |     |     |     |     |     |     |     |     |     |     |     |     |     |     |     |     |     |     |     |     |     |     |     |     |     |     |     |     |     |     |     |     |     |     |     |     |     |     |     |     |     |     |     |     |     |     |     |     |     |     |     |     |     |     |     |     |     |     |     |     |     |     |     |     |     |     |     |     |     |     |     |     |     |     |     |     |     |     |     |     |     |     |     |     |     |     |     |     |     |     |     |     |     |     |     |     |     |     |     |     |     |     |     |     |     |     |     |     |     |     |     |     |     |     |     |     |     |     |     |     |     |     |     |     |     |     |     |     |     |     |     |     |     |     |     |     |     |     |     |     |     |     |     |     |     |     |     |     |     |     |     |     |     |     |     |     |     |     |     |     |     |     |     |     |     |     |     |     |     |     |     |     |     |     |     |     |     |     |     |     |     |     |     |     |     |     |     |     |     |     |     |     |     |     |     |     |     |     |     |     |     |     |     |     |     |     |     |     |     |     |     |     |     |     |     |     |     |     |     |     |     |     |     |     |     |     |     |     |     |     |     |     |     |     |     |     |     |     |     |     |     |     |     |     |     |     |     |     |     |     |     |     |     |     |     |     |     |     |     |     |     |     |     |     |     |     |     |     |     |     |     |     |     |     |     |     |     |     |     |     |     |     |     |     |     |     |     |     |     |     |     |     |     |     |     |     |     |     |     |     |     |     |     |     |     |     |     |     |     |     |     |     |     |     |     |     |     |     |     |     |     |     |     |     |     |     |     |     |     |     |     |     |     |     |     |     |     |     |     |     |     |     |     |     |     |     |     |     |     |     |     |     |     |     |     |     |     |     |     |     |     |     |     |     |     |     |     |     |     |     |     |     |     |     |     |     |     |     |     |     |     |     |     |     |     |     |     |     |     |     |     |     |     |     |     |     |     |     |     |     |     |     |     |     |     |     |     |     |     |     |     |     |     |     |     |     |     |     |     |     |     |     |     |     |     |     |     |     |     |     |     |     |     |     |     |     |     |     |     |     |     |     |     |     |
|                                  | MF538785/RJ97/BRA/2017   | Monkey                       | K V V R V I V R N P A T A R M A G V N A P K S V P K I I A V I T N A M I V A V S R A F A K D K Q P I A S N T A R V T M | L V I H A N K T R R E T V R I D T P S T I S K I A I A R T A K A S I V S K K D I M H L                                 |                                                                                                                       |                                                                                       |   |   |   |   |    |    |    |    |    |    |    |    |    |    |    |    |    |    |    |    |    |    |    |    |    |    |    |    |    |    |    |    |    |    |    |    |    |    |    |    |    |    |    |    |    |    |    |    |    |    |    |    |    |    |    |    |    |    |    |    |    |    |    |    |    |    |    |    |    |    |    |    |    |    |    |    |    |    |    |    |    |    |    |    |    |    |    |    |    |    |    |    |    |    |     |     |     |     |     |     |     |     |     |     |     |     |     |     |     |     |     |     |     |     |     |     |     |     |     |     |     |     |     |     |     |     |     |     |     |     |     |     |     |     |     |     |     |     |     |     |     |     |     |     |     |     |     |     |     |     |     |     |     |     |     |     |     |     |     |     |     |     |     |     |     |     |     |     |     |     |     |     |     |     |     |     |     |     |     |     |     |     |     |     |     |     |     |     |     |     |     |     |     |     |     |     |     |     |     |     |     |     |     |     |     |     |     |     |     |     |     |     |     |     |     |     |     |     |     |     |     |     |     |     |     |     |     |     |     |     |     |     |     |     |     |     |     |     |     |     |     |     |     |     |     |     |     |     |     |     |     |     |     |     |     |     |     |     |     |     |     |     |     |     |     |     |     |     |     |     |     |     |     |     |     |     |     |     |     |     |     |     |     |     |     |     |     |     |     |     |     |     |     |     |     |     |     |     |     |     |     |     |     |     |     |     |     |     |     |     |     |     |     |     |     |     |     |     |     |     |     |     |     |     |     |     |     |     |     |     |     |     |     |     |     |     |     |     |     |     |     |     |     |     |     |     |     |     |     |     |     |     |     |     |     |     |     |     |     |     |     |     |     |     |     |     |     |     |     |     |     |     |     |     |     |     |     |     |     |     |     |     |     |     |     |     |     |     |     |     |     |     |     |     |     |     |     |     |     |     |     |     |     |     |     |     |     |     |     |     |     |     |     |     |     |     |     |     |     |     |     |     |     |     |     |     |     |     |     |     |     |     |     |     |     |     |     |     |     |     |     |     |     |     |     |     |     |     |     |     |     |     |     |     |     |     |     |     |     |     |     |     |     |     |     |     |     |     |     |     |     |     |     |     |     |     |     |     |     |     |     |     |     |     |     |     |     |     |     |     |     |     |     |     |     |     |     |     |     |     |     |     |     |     |     |     |     |     |     |     |     |     |     |     |     |     |     |     |     |     |     |     |     |     |     |     |     |     |     |     |     |     |     |     |     |     |     |     |     |     |     |     |     |     |     |     |     |     |     |     |     |     |     |     |     |     |     |     |     |     |     |     |     |     |     |     |     |     |     |     |     |     |     |     |     |     |     |     |     |     |     |     |     |     |     |     |     |     |     |     |     |     |     |     |     |     |     |     |     |     |     |     |     |     |     |     |     |     |     |     |     |     |     |     |     |     |     |     |     |     |     |     |     |     |     |     |     |     |     |     |     |     |     |     |     |     |     |     |     |     |     |     |     |     |     |     |     |     |     |     |     |     |     |     |     |     |     |     |     |     |     |     |     |     |     |     |     |     |     |     |     |     |     |     |     |     |     |     |     |     |     |     |     |     |     |     |     |     |     |     |     |     |     |     |     |     |     |     |     |     |     |     |     |     |     |     |     |     |     |     |     |     |     |     |     |     |     |     |     |     |     |     |     |     |     |     |     |     |     |     |     |     |     |     |     |     |     |     |     |     |     |     |     |     |     |     |     |     |     |     |     |     |     |     |     |     |     |     |     |     |     |     |     |     |     |     |     |     |     |     |     |     |     |     |     |     |     |     |     |     |     |     |     |     |     |     |     |     |     |     |     |     |     |     |     |     |     |     |     |     |     |     |     |     |     |     |     |     |     |     |     |     |     |     |     |     |     |     |     |     |     |     |     |     |     |     |     |     |     |     |     |     |     |     |     |     |     |     |     |     |     |     |     |     |     |     |     |     |     |     |     |     |     |     |     |     |     |     |     |     |     |     |     |     |     |     |     |     |     |     |     |     |     |     |     |     |     |     |     |     |     |     |     |     |     |     |     |     |     |     |     |     |     |     |     |     |     |     |     |     |     |     |     |     |     |     |     |     |     |     |     |     |     |     |     |     |     |     |     |     |     |     |     |     |     |     |     |     |     |     |     |     |     |     |     |     |     |     |     |     |     |     |     |     |     |     |     |     |     |     |     |     |     |     |     |     |     |     |     |     |     |     |     |     |     |     |     |     |     |     |     |     |     |     |     |     |     |     |     |     |     |     |     |     |     |     |     |     |     |     |     |     |     |
|                                  | MF538786/RJ104/BRA/2017  | Monkey                       | K V V R V I V R N P A T A R M A G V N A P K S V P K I I A V I T N A M I V A V S R A F A K D K Q P I A S N T A R V T M | L I I H A N K T R R E T V R I D T P S T I S K I A I A R T A K A S I V S K K D I M H L                                 |                                                                                                                       |                                                                                       |   |   |   |   |    |    |    |    |    |    |    |    |    |    |    |    |    |    |    |    |    |    |    |    |    |    |    |    |    |    |    |    |    |    |    |    |    |    |    |    |    |    |    |    |    |    |    |    |    |    |    |    |    |    |    |    |    |    |    |    |    |    |    |    |    |    |    |    |    |    |    |    |    |    |    |    |    |    |    |    |    |    |    |    |    |    |    |    |    |    |    |    |    |    |     |     |     |     |     |     |     |     |     |     |     |     |     |     |     |     |     |     |     |     |     |     |     |     |     |     |     |     |     |     |     |     |     |     |     |     |     |     |     |     |     |     |     |     |     |     |     |     |     |     |     |     |     |     |     |     |     |     |     |     |     |     |     |     |     |     |     |     |     |     |     |     |     |     |     |     |     |     |     |     |     |     |     |     |     |     |     |     |     |     |     |     |     |     |     |     |     |     |     |     |     |     |     |     |     |     |     |     |     |     |     |     |     |     |     |     |     |     |     |     |     |     |     |     |     |     |     |     |     |     |     |     |     |     |     |     |     |     |     |     |     |     |     |     |     |     |     |     |     |     |     |     |     |     |     |     |     |     |     |     |     |     |     |     |     |     |     |     |     |     |     |     |     |     |     |     |     |     |     |     |     |     |     |     |     |     |     |     |     |     |     |     |     |     |     |     |     |     |     |     |     |     |     |     |     |     |     |     |     |     |     |     |     |     |     |     |     |     |     |     |     |     |     |     |     |     |     |     |     |     |     |     |     |     |     |     |     |     |     |     |     |     |     |     |     |     |     |     |     |     |     |     |     |     |     |     |     |     |     |     |     |     |     |     |     |     |     |     |     |     |     |     |     |     |     |     |     |     |     |     |     |     |     |     |     |     |     |     |     |     |     |     |     |     |     |     |     |     |     |     |     |     |     |     |     |     |     |     |     |     |     |     |     |     |     |     |     |     |     |     |     |     |     |     |     |     |     |     |     |     |     |     |     |     |     |     |     |     |     |     |     |     |     |     |     |     |     |     |     |     |     |     |     |     |     |     |     |     |     |     |     |     |     |     |     |     |     |     |     |     |     |     |     |     |     |     |     |     |     |     |     |     |     |     |     |     |     |     |     |     |     |     |     |     |     |     |     |     |     |     |     |     |     |     |     |     |     |     |     |     |     |     |     |     |     |     |     |     |     |     |     |     |     |     |     |     |     |     |     |     |     |     |     |     |     |     |     |     |     |     |     |     |     |     |     |     |     |     |     |     |     |     |     |     |     |     |     |     |     |     |     |     |     |     |     |     |     |     |     |     |     |     |     |     |     |     |     |     |     |     |     |     |     |     |     |     |     |     |     |     |     |     |     |     |     |     |     |     |     |     |     |     |     |     |     |     |     |     |     |     |     |     |     |     |     |     |     |     |     |     |     |     |     |     |     |     |     |     |     |     |     |     |     |     |     |     |     |     |     |     |     |     |     |     |     |     |     |     |     |     |     |     |     |     |     |     |     |     |     |     |     |     |     |     |     |     |     |     |     |     |     |     |     |     |     |     |     |     |     |     |     |     |     |     |     |     |     |     |     |     |     |     |     |     |     |     |     |     |     |     |     |     |     |     |     |     |     |     |     |     |     |     |     |     |     |     |     |     |     |     |     |     |     |     |     |     |     |     |     |     |     |     |     |     |     |     |     |     |     |     |     |     |     |     |     |     |     |     |     |     |     |     |     |     |     |     |     |     |     |     |     |     |     |     |     |     |     |     |     |     |     |     |     |     |     |     |     |     |     |     |     |     |     |     |     |     |     |     |     |     |     |     |     |     |     |     |     |     |     |     |     |     |     |     |     |     |     |     |     |     |     |     |     |     |     |     |     |     |     |     |     |     |     |     |     |     |     |     |     |     |     |     |     |     |     |     |     |     |     |     |     |     |     |     |     |     |     |     |     |     |     |     |     |     |     |     |     |     |     |     |     |     |     |     |     |     |     |     |     |     |     |     |     |     |     |     |     |     |     |     |     |     |     |     |     |     |     |     |     |     |     |     |     |     |     |     |     |     |     |     |     |     |     |     |     |     |     |     |     |     |     |     |     |     |     |     |     |     |     |     |     |     |     |     |     |     |     |     |     |     |     |     |     |     |     |     |     |     |     |     |     |     |     |     |     |     |     |     |     |     |     |     |     |     |     |     |     |     |     |     |     |     |     |     |     |     |     |     |     |     |     |     |     |     |     |     |     |     |     |     |     |     |     |     |     |     |     |     |     |     |     |     |     |     |     |     |     |     |     |
|                                  | MF423373/PA193/BRA/2017  | Mosquito                     | K V V R V I V R N P A T A R M A G V N A P K S V P K I I A V I T N A M I V A V S R A F A K D K Q P I A S N T A R V T M | L V I H A N K T R R E T V R I D T P S T I S K I A I A R T A K A S I V S K K D I M H L                                 |                                                                                                                       |                                                                                       |   |   |   |   |    |    |    |    |    |    |    |    |    |    |    |    |    |    |    |    |    |    |    |    |    |    |    |    |    |    |    |    |    |    |    |    |    |    |    |    |    |    |    |    |    |    |    |    |    |    |    |    |    |    |    |    |    |    |    |    |    |    |    |    |    |    |    |    |    |    |    |    |    |    |    |    |    |    |    |    |    |    |    |    |    |    |    |    |    |    |    |    |    |    |     |     |     |     |     |     |     |     |     |     |     |     |     |     |     |     |     |     |     |     |     |     |     |     |     |     |     |     |     |     |     |     |     |     |     |     |     |     |     |     |     |     |     |     |     |     |     |     |     |     |     |     |     |     |     |     |     |     |     |     |     |     |     |     |     |     |     |     |     |     |     |     |     |     |     |     |     |     |     |     |     |     |     |     |     |     |     |     |     |     |     |     |     |     |     |     |     |     |     |     |     |     |     |     |     |     |     |     |     |     |     |     |     |     |     |     |     |     |     |     |     |     |     |     |     |     |     |     |     |     |     |     |     |     |     |     |     |     |     |     |     |     |     |     |     |     |     |     |     |     |     |     |     |     |     |     |     |     |     |     |     |     |     |     |     |     |     |     |     |     |     |     |     |     |     |     |     |     |     |     |     |     |     |     |     |     |     |     |     |     |     |     |     |     |     |     |     |     |     |     |     |     |     |     |     |     |     |     |     |     |     |     |     |     |     |     |     |     |     |     |     |     |     |     |     |     |     |     |     |     |     |     |     |     |     |     |     |     |     |     |     |     |     |     |     |     |     |     |     |     |     |     |     |     |     |     |     |     |     |     |     |     |     |     |     |     |     |     |     |     |     |     |     |     |     |     |     |     |     |     |     |     |     |     |     |     |     |     |     |     |     |     |     |     |     |     |     |     |     |     |     |     |     |     |     |     |     |     |     |     |     |     |     |     |     |     |     |     |     |     |     |     |     |     |     |     |     |     |     |     |     |     |     |     |     |     |     |     |     |     |     |     |     |     |     |     |     |     |     |     |     |     |     |     |     |     |     |     |     |     |     |     |     |     |     |     |     |     |     |     |     |     |     |     |     |     |     |     |     |     |     |     |     |     |     |     |     |     |     |     |     |     |     |     |     |     |     |     |     |     |     |     |     |     |     |     |     |     |     |     |     |     |     |     |     |     |     |     |     |     |     |     |     |     |     |     |     |     |     |     |     |     |     |     |     |     |     |     |     |     |     |     |     |     |     |     |     |     |     |     |     |     |     |     |     |     |     |     |     |     |     |     |     |     |     |     |     |     |     |     |     |     |     |     |     |     |     |     |     |     |     |     |     |     |     |     |     |     |     |     |     |     |     |     |     |     |     |     |     |     |     |     |     |     |     |     |     |     |     |     |     |     |     |     |     |     |     |     |     |     |     |     |     |     |     |     |     |     |     |     |     |     |     |     |     |     |     |     |     |     |     |     |     |     |     |     |     |     |     |     |     |     |     |     |     |     |     |     |     |     |     |     |     |     |     |     |     |     |     |     |     |     |     |     |     |     |     |     |     |     |     |     |     |     |     |     |     |     |     |     |     |     |     |     |     |     |     |     |     |     |     |     |     |     |     |     |     |     |     |     |     |     |     |     |     |     |     |     |     |     |     |     |     |     |     |     |     |     |     |     |     |     |     |     |     |     |     |     |     |     |     |     |     |     |     |     |     |     |     |     |     |     |     |     |     |     |     |     |     |     |     |     |     |     |     |     |     |     |     |     |     |     |     |     |     |     |     |     |     |     |     |     |     |     |     |     |     |     |     |     |     |     |     |     |     |     |     |     |     |     |     |     |     |     |     |     |     |     |     |     |     |     |     |     |     |     |     |     |     |     |     |     |     |     |     |     |     |     |     |     |     |     |     |     |     |     |     |     |     |     |     |     |     |     |     |     |     |     |     |     |     |     |     |     |     |     |     |     |     |     |     |     |     |     |     |     |     |     |     |     |     |     |     |     |     |     |     |     |     |     |     |     |     |     |     |     |     |     |     |     |     |     |     |     |     |     |     |     |     |     |     |     |     |     |     |     |     |     |     |     |     |     |     |     |     |     |     |     |     |     |     |     |     |     |     |     |     |     |     |     |     |     |     |     |     |     |     |     |     |     |     |     |     |     |     |     |     |     |     |     |     |     |     |     |     |     |     |     |     |     |     |     |     |     |     |     |     |     |     |     |     |     |     |     |     |     |     |     |     |     |     |     |     |     |     |     |     |     |     |     |     |     |     |     |     |     |     |     |     |
|                                  | MF423374/PA196/BRA/2017  | Mosquito                     | K V V R V I V R N P A T A R M A G V N A P K S V P K I I A V I T N A M I V A V S R A F A K D K Q P I A S N T A R V T M | L I I H A N K T R R E T V R I D T P S T I S K I A I A R T A K A S I V S K K D I M H L                                 |                                                                                                                       |                                                                                       |   |   |   |   |    |    |    |    |    |    |    |    |    |    |    |    |    |    |    |    |    |    |    |    |    |    |    |    |    |    |    |    |    |    |    |    |    |    |    |    |    |    |    |    |    |    |    |    |    |    |    |    |    |    |    |    |    |    |    |    |    |    |    |    |    |    |    |    |    |    |    |    |    |    |    |    |    |    |    |    |    |    |    |    |    |    |    |    |    |    |    |    |    |    |     |     |     |     |     |     |     |     |     |     |     |     |     |     |     |     |     |     |     |     |     |     |     |     |     |     |     |     |     |     |     |     |     |     |     |     |     |     |     |     |     |     |     |     |     |     |     |     |     |     |     |     |     |     |     |     |     |     |     |     |     |     |     |     |     |     |     |     |     |     |     |     |     |     |     |     |     |     |     |     |     |     |     |     |     |     |     |     |     |     |     |     |     |     |     |     |     |     |     |     |     |     |     |     |     |     |     |     |     |     |     |     |     |     |     |     |     |     |     |     |     |     |     |     |     |     |     |     |     |     |     |     |     |     |     |     |     |     |     |     |     |     |     |     |     |     |     |     |     |     |     |     |     |     |     |     |     |     |     |     |     |     |     |     |     |     |     |     |     |     |     |     |     |     |     |     |     |     |     |     |     |     |     |     |     |     |     |     |     |     |     |     |     |     |     |     |     |     |     |     |     |     |     |     |     |     |     |     |     |     |     |     |     |     |     |     |     |     |     |     |     |     |     |     |     |     |     |     |     |     |     |     |     |     |     |     |     |     |     |     |     |     |     |     |     |     |     |     |     |     |     |     |     |     |     |     |     |     |     |     |     |     |     |     |     |     |     |     |     |     |     |     |     |     |     |     |     |     |     |     |     |     |     |     |     |     |     |     |     |     |     |     |     |     |     |     |     |     |     |     |     |     |     |     |     |     |     |     |     |     |     |     |     |     |     |     |     |     |     |     |     |     |     |     |     |     |     |     |     |     |     |     |     |     |     |     |     |     |     |     |     |     |     |     |     |     |     |     |     |     |     |     |     |     |     |     |     |     |     |     |     |     |     |     |     |     |     |     |     |     |     |     |     |     |     |     |     |     |     |     |     |     |     |     |     |     |     |     |     |     |     |     |     |     |     |     |     |     |     |     |     |     |     |     |     |     |     |     |     |     |     |     |     |     |     |     |     |     |     |     |     |     |     |     |     |     |     |     |     |     |     |     |     |     |     |     |     |     |     |     |     |     |     |     |     |     |     |     |     |     |     |     |     |     |     |     |     |     |     |     |     |     |     |     |     |     |     |     |     |     |     |     |     |     |     |     |     |     |     |     |     |     |     |     |     |     |     |     |     |     |     |     |     |     |     |     |     |     |     |     |     |     |     |     |     |     |     |     |     |     |     |     |     |     |     |     |     |     |     |     |     |     |     |     |     |     |     |     |     |     |     |     |     |     |     |     |     |     |     |     |     |     |     |     |     |     |     |     |     |     |     |     |     |     |     |     |     |     |     |     |     |     |     |     |     |     |     |     |     |     |     |     |     |     |     |     |     |     |     |     |     |     |     |     |     |     |     |     |     |     |     |     |     |     |     |     |     |     |     |     |     |     |     |     |     |     |     |     |     |     |     |     |     |     |     |     |     |     |     |     |     |     |     |     |     |     |     |     |     |     |     |     |     |     |     |     |     |     |     |     |     |     |     |     |     |     |     |     |     |     |     |     |     |     |     |     |     |     |     |     |     |     |     |     |     |     |     |     |     |     |     |     |     |     |     |     |     |     |     |     |     |     |     |     |     |     |     |     |     |     |     |     |     |     |     |     |     |     |     |     |     |     |     |     |     |     |     |     |     |     |     |     |     |     |     |     |     |     |     |     |     |     |     |     |     |     |     |     |     |     |     |     |     |     |     |     |     |     |     |     |     |     |     |     |     |     |     |     |     |     |     |     |     |     |     |     |     |     |     |     |     |     |     |     |     |     |     |     |     |     |     |     |     |     |     |     |     |     |     |     |     |     |     |     |     |     |     |     |     |     |     |     |     |     |     |     |     |     |     |     |     |     |     |     |     |     |     |     |     |     |     |     |     |     |     |     |     |     |     |     |     |     |     |     |     |     |     |     |     |     |     |     |     |     |     |     |     |     |     |     |     |     |     |     |     |     |     |     |     |     |     |     |     |     |     |     |     |     |     |     |     |     |     |     |     |     |     |     |     |     |     |     |     |     |     |     |     |     |     |     |     |     |     |     |     |     |     |     |     |     |     |     |     |     |     |     |     |     |     |
| TT</                             |                          |                              |                                                                                                                       |                                                                                                                       |                                                                                                                       |                                                                                       |   |   |   |   |    |    |    |    |    |    |    |    |    |    |    |    |    |    |    |    |    |    |    |    |    |    |    |    |    |    |    |    |    |    |    |    |    |    |    |    |    |    |    |    |    |    |    |    |    |    |    |    |    |    |    |    |    |    |    |    |    |    |    |    |    |    |    |    |    |    |    |    |    |    |    |    |    |    |    |    |    |    |    |    |    |    |    |    |    |    |    |    |    |    |     |     |     |     |     |     |     |     |     |     |     |     |     |     |     |     |     |     |     |     |     |     |     |     |     |     |     |     |     |     |     |     |     |     |     |     |     |     |     |     |     |     |     |     |     |     |     |     |     |     |     |     |     |     |     |     |     |     |     |     |     |     |     |     |     |     |     |     |     |     |     |     |     |     |     |     |     |     |     |     |     |     |     |     |     |     |     |     |     |     |     |     |     |     |     |     |     |     |     |     |     |     |     |     |     |     |     |     |     |     |     |     |     |     |     |     |     |     |     |     |     |     |     |     |     |     |     |     |     |     |     |     |     |     |     |     |     |     |     |     |     |     |     |     |     |     |     |     |     |     |     |     |     |     |     |     |     |     |     |     |     |     |     |     |     |     |     |     |     |     |     |     |     |     |     |     |     |     |     |     |     |     |     |     |     |     |     |     |     |     |     |     |     |     |     |     |     |     |     |     |     |     |     |     |     |     |     |     |     |     |     |     |     |     |     |     |     |     |     |     |     |     |     |     |     |     |     |     |     |     |     |     |     |     |     |     |     |     |     |     |     |     |     |     |     |     |     |     |     |     |     |     |     |     |     |     |     |     |     |     |     |     |     |     |     |     |     |     |     |     |     |     |     |     |     |     |     |     |     |     |     |     |     |     |     |     |     |     |     |     |     |     |     |     |     |     |     |     |     |     |     |     |     |     |     |     |     |     |     |     |     |     |     |     |     |     |     |     |     |     |     |     |     |     |     |     |     |     |     |     |     |     |     |     |     |     |     |     |     |     |     |     |     |     |     |     |     |     |     |     |     |     |     |     |     |     |     |     |     |     |     |     |     |     |     |     |     |     |     |     |     |     |     |     |     |     |     |     |     |     |     |     |     |     |     |     |     |     |     |     |     |     |     |     |     |     |     |     |     |     |     |     |     |     |     |     |     |     |     |     |     |     |     |     |     |     |     |     |     |     |     |     |     |     |     |     |     |     |     |     |     |     |     |     |     |     |     |     |     |     |     |     |     |     |     |     |     |     |     |     |     |     |     |     |     |     |     |     |     |     |     |     |     |     |     |     |     |     |     |     |     |     |     |     |     |     |     |     |     |     |     |     |     |     |     |     |     |     |     |     |     |     |     |     |     |     |     |     |     |     |     |     |     |     |     |     |     |     |     |     |     |     |     |     |     |     |     |     |     |     |     |     |     |     |     |     |     |     |     |     |     |     |     |     |     |     |     |     |     |     |     |     |     |     |     |     |     |     |     |     |     |     |     |     |     |     |     |     |     |     |     |     |     |     |     |     |     |     |     |     |     |     |     |     |     |     |     |     |     |     |     |     |     |     |     |     |     |     |     |     |     |     |     |     |     |     |     |     |     |     |     |     |     |     |     |     |     |     |     |     |     |     |     |     |     |     |     |     |     |     |     |     |     |     |     |     |     |     |     |     |     |     |     |     |     |     |     |     |     |     |     |     |     |     |     |     |     |     |     |     |     |     |     |     |     |     |     |     |     |     |     |     |     |     |     |     |     |     |     |     |     |     |     |     |     |     |     |     |     |     |     |     |     |     |     |     |     |     |     |     |     |     |     |     |     |     |     |     |     |     |     |     |     |     |     |     |     |     |     |     |     |     |     |     |     |     |     |     |     |     |     |     |     |     |     |     |     |     |     |     |     |     |     |     |     |     |     |     |     |     |     |     |     |     |     |     |     |     |     |     |     |     |     |     |     |     |     |     |     |     |     |     |     |     |     |     |     |     |     |     |     |     |     |     |     |     |     |     |     |     |     |     |     |     |     |     |     |     |     |     |     |     |     |     |     |     |     |     |     |     |     |     |     |     |     |     |     |     |     |     |     |     |     |     |     |     |     |     |     |     |     |     |     |     |     |     |     |     |     |     |     |     |     |     |     |     |     |     |     |     |     |     |     |     |     |     |     |     |     |     |     |     |     |     |     |     |     |     |     |     |     |     |     |     |     |     |     |     |     |     |     |     |     |     |     |     |     |     |     |     |     |     |     |     |     |     |     |     |     |     |     |     |     |     |     |     |     |     |     |

### YFV 2010

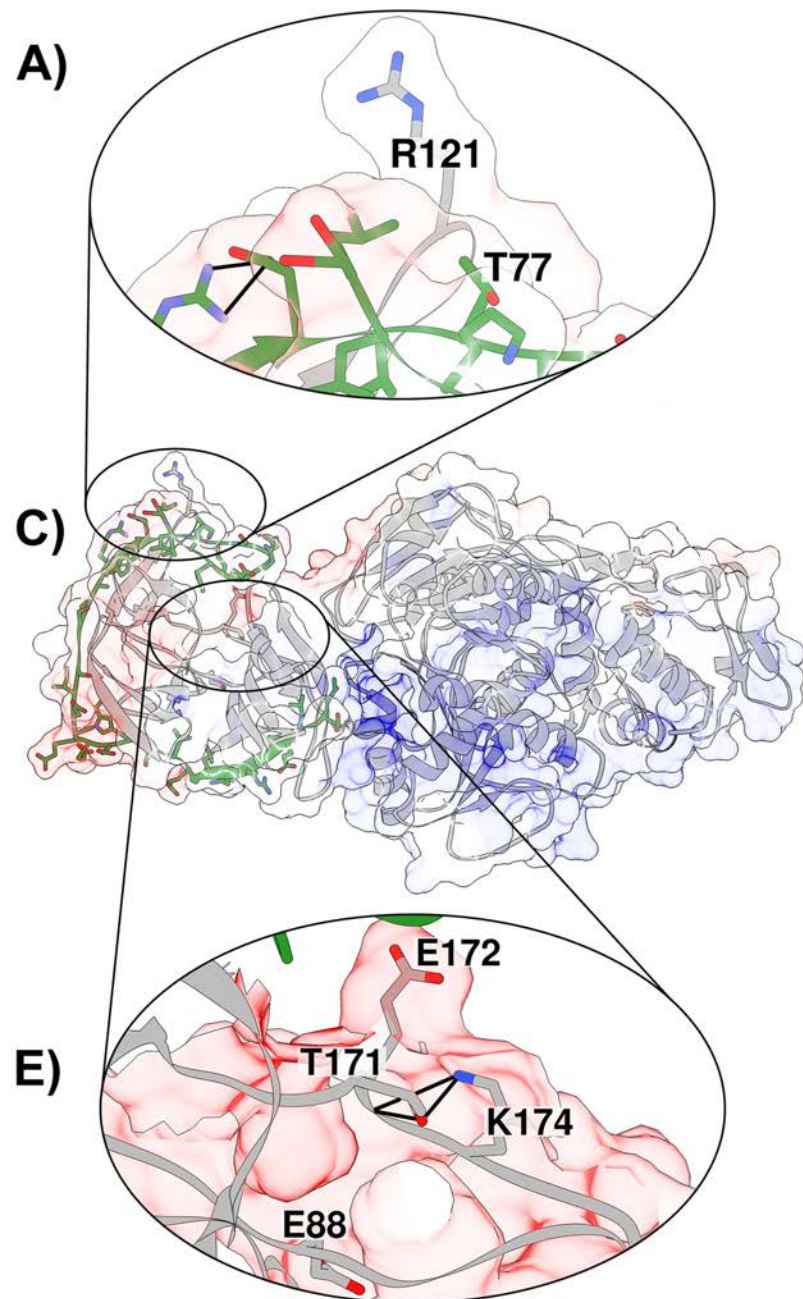

### YFV 2017

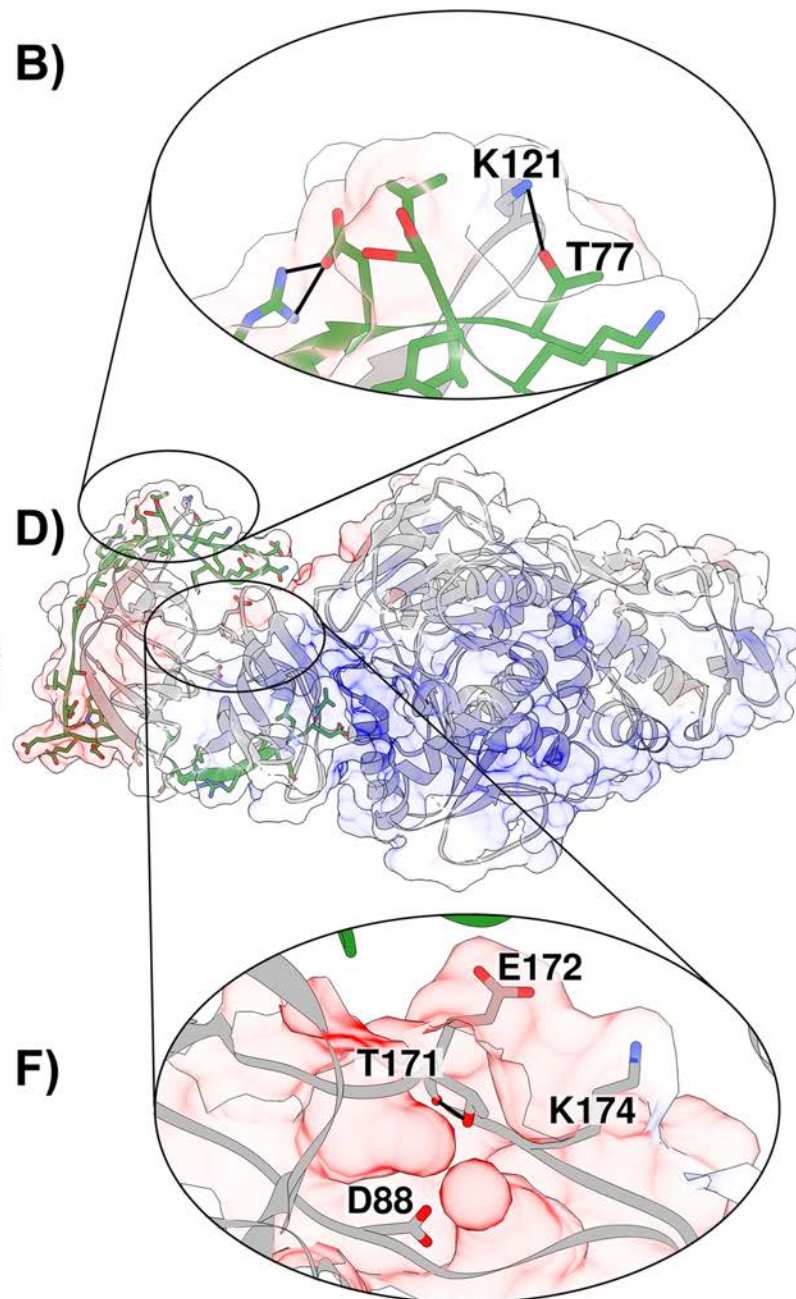

# YFV 2010

# YFV 2017

A)

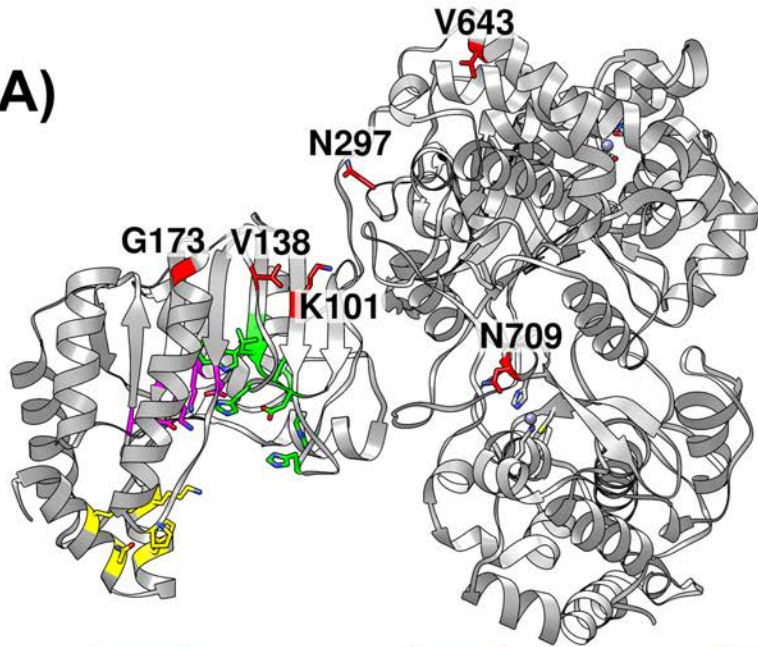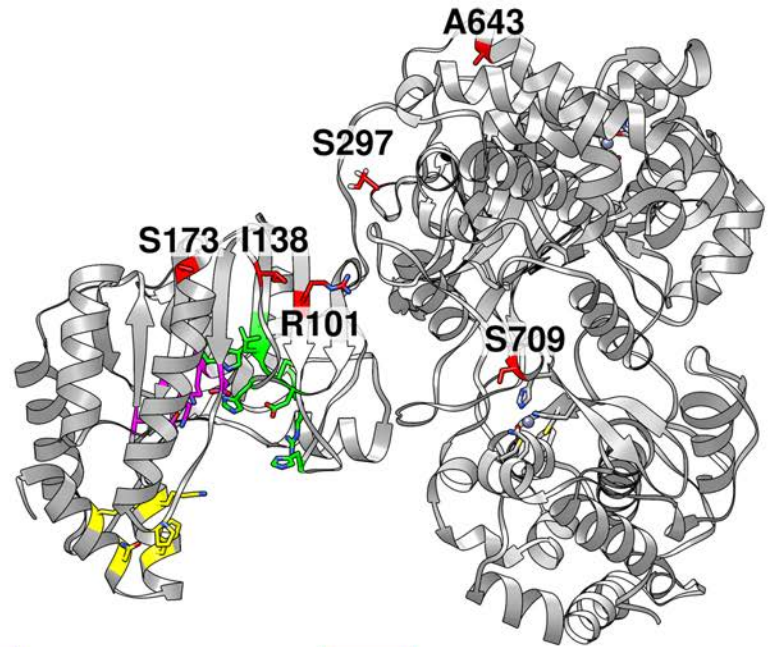

■ Mutations    ■ Active site    ■ GTP binding site    ■ SAM binding site

B)

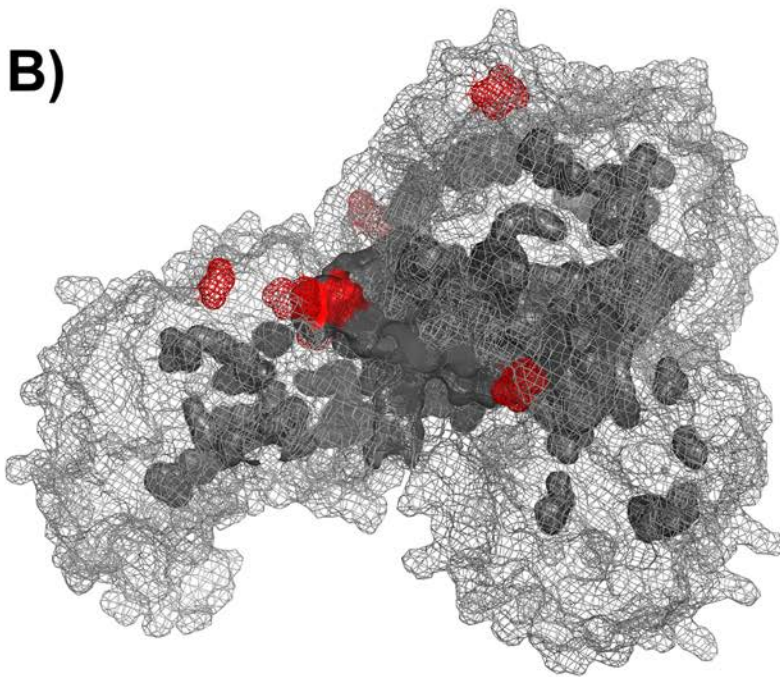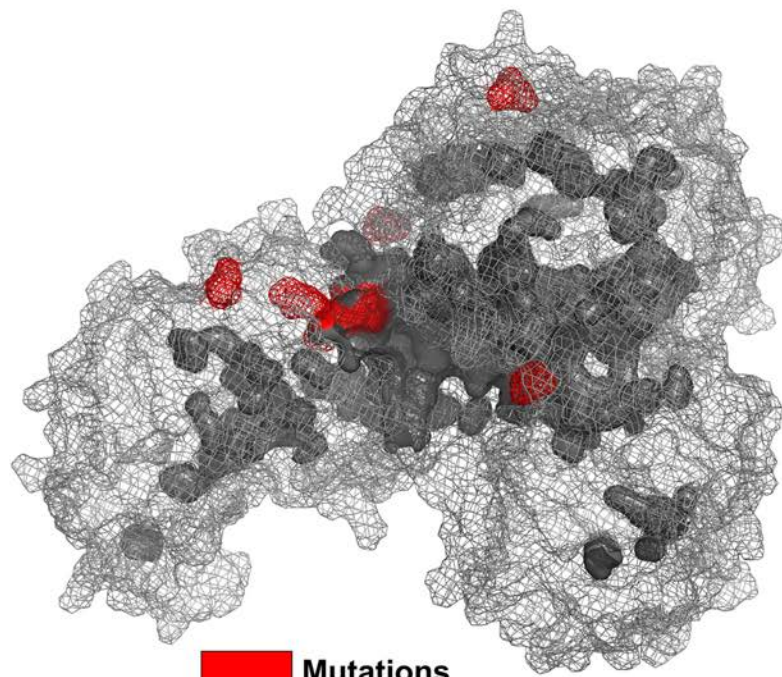

■ Mutations



# SOUTH AMERICA-I

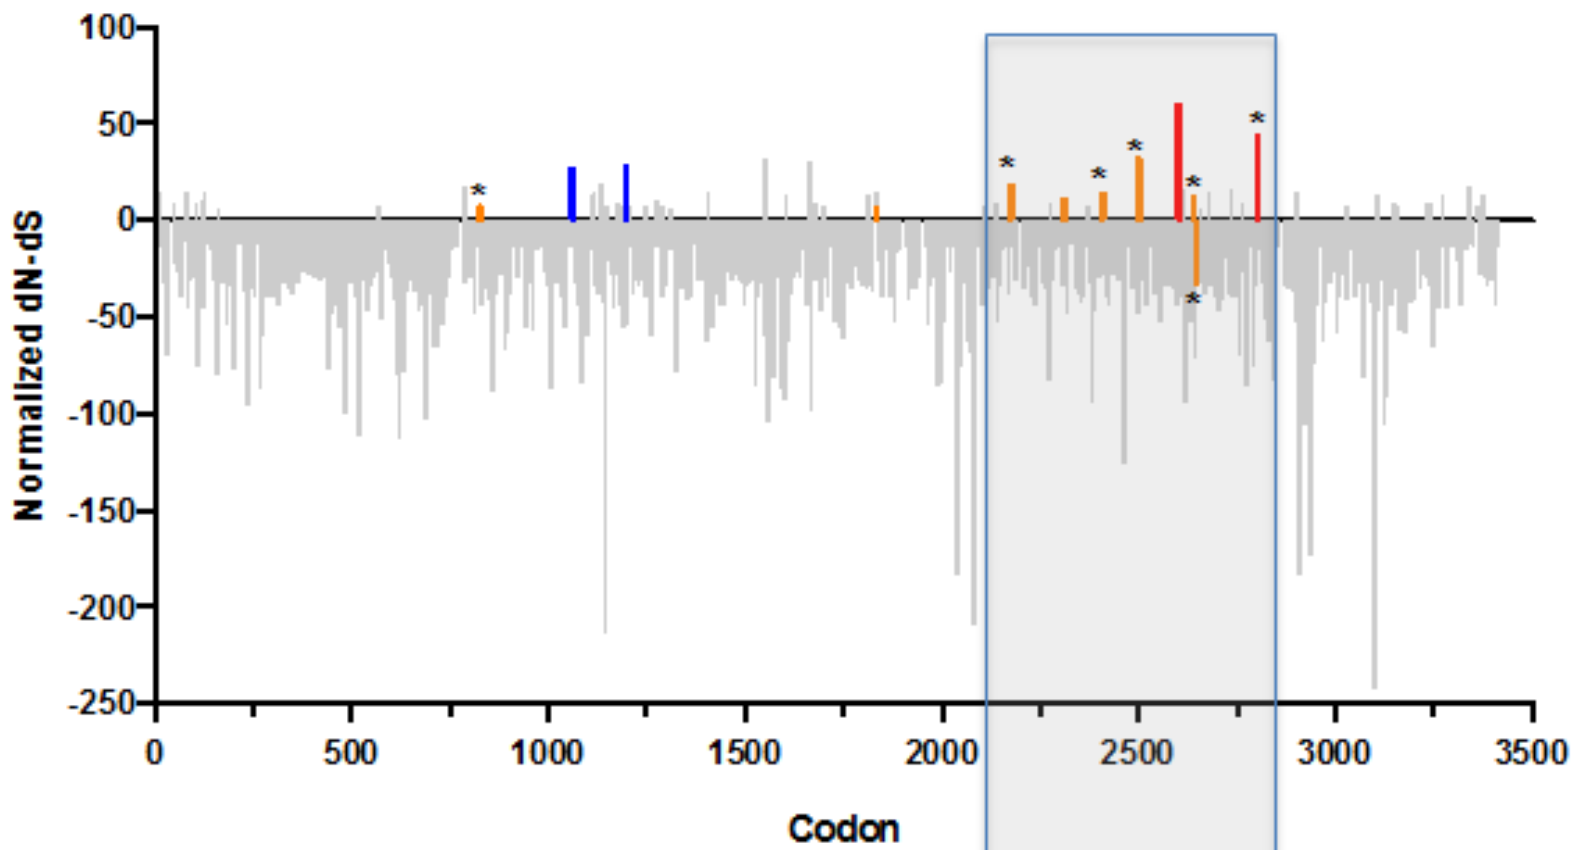

# WEST AFRICA

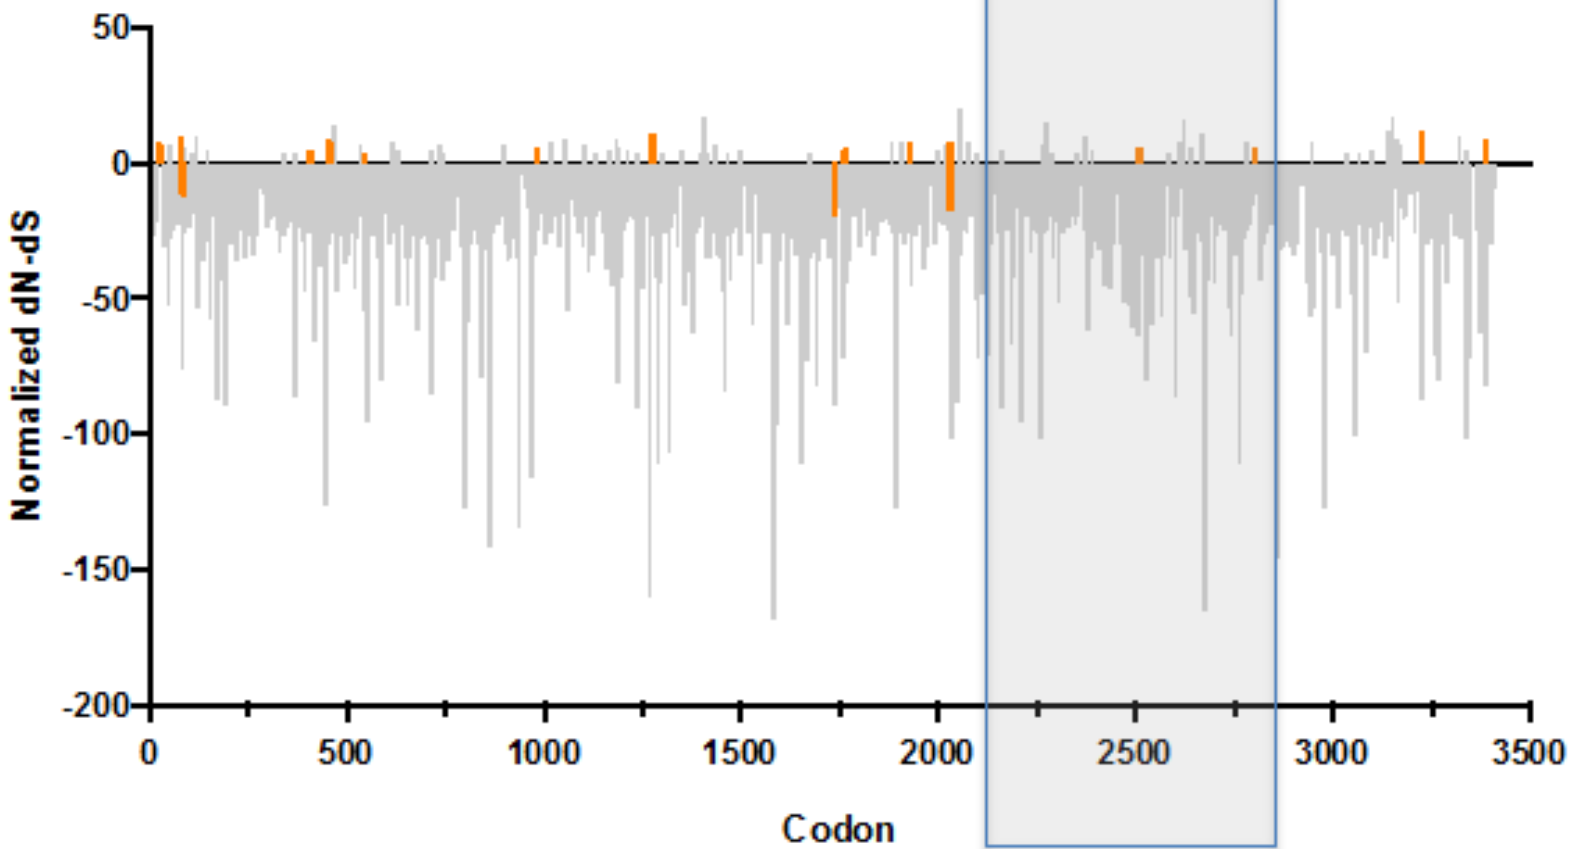

MEME FEL MEME/FEL/FUBAR

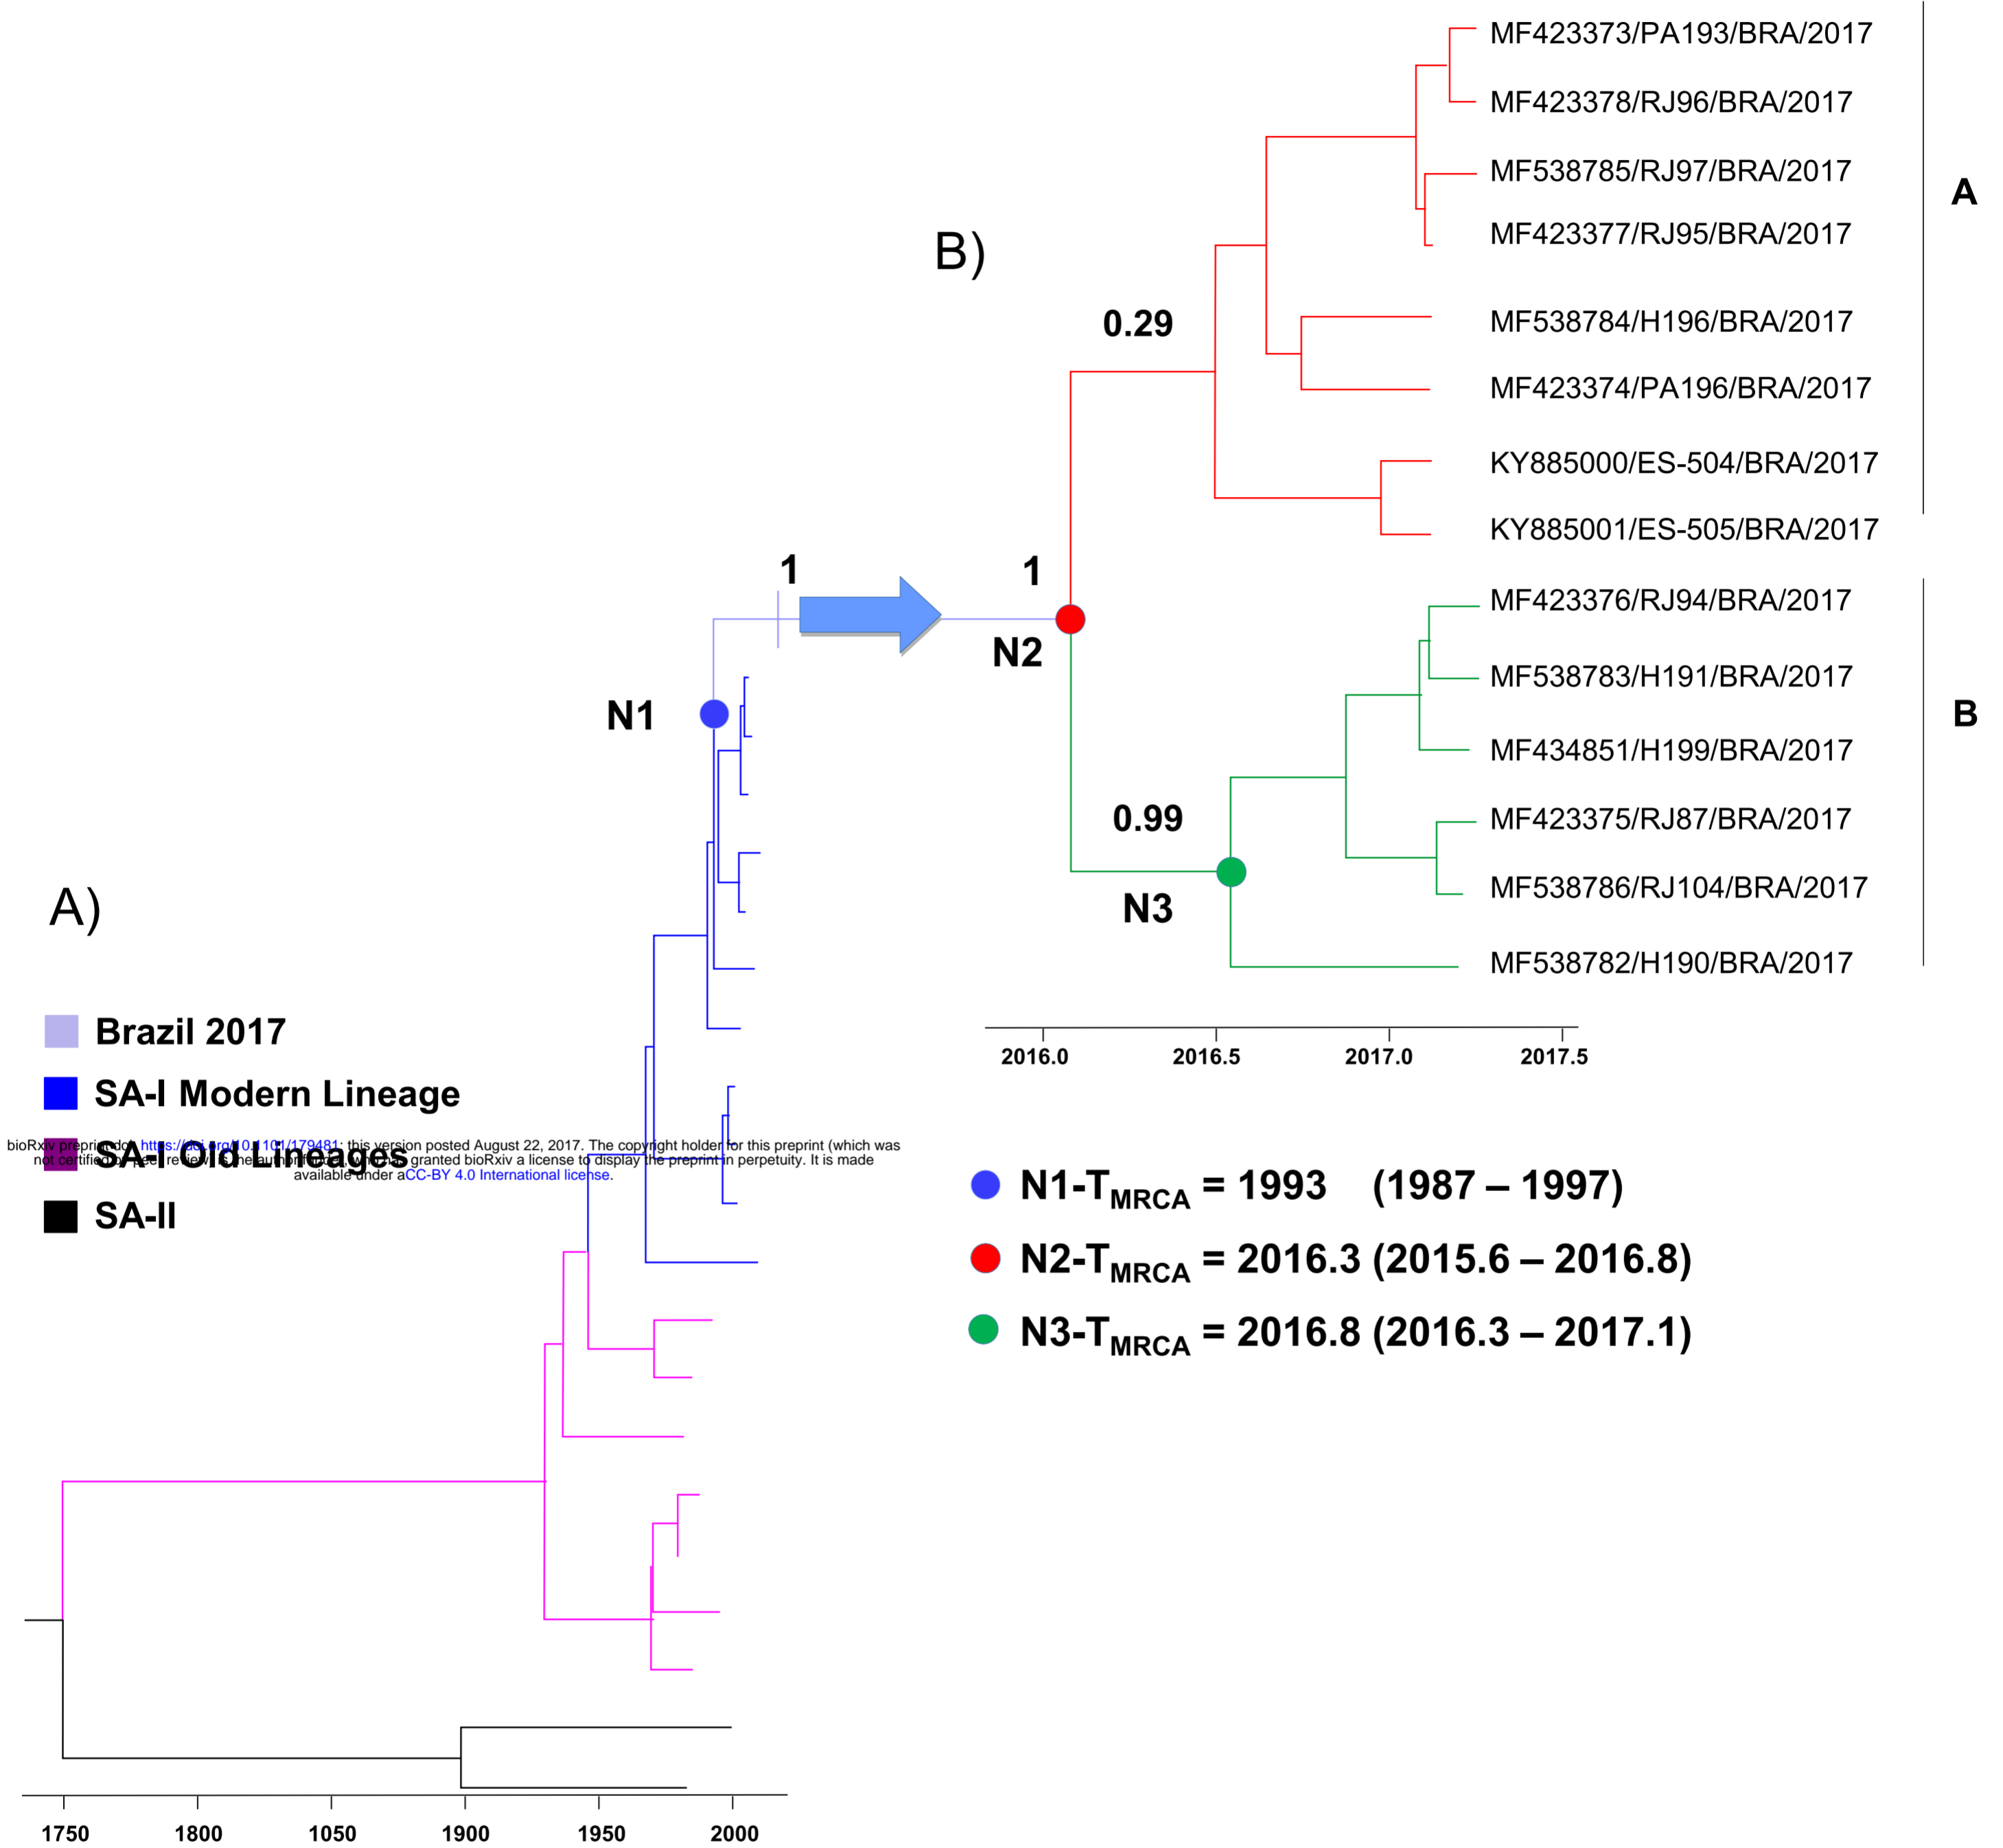

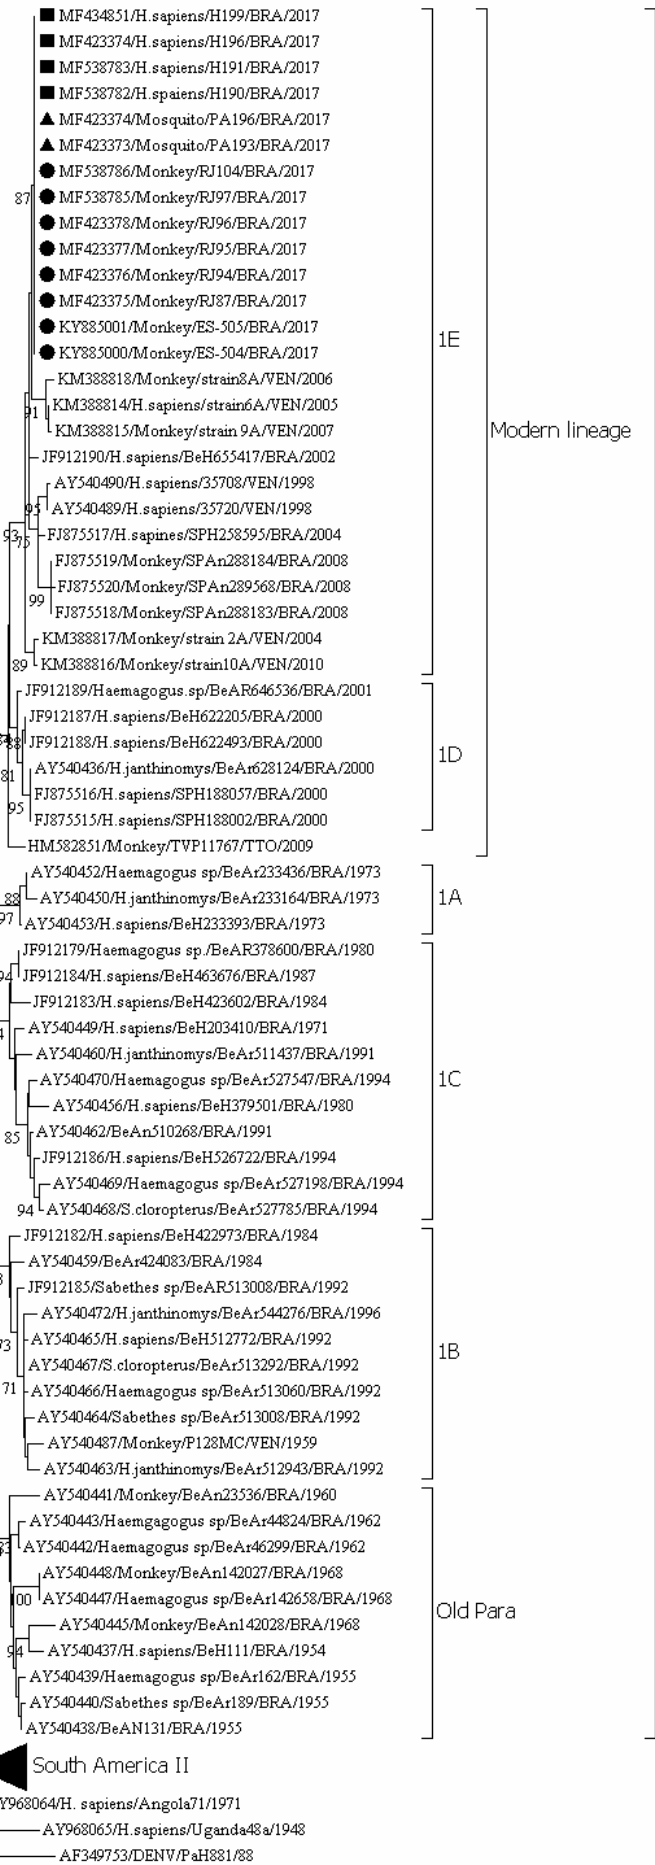

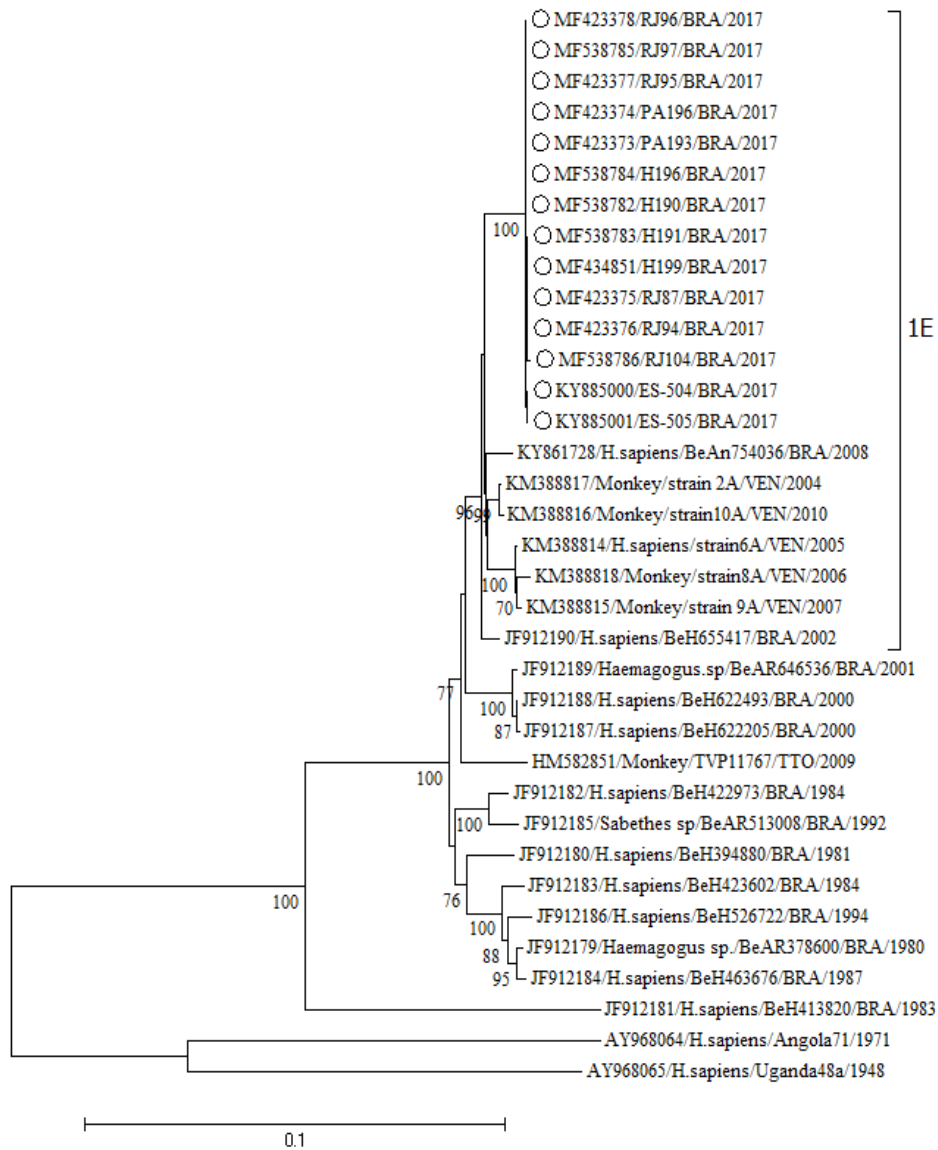

South America I

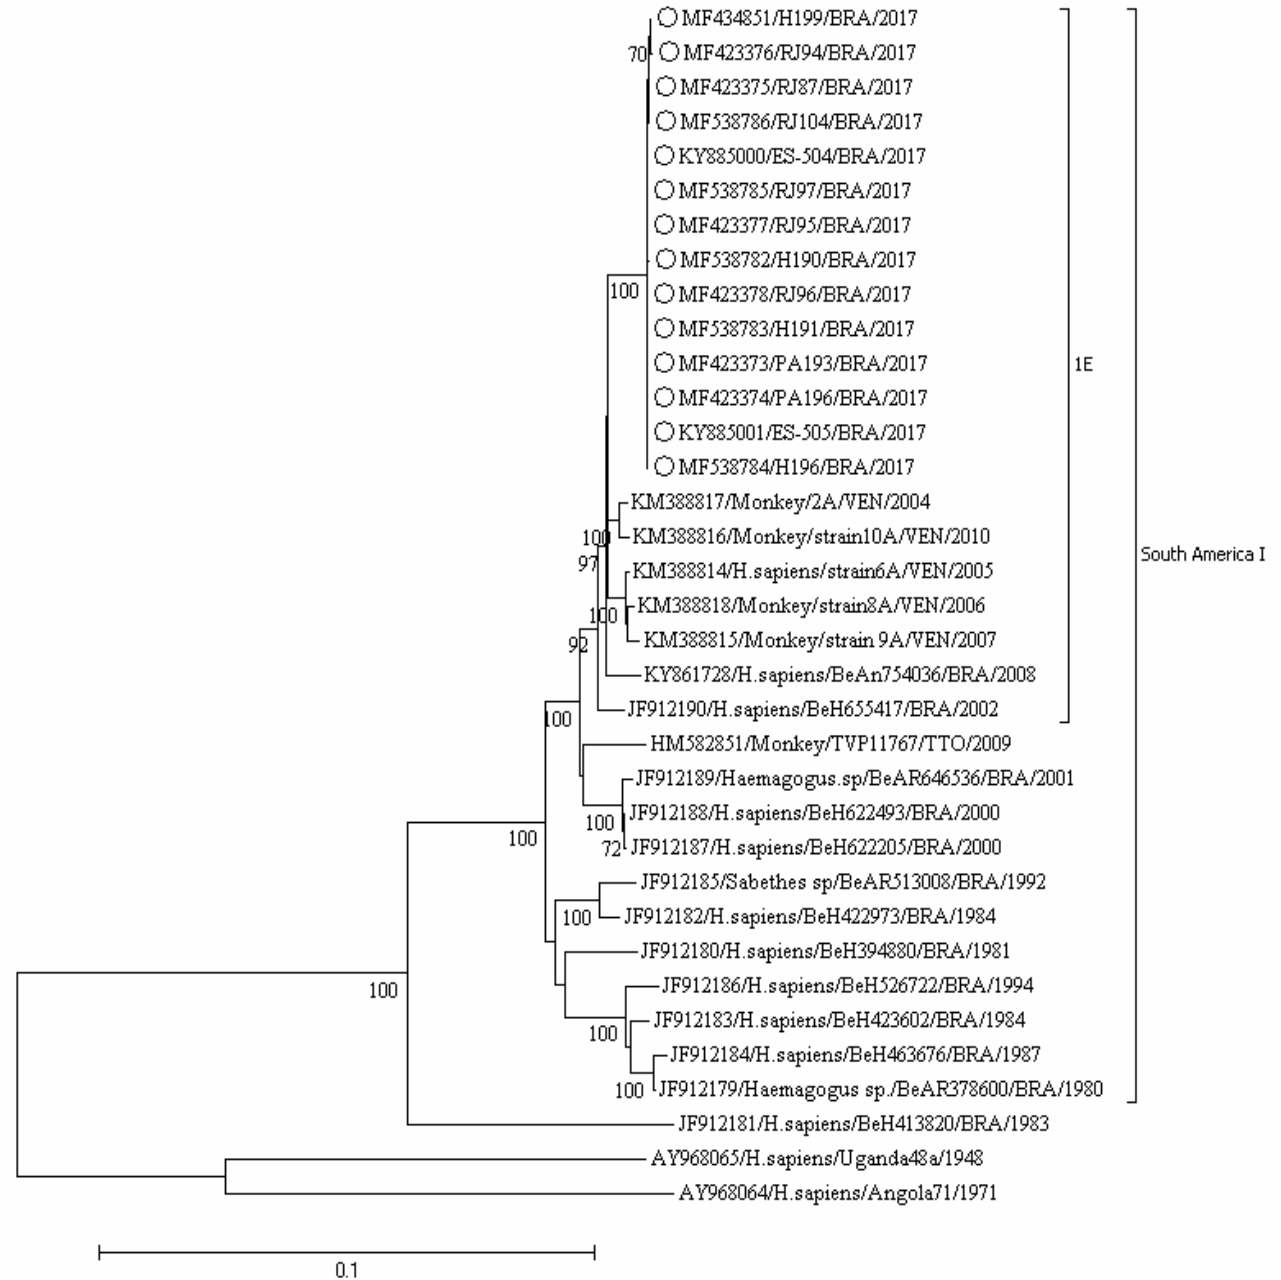

South America I





**YFV 2010**

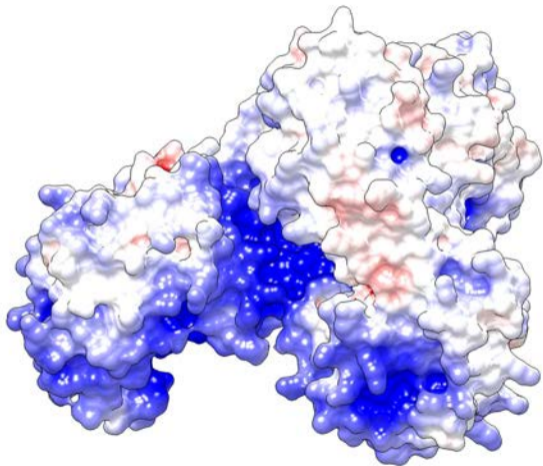

**YFV 2017**

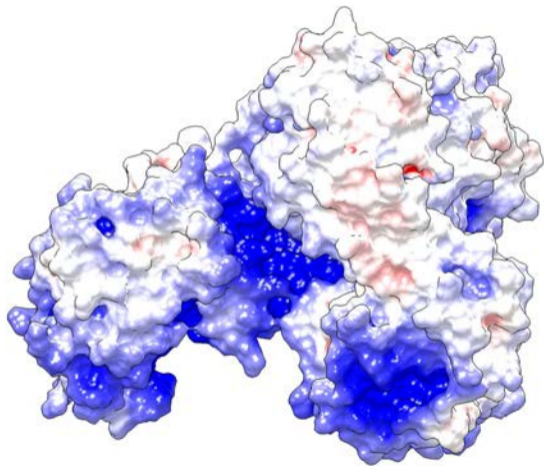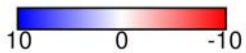

# Backbone RMSF

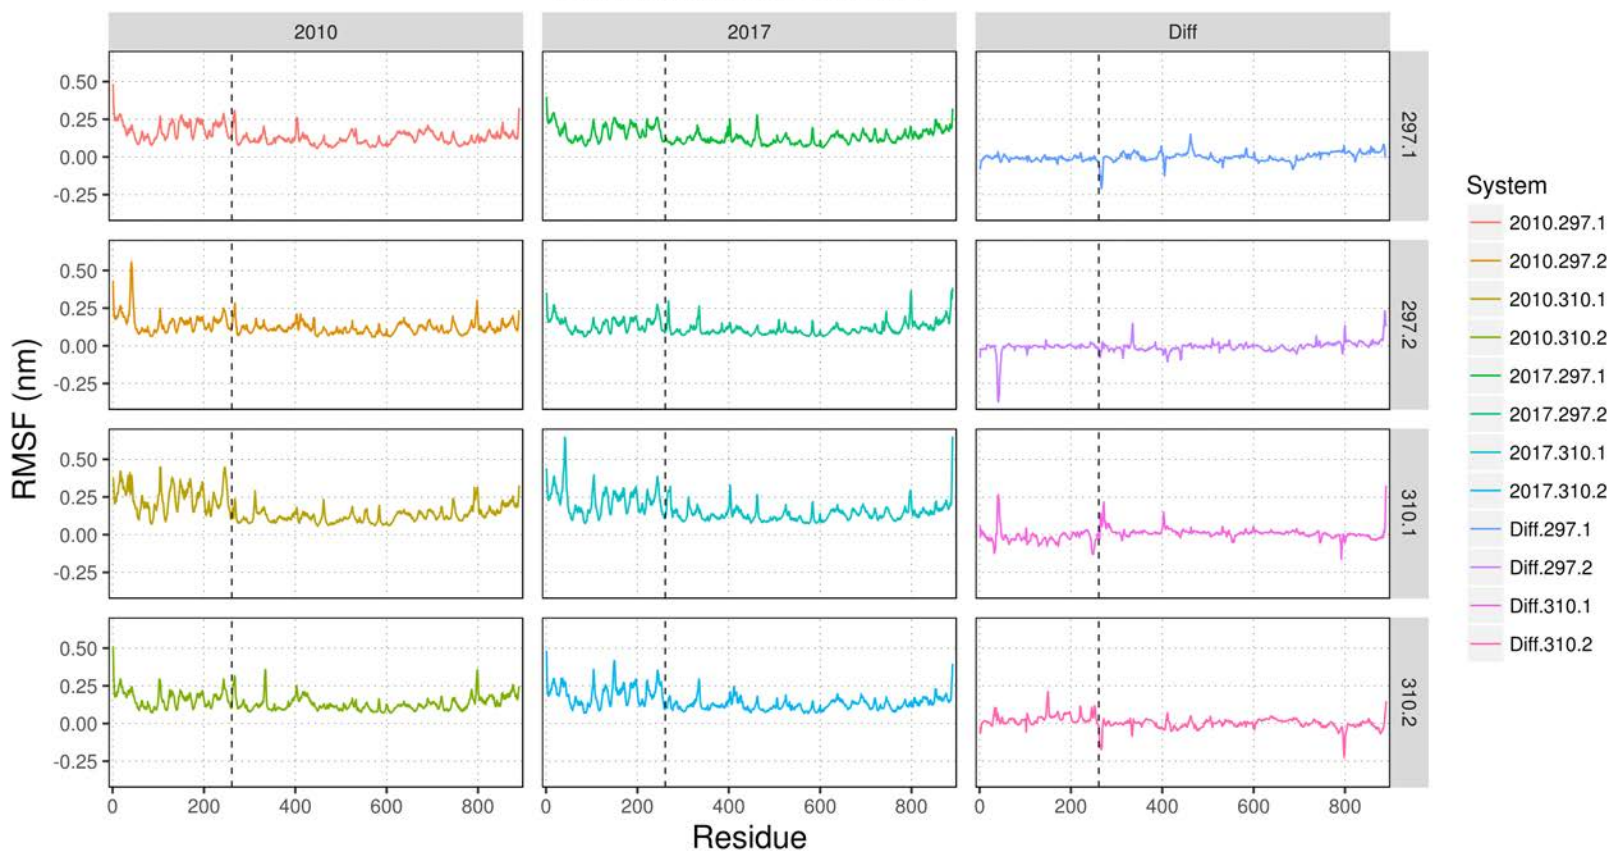



|                            |                         | Seq Id / Strain / Country / Year |                              | NS1              |                   | NS2A              | NS3               | NS4A              | NS4B              |                   |                   | NS5               |                   |                   |                   |                   |                   |                   |                   |   |
|----------------------------|-------------------------|----------------------------------|------------------------------|------------------|-------------------|-------------------|-------------------|-------------------|-------------------|-------------------|-------------------|-------------------|-------------------|-------------------|-------------------|-------------------|-------------------|-------------------|-------------------|---|
|                            |                         |                                  |                              | 826 <sup>a</sup> | 1062 <sup>a</sup> | 1197 <sup>a</sup> | 1835 <sup>a</sup> | 2176 <sup>a</sup> | 2311 <sup>a</sup> | 2408 <sup>a</sup> | 2502 <sup>a</sup> | 2503 <sup>a</sup> | 2601 <sup>a</sup> | 2640 <sup>a</sup> | 2647 <sup>a</sup> | 2803 <sup>b</sup> |                   |                   |                   |   |
| South America genotype I   | Old lineage             | 1B                               | JP912180/BeH394880/BRA/1981  | A                | N                 | N                 | T                 | I                 | H                 | N                 | K                 | T                 | R                 | R                 | D                 | N                 |                   |                   |                   |   |
|                            |                         |                                  | JP912182/BeH422973/BRA/1984  | A                | S                 | N                 | T                 | I                 | H                 | N                 | K                 | T                 | R                 | R                 | D                 | N                 |                   |                   |                   |   |
|                            |                         |                                  | JP912185/BeAR513008/BRA/1992 | A                | S                 | N                 | T                 | I                 | H                 | N                 | K                 | T                 | R                 | R                 | D                 | N                 |                   |                   |                   |   |
|                            |                         | 1C                               | JP912179/BeAR378600/BRA/1980 | A                | S                 | N                 | T                 | I                 | H                 | N                 | N                 | T                 | K                 | R                 | R                 | D                 | N                 |                   |                   |   |
|                            |                         |                                  | JP912183/BeH423602/BRA/1984  | A                | S                 | N                 | T                 | I                 | H                 | N                 | N                 | T                 | R                 | R                 | D                 | N                 |                   |                   |                   |   |
|                            |                         |                                  | JP912184/BeH463676/BRA/1987  | A                | S                 | N                 | T                 | I                 | H                 | N                 | N                 | T                 | K                 | R                 | D                 | N                 |                   |                   |                   |   |
|                            | 1D                      | JP912186/BeH526722/BRA/1994      | A                            | S                | S                 | T                 | I                 | H                 | N                 | K                 | T                 | K                 | R                 | D                 | N                 |                   |                   |                   |                   |   |
|                            |                         | JP912188/BeH622493/BRA/2000      | A                            | S                | N                 | T                 | I                 | H                 | N                 | K                 | T                 | R                 | R                 | D                 | D                 |                   |                   |                   |                   |   |
|                            |                         | JP912187/BeH622205/BRA/2000      | A                            | S                | N                 | T                 | I                 | H                 | N                 | K                 | T                 | R                 | R                 | D                 | D                 |                   |                   |                   |                   |   |
|                            | Modern lineage          | 1E                               | JP912189/BeAR646536/BRA/2001 | A                | S                 | N                 | T                 | I                 | H                 | N                 | K                 | T                 | R                 | P                 | V                 | D                 |                   |                   |                   |   |
|                            |                         |                                  | JP912190/BeH655417/BRA/2002  | A                | S                 | N                 | T                 | I                 | H                 | N                 | K                 | T                 | R                 | R                 | D                 | N                 |                   |                   |                   |   |
|                            |                         |                                  | KM388817/strain 2A/VEN/2004  | A                | S                 | N                 | T                 | I                 | H                 | N                 | K                 | T                 | R                 | R                 | D                 | N                 |                   |                   |                   |   |
|                            |                         |                                  | KM388814/strain6A/VEN/2005   | A                | S                 | N                 | T                 | I                 | H                 | N                 | K                 | I                 | R                 | R                 | D                 | N                 |                   |                   |                   |   |
|                            |                         |                                  | KM388818/strain8A/VEN/2006   | A                | S                 | N                 | K                 | I                 | L                 | S                 | N                 | T                 | R                 | R                 | D                 | S                 |                   |                   |                   |   |
|                            |                         |                                  | KM388815/strain 9A/VEN/2007  | A                | S                 | S                 | T                 | I                 | H                 | S                 | K                 | T                 | R                 | R                 | D                 | N                 |                   |                   |                   |   |
|                            |                         |                                  | KY861728/BeAn754036/BRA/2008 | A                | N                 | N                 | T                 | I                 | H                 | N                 | K                 | T                 | K                 | R                 | D                 | N                 |                   |                   |                   |   |
|                            |                         |                                  | KM388816/strain10A/VEN/2010  | A                | S                 | N                 | T                 | I                 | H                 | N                 | K                 | T                 | R                 | R                 | D                 | N                 |                   |                   |                   |   |
|                            |                         |                                  | KY885000/ES-504/BRA/2017     | A                | S                 | N                 | T                 | I                 | H                 | N                 | K                 | T                 | R                 | R                 | D                 | S                 |                   |                   |                   |   |
|                            |                         |                                  | KY885001/ES-505/BRA/2017     | A                | S                 | N                 | T                 | I                 | H                 | N                 | K                 | T                 | R                 | R                 | D                 | S                 |                   |                   |                   |   |
|                            |                         |                                  | MF423375/RJ87/BRA/2017       | A                | S                 | N                 | T                 | I                 | H                 | N                 | K                 | T                 | R                 | R                 | D                 | S                 |                   |                   |                   |   |
| TT                         | MF423376/RJ94/BRA/2017  | A                                | S                            | N                | T                 | I                 | H                 | N                 | K                 | T                 | R                 | R                 | D                 | S                 |                   |                   |                   |                   |                   |   |
|                            | MF423377/RJ95/BRA/2017  | A                                | S                            | N                | T                 | V                 | H                 | N                 | K                 | T                 | R                 | R                 | D                 | S                 |                   |                   |                   |                   |                   |   |
|                            | MF423378/RJ96/BRA/2017  | A                                | S                            | N                | T                 | V                 | H                 | N                 | K                 | T                 | R                 | R                 | D                 | S                 |                   |                   |                   |                   |                   |   |
|                            | MF538785/RJ97/BRA/2017  | A                                | S                            | N                | T                 | V                 | H                 | N                 | K                 | T                 | R                 | R                 | D                 | S                 |                   |                   |                   |                   |                   |   |
|                            | MF538786/RJ104/BRA/2017 | A                                | S                            | N                | T                 | I                 | H                 | N                 | K                 | T                 | R                 | R                 | D                 | S                 |                   |                   |                   |                   |                   |   |
|                            | MF423373/PA193/BRA/2017 | A                                | S                            | N                | T                 | V                 | H                 | N                 | K                 | T                 | R                 | R                 | D                 | S                 |                   |                   |                   |                   |                   |   |
|                            | MF423374/PA196/BRA/2017 | A                                | S                            | N                | T                 | I                 | H                 | N                 | K                 | T                 | R                 | R                 | D                 | S                 |                   |                   |                   |                   |                   |   |
|                            | MF538782/H190/BRA/2017  | A                                | S                            | N                | T                 | I                 | H                 | N                 | K                 | T                 | R                 | R                 | D                 | S                 |                   |                   |                   |                   |                   |   |
|                            | MF538783/H191/BRA/2017  | A                                | S                            | N                | T                 | V                 | H                 | N                 | K                 | T                 | R                 | R                 | D                 | S                 |                   |                   |                   |                   |                   |   |
|                            | MF434851/H199/BRA/2017  | S                                | S                            | N                | T                 | I                 | H                 | N                 | K                 | T                 | R                 | R                 | D                 | S                 |                   |                   |                   |                   |                   |   |
|                            | MF538784/H196/BRA/2017  | A                                | S                            | N                | T                 | I                 | H                 | N                 | K                 | T                 | R                 | R                 | D                 | S                 |                   |                   |                   |                   |                   |   |
| HM582851/TVP11767/TTO/2009 | A                       | S                                | N                            | T                | I                 | H                 | N                 | K                 | T                 | K                 | R                 | D                 | N                 |                   |                   |                   |                   |                   |                   |   |
| West African YFV strains   |                         |                                  | C                            |                  | E                 |                   |                   | NS1               | NS2A              | NS3               |                   |                   |                   | NS5               |                   |                   |                   |                   |                   |   |
|                            |                         | 25 <sup>d</sup>                  | 79 <sup>d</sup>              | 86 <sup>d</sup>  | 407 <sup>d</sup>  | 409 <sup>d</sup>  | 456 <sup>d</sup>  | 547 <sup>d</sup>  | 983 <sup>d</sup>  | 1277 <sup>d</sup> | 1738 <sup>d</sup> | 1764 <sup>d</sup> | 1928 <sup>d</sup> | 2029 <sup>d</sup> | 2030 <sup>d</sup> | 2508 <sup>d</sup> | 2801 <sup>d</sup> | 3227 <sup>d</sup> | 3388 <sup>d</sup> |   |
|                            |                         | AY640589/Asibi/GHA/1927          | N                            | A                | R                 | A                 | S                 | E                 | M                 | H                 | T                 | A                 | V                 | K                 | D                 | L                 | S                 | Y                 | Q                 | K |
|                            |                         | JX898869/DakArAmt7/CIV/1973      | N                            | A                | R                 | A                 | S                 | E                 | M                 | H                 | V                 | A                 | I                 | K                 | D                 | L                 | R                 | Y                 | Q                 | K |
|                            |                         | U54798/85-82H/CIV/1982           | N                            | A                | R                 | A                 | S                 | E                 | M                 | H                 | T                 | A                 | I                 | K                 | D                 | L                 | R                 | Y                 | Q                 | K |
|                            |                         | JX898868/HD117294/SEN/1995       | N                            | A                | R                 | A                 | S                 | E                 | M                 | H                 | T                 | G                 | I                 | K                 | D                 | L                 | R                 | H                 | Q                 | K |
|                            |                         | JX898871/ArD114896/SEN/1995      | N                            | A                | R                 | A                 | S                 | E                 | M                 | H                 | T                 | A                 | I                 | K                 | D                 | L                 | T                 | Y                 | Q                 | K |
|                            |                         | JX898872/ArD114972/SEN/1995      | N                            | A                | R                 | A                 | S                 | E                 | M                 | H                 | T                 | A                 | I                 | K                 | D                 | L                 | T                 | Y                 | Q                 | K |
|                            |                         | JX898870/ArD121040/SEN/1996      | S                            | V                | K                 | A                 | S                 | E                 | M                 | N                 | T                 | A                 | I                 | K                 | D                 | L                 | R                 | Y                 | Q                 | K |
|                            |                         | AY603338/Ivory Coast/CIV/1999    | N                            | A                | R                 | A                 | S                 | E                 | M                 | H                 | T                 | A                 | I                 | K                 | D                 | Q                 | R                 | Y                 | H                 | K |
|                            |                         | JX898873/ArD149214/SEN/2000      | N                            | A                | R                 | A                 | S                 | E                 | T                 | H                 | T                 | A                 | I                 | K                 | G                 | L                 | R                 | Y                 | Q                 | K |
|                            |                         | JX898874/ArD149194/SEN/2000      | N                            | A                | R                 | A                 | S                 | E                 | M                 | H                 | T                 | A                 | I                 | K                 | D                 | L                 | R                 | Y                 | Q                 | K |
|                            |                         | JX898875/ArD149815/SEN/2000      | N                            | A                | R                 | A                 | S                 | K                 | M                 | H                 | T                 | A                 | I                 | R                 | D                 | L                 | R                 | Y                 | Q                 | K |
|                            |                         | AY572535/Gambia2001/GMB/2001     | N                            | A                | R                 | A                 | S                 | E                 | M                 | H                 | T                 | A                 | I                 | K                 | D                 | -                 | R                 | Y                 | H                 | K |
|                            |                         | JX898876/ArD156468/SEN/2001      | N                            | A                | R                 | V                 | F                 | E                 | M                 | H                 | T                 | A                 | I                 | K                 | D                 | L                 | S                 | Y                 | Q                 | R |
|                            |                         | JX898878/ArD181250/SEN/2005      | N                            | V                | R                 | A                 | S                 | E                 | M                 | H                 | T                 | A                 | I                 | K                 | D                 | L                 | R                 | Y                 | Q                 | K |
|                            |                         | JX898879/ArD181676/SEN/2005      | N                            | V                | R                 | A                 | S                 | E                 | M                 | H                 | T                 | A                 | I                 | K                 | D                 | L                 | R                 | Y                 | Q                 | K |
|                            |                         | JX898881/ArD181439/SEN/2005      | N                            | V                | R                 | A                 | S                 | E                 | M                 | H                 | T                 | A                 | I                 | K                 | D                 | L                 | R                 | Y                 | Q                 | K |
|                            |                         | JX898877/ArD181464/SEN/2005      | N                            | V                | R                 | A                 | S                 | E                 | M                 | H                 | T                 | A                 | I                 | K                 | D                 | L                 | R                 | Y                 | Q                 | K |
|                            |                         | JX898880/ArD181564/SEN/2005      | N                            | V                | R                 | A                 | S                 | E                 | M                 | H                 | T                 | A                 | I                 | K                 | D                 | L                 | R                 | Y                 | Q                 | K |

| South America genotype | Genbank accession number | Country         | Isolation date |
|------------------------|--------------------------|-----------------|----------------|
| I                      | MF423373                 | Brazil          | 2017           |
|                        | MF423378                 |                 |                |
|                        | MF538785                 |                 |                |
|                        | MF423377                 |                 |                |
|                        | MF538784                 |                 |                |
|                        | MF423374                 |                 |                |
|                        | KY885000                 |                 |                |
|                        | KY885001                 |                 |                |
|                        | MF423376                 |                 |                |
|                        | MF538783                 |                 |                |
|                        | MF434851                 |                 |                |
|                        | MF423375                 |                 |                |
|                        | MF538786                 |                 |                |
|                        | MF538782                 |                 |                |
|                        | KM388815                 |                 |                |
|                        | KM388818                 | 2006            |                |
|                        | KM388814                 | 2005            |                |
|                        | KM388816                 | 2010            |                |
|                        | KM388817                 | 2004            |                |
|                        | KY861728                 | Brazil          | 2008           |
|                        | JF912190                 |                 | 2002           |
|                        | JF912187                 |                 | 2000           |
|                        | JF912188                 |                 | 2000           |
|                        | JF912189                 |                 | 2001           |
|                        | HM582851                 | Trinidad-Tobago | 2009           |
|                        | JF912185                 | Brazil          | 1992           |
|                        | JF912182                 |                 | 1984           |
|                        | JF912180                 |                 | 1981           |
|                        | JF912184                 |                 | 1987           |
|                        | JF912179                 |                 | 1980           |
|                        | JF912186                 |                 | 1994           |
|                        | JF912183                 |                 | 1984           |
|                        | KF907504                 |                 | Bolivia        |
| JF912181               | Brazil                   | 1983            |                |
| II                     |                          |                 |                |
